# Supplementary material for: Clinical significance of nonerythrocytic spectrin Beta 1 (SPTBN1) in human kidney renal clear cell carcinoma and uveal melanoma: a study based on Pan-Cancer Analysis
Source: Springer Nature journal article supplement (doi:10.1186/s12885-023-10789-3), 2023-04-03
Supplement: MOESM1 [file 12885_2023_10789_MOESM1_ESM.pdf]

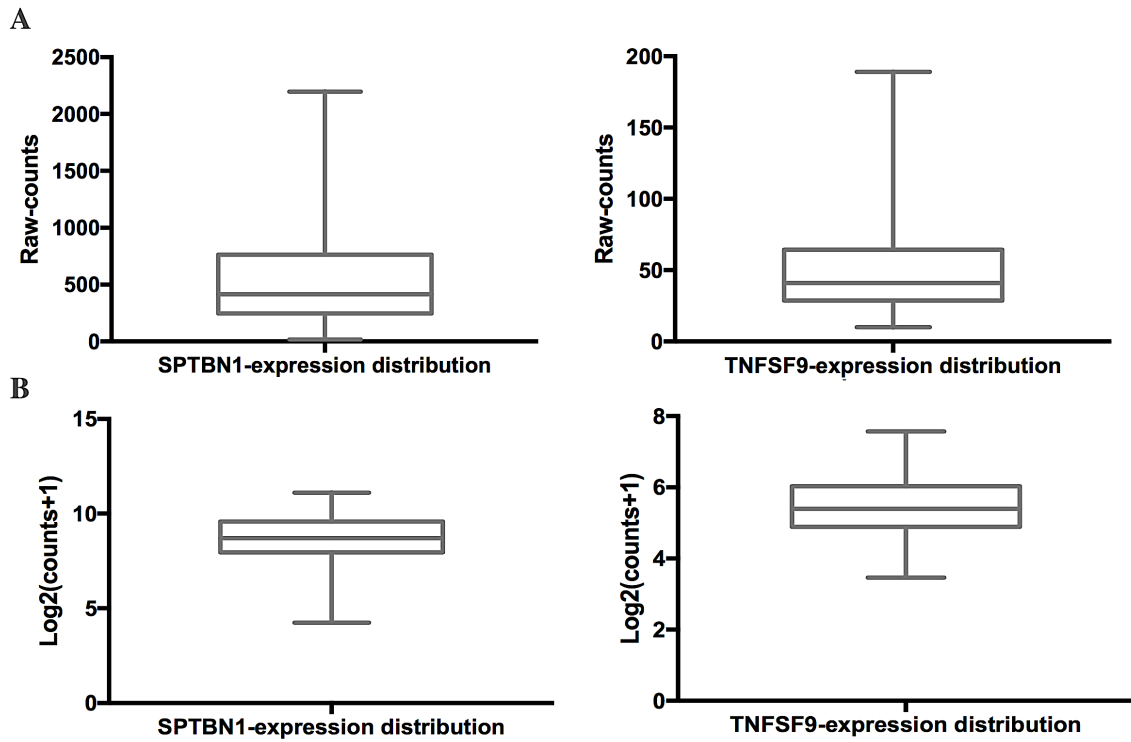

**Supplementary File 1:** The counts distributions of SPTBN1 and TNFSF9 expression obtained from GSE44295 dataset. **(A)** expression abundances in their raw-counts forms. **(B)** expression abundances in their  $\log_2(\text{counts}+1)$  normalized form. SPTBN1, non-erythrocytic spectrin beta 1; TNFSF9, tumor necrosis factor superfamily member 9.
