# Supplementary material for: Clinical significance of nonerythrocytic spectrin Beta 1 (SPTBN1) in human kidney renal clear cell carcinoma and uveal melanoma: a study based on Pan-Cancer Analysis
Source: Springer Nature journal article supplement (doi:10.1186/s12885-023-10789-3), 2023-04-03
Supplement: MOESM2 [file 12885_2023_10789_MOESM2_ESM.pdf]

## Coexpression across cancer types

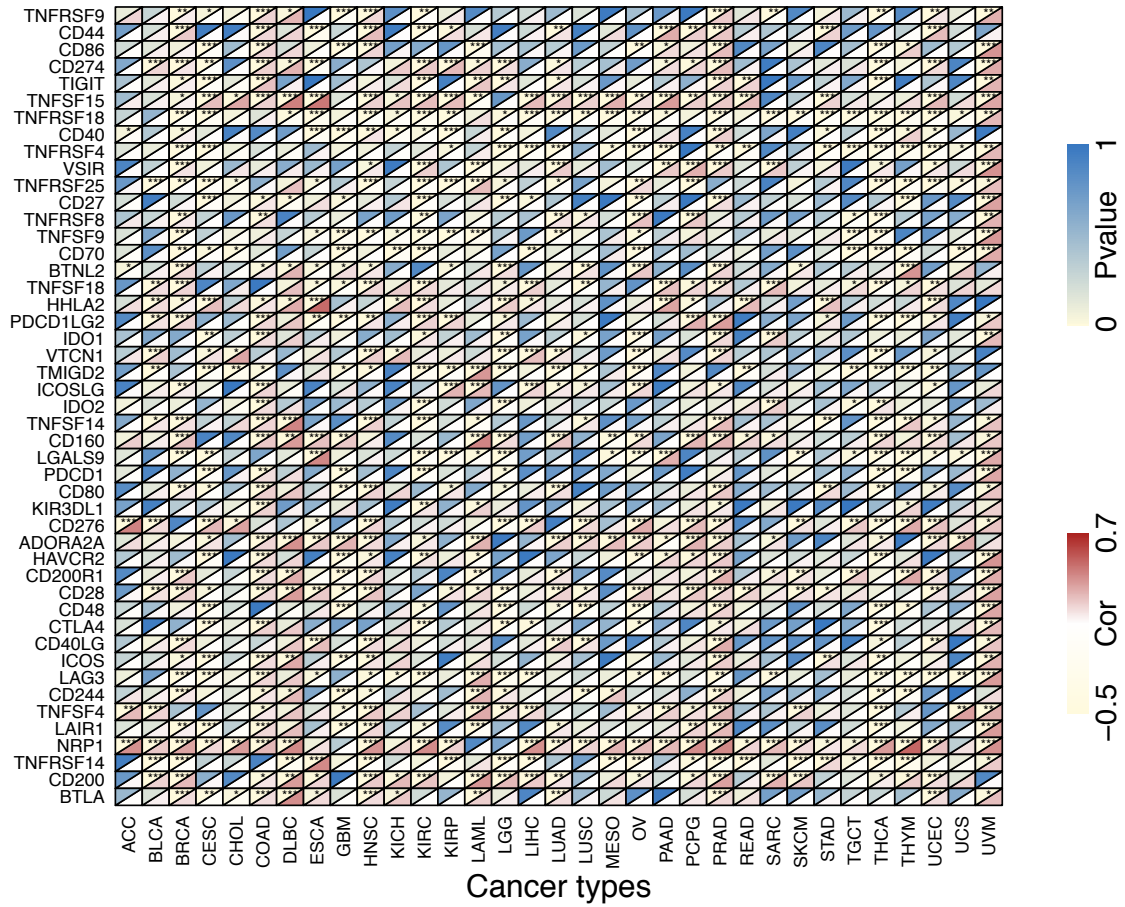

**Supplementary File 2:** Correlation between SPTBN1 expression and immunomodulator marker sets across TCGA cancers. \*  $P < 0.05$ ; \*\*  $P < 0.01$ ; \*\*\*  $P < 0.001$ .  $P$  value  $< 0.05$  were considered to be statistically significant.
