# Supplementary material for: Clinical significance of nonerythrocytic spectrin Beta 1 (SPTBN1) in human kidney renal clear cell carcinoma and uveal melanoma: a study based on Pan-Cancer Analysis
Source: BMC Cancer. 2023 Apr 3;23:303. doi: 10.1186/s12885-023-10789-3 (PMC10071745; doi:10.1186/s12885-023-10789-3)
Supplement: Supplementary file 3 — Supplementary Material 3 [file 12885_2023_10789_MOESM3_ESM.xlsx]

## Sheet: Sheet1
revised_Supplementary File 3 Detailed information about IHC-P scores of SPTBN1/TNFSF9 and survival data of SYSUCC KIRC patients.
Patient_ID	Sex	Age	Grade (ISUP_grading system )	Stage (TNM_staging system)	SPTBN1 (IHC_intensity)	SPTBN1 (IHC_extent)	SPTBN1 (IHC-P)	TNFSF9 (IHC_intensity)	TNFSF9 (IHC_extent)	TNFSF9 (IHC-P)	Fustat	Date_diagnosis	Date_follow-up/death	Futime (day)
1	F	56	2	T1N0M0	1	3(80%)	3	1	3(70%)	3	0	2017-05-21	2022-01-24	1709.67
2	F	68	3	T2N1M0	2	3(90%)	6	1	4(90%)	4	0	2017-05-31	2022-01-24	1699.64
3	M	54	3	T1N0M0	1	3(95%)	3	2	4(100%)	8	0	2016-12-19	2022-01-27	1865.44
4	M	65	2	T1N0M0	2	3(100%)	6	1	4(100%)	4	1	2017-06-27	2021-02-09	1322.38
5	M	57	2	T1N0M0	1	3(80%)	3	2	4(90%)	8	0	2017-03-29	2017-06-02	64.5833
6	M	33	2	T1N0M0	1	3(80%)	3	2	4(100%)	8	0	2017-05-18	2022-01-24	1712.67
7	F	44	2	T1N0M0	0	3(90%)	0	1	4(100%)	4	0	2017-02-17	2022-01-26	1804.43
8	M	71	4	T2N2M1	0	3(90%)	0	2	4(100%)	8	1	2017-03-09	2017-07-24	136.458
9	M	55	2	T1N0M0	0	3(100%)	0	2	4(100%)	8	0	2017-02-13	2022-01-26	1808.47
10	M	53	2	T1N0M0	0	3(100%)	0	2	4(100%)	8	0	2017-02-20	2022-01-10	1785.42
11	M	55	2	T1N0M0	1	1(30%)	1	3	4(100%)	12	0	2017-11-22	2022-05-19	1638.67
12	M	36	3	T1N0M0	1	1(30%)	1	3	4(100%)	12	0	2017-12-25	2022-07-05	1652.67
13	M	62	2	T1N1M0	2	3(90%)	6	3	2(30%)	6	0	2019-06-18	2020-04-30	316.542
14	M	61	2	T1N0M0	2	3(80%)	6	2	4(100%)	8	0	2019-09-17	2021-07-19	670.542
15	M	44	2	T1N0M0	2	2(50%)	4	2	4(100%)	8	0	2018-01-22	2022-03-08	1506.71
16	M	55	1	T1N0M0	1	2(60%)	2	1	4(100%)	4	0	2018-01-31	2022-04-01	1520.54
17	F	56	4	T2N0M0	1	3(70%)	3	1	4(100%)	4	0	2019-10-08	2022-03-11	885.547
18	F	47	4	T2N2M1	0	3(80%)	0	2	3(80%)	6	1	2017-09-14	2021-02-15	1249.58
19	M	63	2	T1N0M0	0	3(100%)	0	3	4(100%)	12	0	2018-01-11	2022-03-09	1518.38
20	M	45	2	T1N0M0	1	2(55%)	2	2	4(100%)	8	0	2018-01-17	2022-01-12	1456.44
21	M	37	2	T1N0M0	1	3(95%)	3	3	3(80%)	9	0	2019-01-29	2022-06-06	1223.62
22	M	55	2	T1N0M0	1	1(30%)	1	3	4(100%)	12	1	2019-02-15	2022-07-20	1250.5
23	M	59	2	T2N1M0	2	3(100%)	6	3	2(30%)	6	0	2018-11-08	2020-09-15	676.583
24	F	64	3	T2N1M0	1	1(30%)	1	3	4(100%)	12	1	2020-06-09	2022-01-12	582.467
25	M	68	2	T1N0M0	2	3(70%)	6	2	4(100%)	8	0	2020-08-25	2022-06-14	657.583
26	M	64	3	T2N1M0	1	3(100%)	3	1	3(80%)	3	0	2018-07-25	2022-06-15	1421.4
27	M	47	2	T2N2M1	2	3(100%)	6	3	2(50%)	6	0	2018-09-14	2019-12-19	460.375
28	M	56	2	T1N0M0	1	3(70%)	3	2	4(100%)	8	0	2018-09-30	2022-01-11	1199.4
29	F	54	2	T1N0M0	1	1(30%)	1	3	4(100%)	12	1	2019-04-04	2021-07-09	826.625
Note: In "fustat" column, 0 and 1 represent alive and dead, respectively.
