# Supplementary material for: Clinical significance of nonerythrocytic spectrin Beta 1 (SPTBN1) in human kidney renal clear cell carcinoma and uveal melanoma: a study based on Pan-Cancer Analysis
Source: BMC Cancer. 2023 Apr 3;23:303. doi: 10.1186/s12885-023-10789-3 (PMC10071745; doi:10.1186/s12885-023-10789-3)
Supplement: Supplementary file 4 — Supplementary Material 4 [file 12885_2023_10789_MOESM4_ESM.xlsx]

## Sheet: Sheet1
revised_Supplementary File 4 Detailed information about SPTBN1/TNFSF9 expression and survival data of UVM cases from GSE44295.
sample_ID	SPTBN1_expression log2(counts+1)	TNFSF9_expression log2(counts+1)	fustat	futime(day)
GSM1082563	8.24076	4.99349	1	547
GSM1082565	9.64891	5.12821	0	2799
GSM1082566	9.91158	4.73057	1	548
GSM1082568	10.7739	7.52857	1	731
GSM1082569	7.96563	5.0832	0	1644
GSM1082570	9.95117	5.89251	1	457
GSM1082571	9.15692	5.24805	1	60
GSM1082572	8.98876	5.39427	0	457
GSM1082574	7.33587	4.35088	0	2284
GSM1082575	10.055	6.67591	0	1796
GSM1082577	8.70992	3.4613	0	518
GSM1082578	8.20404	6.03437	1	975
GSM1082579	9.98189	6.36177	1	1278
GSM1082580	8.57375	5.56384	0	2434
GSM1082581	9.27724	5.62841	0	1766
GSM1082582	11.1014	5.37983	0	1614
GSM1082583	7.07027	4.88778	0	1583
GSM1082584	9.88215	5.46663	1	792
GSM1082586	9.56245	5.06808	1	1157
GSM1082587	9.87711	5.4879	1	562
GSM1082588	10.1568	7.31952	0	2041
GSM1082589	8.8478	6.75835	1	822
GSM1082590	9.65245	6.63071	1	1186
GSM1082591	9.59587	6.27542	0	1614
GSM1082592	4.24077	5.7617	0	1491
GSM1082593	9.45902	6.02521	1	791
GSM1082594	9.42098	5.39477	0	2284
GSM1082595	8.99202	4.97909	0	2952
GSM1082596	8.44613	3.89486	1	365
GSM1082598	10.6662	5.59874	1	426
GSM1082599	10.3387	6.31467	1	943
GSM1082600	6.9457	5.51195	0	3105
GSM1082601	9.34617	6.59376	0	2782
GSM1082602	8.76954	5.71706	1	1003
GSM1082603	7.65119	4.07361	1	342
GSM1082604	7.77724	7.18642	0	1413
GSM1082605	7.93842	7.57021	0	2100
GSM1082606	7.72928	4.55587	1	1192
GSM1082607	9.04218	4.90793	1	1157
GSM1082608	7.89682	4.14385	0	1338
GSM1082609	6.64796	4.28385	0	1338
GSM1082610	7.91436	4.27842	1	995
GSM1082611	9.06711	6.38975	0	699
GSM1082612	8.54376	5.52074	0	1310
GSM1082613	8.49366	5.09498	0	820
GSM1082614	8.00095	4.25535	0	1553
GSM1082615	8.60585	5.38495	1	822
GSM1082616	7.80727	4.89847	0	1249
GSM1082617	6.21343	4.80174	0	1218
GSM1082618	8.70606	5.93096	0	1188
GSM1082619	8.51019	4.55325	0	1218
GSM1082620	8.46799	4.91308	0	1218
GSM1082621	8.99253	4.33001	1	488
GSM1082622	6.71596	5.97236	0	1126
GSM1082623	8.02758	5.01178	0	1035
GSM1082624	8.14228	6.42026	1	668
GSM1082625	8.41832	5.96527	0	945
Note: In "fustat" column, 0 and 1 represent alive and dead, respectively.
