# Supplementary material for: Clinical significance of nonerythrocytic spectrin Beta 1 (SPTBN1) in human kidney renal clear cell carcinoma and uveal melanoma: a study based on Pan-Cancer Analysis
Source: BMC Cancer. 2023 Apr 3;23:303. doi: 10.1186/s12885-023-10789-3 (PMC10071745; doi:10.1186/s12885-023-10789-3)
Supplement: Supplementary file 5 — Supplementary Material 5 [file 12885_2023_10789_MOESM5_ESM.xlsx]

## Sheet: Sheet1
revised_Suppmentary File 5 Detailed information about the prognostic risk model based on expression of SPTBN1 and SPTBN1-associated immunodulator gene signature in KIRC.
id	futime(year)	fustat	ADORA2A	CD27	CD44	CD70	CD200	IDO1	LAIR1	LGALS9	NRP1	PDCD1	TNFRSF25	TNFSF18	VSIR	SPTBN1	riskScore	risk
TCGA-3Z-A93Z	1.05479	0	0.498321	3.12675	3.98801	4.83688	4.62757	3.8584	2.90419	3.35851	5.61198	1.96005	2.66155	0.65188	4.69126	5.28151	0.935133	low
TCGA-6D-AA2E	0.991781	0	0.812901	1.74948	3.91052	3.51839	3.18707	2.29692	2.64908	3.00233	5.75669	1.34964	3.31238	0.402457	3.63335	6.11499	0.342844	low
TCGA-A3-3306	3.06849	0	0.164908	3.59559	4.16729	6.84921	4.38481	1.94321	2.04626	3.43162	4.30921	1.84824	1.69747	0.35504	3.81699	4.47273	1.67921	high
TCGA-A3-3307	3.93425	0	0.214164	4.50943	4.98741	6.27347	3.24657	3.7644	3.88418	4.29571	4.60803	3.29435	1.45616	0.6666	4.555	5.23356	1.10279	high
TCGA-A3-3308	0.0438356	0	0.49256	1.02303	5.66593	4.86164	4.03539	3.83241	2.86684	4.39844	5.69954	0.802264	0.999345	0.468031	3.74446	5.2776	0.301395	low
TCGA-A3-3311	3.26301	1	0.124201	0.544308	5.44657	0.717606	3.77668	2.7436	1.01657	2.74593	5.58854	0.13999	1.51609	0.226329	4.12653	4.99011	0.278243	low
TCGA-A3-3313	2.0137	1	0.256362	1.52095	3.50986	5.91323	4.74651	3.46128	2.22465	2.90505	5.6942	0.529633	1.18896	0.225515	4.62937	6.2672	0.41412	low
TCGA-A3-3316	4.09041	0	0.430228	1.62312	3.64844	1.35328	3.0288	4.53258	1.84613	3.14433	5.57159	0.91434	0.79796	0.467142	3.95744	4.8717	0.651156	low
TCGA-A3-3317	4.08493	0	0.475114	2.16045	3.46586	5.59025	4.28203	2.81265	2.69466	3.36404	5.29349	0.777055	1.92188	0.29547	3.72033	5.42883	1.17234	high
TCGA-A3-3319	3.09589	0	0.246315	3.66796	4.99569	5.69857	5.32422	4.21802	2.49527	3.34767	5.93604	1.00248	1.47966	0.410992	5.25837	4.24877	2.90748	high
TCGA-A3-3320	4.13151	0	0.425385	4.96173	4.06871	5.87259	3.95385	3.20824	2.60889	3.10288	5.15215	3.46997	1.88046	0.138797	4.21617	5.87487	0.459287	low
TCGA-A3-3322	4.04932	0	0.1954	1.93714	2.93626	4.78644	2.23285	2.64425	1.91107	2.95459	3.30853	1.82969	1.7267	0.381691	4.05291	5.48134	0.452116	low
TCGA-A3-3323	3.03014	0	0.348815	3.93117	4.43462	5.5955	2.86352	4.69743	3.34196	3.93943	3.81346	2.2733	1.58466	0.0413004	4.16298	5.36329	1.08441	high
TCGA-A3-3324	3.24932	0	0.283306	4.80928	4.49353	5.29475	3.79795	4.71026	3.40048	3.47564	5.78475	3.18476	1.9842	0.351937	4.31731	5.16327	2.18031	high
TCGA-A3-3325	3.20548	1	0.26129	4.45718	3.68953	6.04477	3.85017	3.87684	2.40859	3.7623	5.01011	2.90199	1.4057	0.292627	4.61758	5.06443	0.906792	low
TCGA-A3-3326	3.11507	0	0.335092	2.56236	4.20244	3.00196	4.60491	2.95943	3.1256	3.43267	6.32078	0.918391	1.44985	0.348211	4.5804	5.4105	0.974308	low
TCGA-A3-3328	3.79452	0	0.255178	3.993	2.98085	6.18225	4.32601	3.91765	2.40499	3.77349	5.09357	2.58528	2.13855	0.193283	3.9555	3.98677	3.6996	high
TCGA-A3-3329	4.44932	0	0.311051	3.3119	4.18164	4.64902	3.00228	1.81749	2.22812	2.96888	5.65417	1.00963	0.775765	0.456461	4.88576	4.77948	1.4983	high
TCGA-A3-3331	3.44384	0	0.566862	1.06711	3.26915	0.684457	4.06282	1.86483	2.82626	3.05686	5.86885	0.395548	2.42652	0.680786	3.94552	5.58514	0.569472	low
TCGA-A3-3335	5.16712	0	0.339374	3.5818	6.21843	3.10794	3.32	2.09547	3.94245	3.81708	5.59051	2.47934	2.59161	0.795562	4.35196	4.19983	2.00883	high
TCGA-A3-3343	2.58904	0	0.227797	1.8025	4.41011	1.22722	4.6872	4.28393	2.24542	3.06723	5.86762	0.526188	1.99752	0.793806	4.31056	5.11613	1.15799	high
TCGA-A3-3346	0.375342	1	0.292024	1.06721	2.68094	2.89054	3.81541	5.18659	1.66101	3.15342	6.33245	0.550826	0.718136	0.249499	4.63937	2.93982	3.8592	high
TCGA-A3-3347	4.41096	1	0.316436	3.78682	2.57423	6.37252	3.46361	3.50176	1.25984	2.20947	4.7819	2.72117	1.57881	0.162062	4.09894	4.80162	1.18424	high
TCGA-A3-3349	3.79452	0	0.873333	2.64371	3.95296	2.85747	3.71338	4.39302	2.78059	2.20728	6.13955	2.35188	2.35775	0.709756	3.36907	5.80271	0.50207	low
TCGA-A3-3351	2.49315	0	0.205309	3.70671	4.2195	6.4622	3.15316	3.25261	2.96765	3.90729	4.39061	2.14634	0.385641	0.157701	4.72947	5.47483	0.583676	low
TCGA-A3-3352	1.53699	1	0.112546	1.12769	4.0352	5.40203	4.46218	2.4963	3.00771	3.03756	4.90841	0.535699	1.31401	0.137056	2.88294	5.50819	1.40036	high
TCGA-A3-3357	7.36438	0	0.0303437	0.873612	4.3859	0.232077	3.97589	2.78157	1.08712	2.83911	5.46157	0.24207	0.567044	0.170894	3.66374	4.77674	0.440125	low
TCGA-A3-3358	3.58082	0	0.273938	1.43076	4.57034	4.34542	2.99915	1.08702	3.04934	2.81702	5.46861	0.841398	2.1955	0.375966	4.29946	4.73391	1.56813	high
TCGA-A3-3359	6.86027	0	0.435683	3.02003	3.6061	3.87068	4.54109	3.94909	2.87886	2.65034	5.42328	1.4679	1.66468	0.407459	4.22751	5.25988	1.382	high
TCGA-A3-3362	4.27123	0	2.05144	1.79133	5.21317	4.15084	2.30598	1.77073	2.56818	3.99101	4.16896	1.06657	3.09738	0.853239	2.96584	5.67748	0.0411869	low
TCGA-A3-3363	0.873973	0	0.323845	1.93281	4.80444	6.77955	4.14915	3.54774	3.4659	3.00971	5.39522	0.741322	2.00807	1.36905	4.36026	3.70189	9.98899	high
TCGA-A3-3365	2.39178	0	0.130876	2.21644	5.24067	2.56207	1.42258	3.01647	3.13863	3.98173	3.78904	1.72562	2.86887	0.290511	3.44364	5.20972	1.1702	high
TCGA-A3-3367	6.21918	0	0.189155	0.739074	2.47541	0.128233	2.36905	2.40489	0.88167	1.69178	3.75142	0.19301	0.821971	0.278291	2.56022	5.77222	0.476671	low
TCGA-A3-3370	6.23014	0	0.693958	1.5904	3.10882	5.11978	3.79605	3.7706	2.14813	2.92408	5.73542	1.0443	2.21934	0.102288	4.38232	5.59427	0.437482	low
TCGA-A3-3372	2.0137	0	0.481001	2.84605	3.06261	4.51539	4.50017	4.97034	2.13177	3.10574	5.66545	2.06318	1.82847	0.30578	4.21026	5.75319	0.484687	low
TCGA-A3-3373	4.4411	0	0.367327	1.89696	5.65216	2.88203	4.57459	3.76331	3.29315	3.78826	6.04065	1.06481	1.32573	0.610232	4.04201	5.24212	0.60999	low
TCGA-A3-3374	3.6	0	0.207572	3.09019	5.84913	6.28891	4.26845	2.73837	2.87712	3.92017	5.91696	1.72159	1.8778	0.896599	3.86631	4.47966	2.33553	high
TCGA-A3-3376	4.64658	1	0.341671	1.28567	3.76555	2.02628	4.17388	4.03926	3.41123	3.58241	5.86023	1.07328	2.18831	0.221657	5.19326	6.32744	0.257591	low
TCGA-A3-3378	1.72603	0	0.632541	4.577	4.1396	5.04387	4.25711	4.70006	3.22463	3.52606	5.23343	3.07417	2.43087	0.236246	4.6601	4.57318	1.29105	high
TCGA-A3-3380	1.55342	0	0.162752	3.79733	5.12976	6.25171	4.12001	3.22651	3.2349	4.08617	5.43704	2.02519	0.896455	0.233252	4.09965	4.97496	1.46327	high
TCGA-A3-3382	1.5726	0	0.183641	0.586442	3.19401	0.06355	3.39517	0.992101	0.92901	2.60913	5.03609	0.134757	1.65256	0.130254	2.90138	4.71802	0.622087	low
TCGA-A3-3383	2.3589	0	0.727131	3.64645	2.8309	4.01702	3.51514	1.98542	2.81317	2.88732	5.21814	2.8623	2.10162	1.1017	3.82633	4.2416	1.57861	high
TCGA-A3-3385	5.46027	0	0.236542	3.3769	4.52332	5.29747	4.00008	3.09216	3.47562	4.07922	5.59293	1.56449	0.776615	0.448472	4.43154	4.54686	2.25577	high
TCGA-A3-3387	1.69041	0	0.741363	2.49196	3.59955	4.51041	3.86175	4.44045	2.26977	3.20185	6.15323	1.61619	2.44075	0.202421	4.67387	5.52039	0.445494	low
TCGA-A3-A6NI	2.78904	0	0.298366	2.45055	3.72795	4.28824	3.7071	2.44563	2.52579	3.90203	4.66032	1.51853	2.51646	0.13452	3.91514	5.1864	0.766318	low
TCGA-A3-A6NJ	1.28219	0	0.635514	3.94289	3.77429	4.83585	3.13081	2.05258	2.99918	3.53958	5.24439	2.97276	1.8218	0.0778952	4.80971	5.65382	0.245967	low
TCGA-A3-A6NL	1.88767	0	0.221467	3.12053	4.70379	5.7898	4.78707	2.1314	3.83688	4.51422	5.72382	1.61977	0.843662	0.251633	4.37478	5.86805	0.540525	low
TCGA-A3-A6NN	0.00821918	0	0.235256	2.00251	3.03073	6.66575	3.53491	4.37106	1.95327	2.65273	5.8269	1.21547	0.912461	0.190568	4.02316	5.85626	0.991582	low
TCGA-A3-A8CQ	0.00821918	0	0.438711	3.92171	4.55624	5.89107	4.21603	4.11277	3.39784	4.15395	5.31245	2.68249	1.95627	0.422923	5.07442	6.29828	0.285562	low
TCGA-A3-A8OV	0.931507	0	0.403905	1.72248	3.91382	1.26711	3.67226	1.38479	2.49796	3.20964	5.7687	0.829241	0.981427	0.51533	4.32486	4.69601	0.568495	low
TCGA-A3-A8OW	0.884932	0	0.516177	2.9846	3.47828	6.10913	4.77691	4.02062	2.81165	2.76035	5.57084	1.5165	1.26167	0.919706	4.46838	6.20089	0.66452	low
TCGA-AK-3425	9.1589	0	0.28447	0.534791	3.09289	3.12825	3.75346	5.28607	1.1893	3.07416	6.47648	0.301923	1.10625	0.336375	4.63542	4.1928	1.21839	high
TCGA-AK-3426	2.42466	1	0.0523322	0.410939	4.90245	1.29227	3.91261	1.6052	1.52642	1.05013	6.60421	0.118332	0.260222	0.344801	1.9652	3.64195	4.22329	high
TCGA-AK-3427	9.81644	0	0.664602	3.18113	3.88837	4.26688	4.2874	3.19523	3.15778	4.27387	5.4954	1.40098	2.82344	0.349207	4.36686	3.42489	3.78136	high
TCGA-AK-3428	10.2137	0	0.236533	5.37982	4.60582	6.95624	4.19579	3.04881	3.08288	4.60747	4.79198	3.56039	1.31205	0.177467	4.57946	5.53813	0.47003	low
TCGA-AK-3429	9.11781	0	0.518391	4.30171	3.66425	3.99233	3.89186	4.77149	3.75135	3.47812	4.70646	2.87136	1.3975	0.481509	4.60421	4.75365	1.41269	high
TCGA-AK-3431	6.13973	1	0.193473	3.35996	4.3703	6.73171	4.36909	2.92216	2.57613	3.50241	5.58135	1.85551	1.15903	0.217456	4.10015	5.35378	1.01689	low
TCGA-AK-3433	9.33973	0	0.37512	0.985233	3.59438	1.75476	4.72423	1.97206	2.72813	3.53126	6.10666	0.221135	2.88665	0.195762	4.42103	5.57829	0.550223	low
TCGA-AK-3434	5.71781	0	0.191693	2.34716	4.87006	3.30745	4.7218	3.52673	3.63744	3.96381	4.98896	0.934409	0.477751	0.114779	4.09816	5.33082	0.704913	low
TCGA-AK-3436	9.12603	0	0.442725	4.1435	6.02893	5.82294	2.81383	4.52247	3.34047	4.61806	5.06368	2.61394	0.705925	0.130584	3.60845	3.99103	1.70946	high
TCGA-AK-3440	7.84932	0	0.3982	1.91249	2.64115	6.31311	3.73694	1.31093	2.15727	2.54363	6.02331	0.84795	1.65067	0.155998	3.59633	5.3694	1.50322	high
TCGA-AK-3443	3.89863	0	0.251295	0.969058	3.72675	7.48466	2.38026	2.09368	1.29267	2.38532	5.49293	0.334885	0.465874	0.0716786	3.95689	5.72477	0.561447	low
TCGA-AK-3445	6.55342	0	0.181974	1.43912	4.00993	4.18506	3.99417	2.87079	1.76864	3.33723	5.72788	0.191127	0.800608	0.275651	4.26658	4.47507	1.25544	high
TCGA-AK-3447	3.33425	0	0.194348	0.993321	3.66666	3.74401	4.11546	5.04361	2.07951	2.81838	5.72153	0.283312	0.965383	0.234528	4.07287	2.78644	7.54532	high
TCGA-AK-3450	4.13151	0	0.275679	5.54881	4.39369	6.37636	4.60526	4.88128	3.18345	4.21027	4.47981	4.18595	2.98026	0.870463	4.127	5.17944	1.41367	high
TCGA-AK-3451	7.85753	0	0.665974	1.73019	4.0367	1.22055	2.24009	0.896899	1.63968	2.85148	4.49719	1.67543	2.20334	0.09761	2.47072	3.94262	0.59186	low
TCGA-AK-3453	6.93425	0	0.192675	4.1032	5.40009	4.02	3.74514	3.60702	3.3373	3.69601	5.51691	2.48067	0.894687	0.430909	4.75296	3.78936	2.44122	high
TCGA-AK-3454	2.39452	0	0.314216	0.424074	3.97315	0.492621	3.11613	2.63569	1.48345	3.1732	5.57899	0.206866	1.79056	0.619508	3.54435	4.12848	1.01382	low
TCGA-AK-3455	1.87123	1	0.591074	2.45867	2.98935	3.49354	4.66097	3.6151	2.35419	3.98578	5.11643	1.11585	2.28508	0.0801871	4.88846	4.39753	0.760473	low
TCGA-AK-3456	3.13151	0	0.224678	3.71877	4.4938	2.64745	2.24502	2.15926	3.04683	3.40001	4.66621	5.87925	1.68896	0.197387	3.38016	6.1832	0.0470787	low
TCGA-AK-3458	3.2	0	0.464502	1.15893	3.71103	2.24608	3.96475	3.68684	2.14208	2.83654	6.05123	0.323233	1.17761	0.919654	3.54215	3.67188	3.29606	high
TCGA-AK-3460	6.87123	0	0.324762	2.44777	3.61745	4.43437	4.46577	3.13251	2.4626	3.43928	6.1072	1.26193	2.56287	0.372276	4.71268	5.50083	0.891653	low
TCGA-AK-3461	6.07397	0	0.48772	3.05405	4.41098	5.66507	4.05841	2.49375	3.09321	3.43388	5.25876	1.17698	2.40724	0.272286	4.11678	5.59106	1.14209	high
TCGA-AK-3465	1.01096	0	0.123973	2.40639	4.38201	5.65769	4.17693	1.85654	3.19796	3.48486	5.54529	1.47127	0.741756	0.608474	3.9915	4.59916	1.81926	high
TCGA-AS-3777	3.39178	0	0.0671602	2.93327	4.69121	3.50889	4.41437	1.13873	3.48487	4.71318	6.01328	1.18878	0.56422	0.34244	4.54351	4.30575	1.50469	high
TCGA-AS-3778	0.117808	0	0.381146	2.10198	3.76968	4.65479	4.2775	3.413	3.21529	3.32904	5.33329	0.713932	2.42806	0.195414	4.56882	5.33831	1.47749	high
TCGA-B0-4688	0.276712	1	0.0638097	0.957067	3.02901	1.27291	2.89768	1.9875	2.32394	2.57959	4.69759	0.238043	0.718337	0.0880788	2.89732	3.97351	3.54581	high
TCGA-B0-4690	0.117808	1	0.219489	0.822022	2.50606	7.64253	4.51107	2.78993	2.26818	3.17153	5.52779	0.274436	1.31891	0.644972	3.7327	4.5768	3.18592	high
TCGA-B0-4691	0.380822	1	0.280653	2.26243	3.2703	3.31622	4.03384	4.7787	2.65001	2.78421	6.15922	1.30136	2.15944	0.478558	4.30724	3.72261	6.89355	high
TCGA-B0-4693	0.210959	1	0.215433	2.60545	4.31633	5.04941	4.89423	3.90667	2.48692	4.03639	5.96315	0.840759	1.98805	0.310591	4.30079	5.22622	1.4146	high
TCGA-B0-4694	0.290411	1	0.527937	3.13128	2.96087	4.12163	4.50337	1.29431	2.52289	3.34375	6.22255	2.30168	2.25203	0.239681	4.25539	4.20163	1.13368	high
TCGA-B0-4696	2.3726	1	0.472178	0.741296	4.83016	4.42872	3.84568	3.47061	2.71654	2.89996	5.86659	0.342138	0.804994	1.10538	4.08648	3.01193	3.97939	high
TCGA-B0-4697	1.58356	1	0.330428	3.84544	3.35482	6.50716	2.91803	4.13271	2.88791	3.43184	4.31845	3.65415	3.85047	0.104918	3.10472	4.13133	4.61721	high
TCGA-B0-4698	0.115068	1	0.296132	1.39003	3.76681	4.06496	3.60415	4.03873	2.02197	3.08762	5.59657	0.555468	1.84838	0.427792	4.43316	4.42837	1.83074	high
TCGA-B0-4699	0.30137	1	0.515395	0.395146	2.60297	1.46214	3.28043	3.7676	1.84396	2.49475	5.96064	0.389231	2.23268	0.246482	3.41932	4.66482	1.35667	high
TCGA-B0-4700	5.42466	1	0.237085	1.97132	3.85227	3.39956	4.09001	3.87802	2.50788	3.30407	6.19234	0.803578	1.13138	0.338204	4.33618	4.53687	1.92329	high
TCGA-B0-4701	0.652055	1	0.478723	2.06221	4.26767	3.9721	4.63302	3.3747	3.11703	2.17417	5.21192	1.33562	1.83871	0.281204	3.82858	4.90699	1.24988	high
TCGA-B0-4703	0.49863	1	0.431277	4.08078	3.65405	5.89596	3.31175	3.0975	2.89183	3.27803	4.92128	2.69383	1.78988	1.30779	4.09175	5.47218	1.36634	high
TCGA-B0-4706	0.178082	1	0.506292	2.19228	3.60396	5.93703	3.89621	4.093	3.23983	3.64742	5.68791	1.39923	2.00851	0.260283	4.42881	4.52679	2.03079	high
TCGA-B0-4707	1.64384	1	0.275099	5.16021	3.8607	5.85421	4.01468	2.84939	3.05161	3.57518	5.11705	3.69396	1.08686	0.246918	4.46256	3.7713	2.22579	high
TCGA-B0-4710	4.80822	0	0.889691	0.667255	2.66956	0.634589	3.43921	4.18333	1.79576	3.07566	5.33492	0.268171	3.36433	0.454081	4.26154	5.27457	0.387481	low
TCGA-B0-4712	3.66301	1	0.319661	1.21735	5.76338	3.0178	3.54876	3.16475	2.28332	2.92048	5.72132	0.715507	2.4185	0.233364	3.31388	3.54063	2.87668	high
TCGA-B0-4713	0.553425	1	0.214123	2.29945	3.9436	4.58817	4.432	3.49182	3.26058	3.57298	5.74513	0.645402	1.50093	0.375155	4.77461	3.25124	8.28159	high
TCGA-B0-4714	0.271233	1	0.232624	2.83175	3.78055	6.60494	5.42545	1.60845	3.08094	2.77146	4.86621	0.991548	0.748291	0.554458	3.91066	4.71112	2.36085	high
TCGA-B0-4718	4.87123	0	0.0256152	1.37747	2.41899	1.21647	1.05066	1.59052	2.60732	3.44894	2.11441	1.07139	0.353864	0.161505	2.96687	4.51577	1.12623	high
TCGA-B0-4810	1.30959	1	0.241868	4.63062	4.95378	4.05848	3.28286	4.19356	3.8269	4.38797	4.8051	3.3978	1.61441	0.451032	4.61554	4.82952	1.10206	high
TCGA-B0-4811	3.88219	1	0.106434	0.635004	2.68235	0.124073	2.35889	1.51893	0.748443	1.52245	3.44614	0.148571	0.730664	0.116025	2.20854	3.87718	1.82843	high
TCGA-B0-4813	0.0493151	1	0.45942	2.12476	3.68227	5.30438	3.47842	2.52079	1.78037	2.6038	5.76553	1.23881	2.20532	0.108763	3.94589	2.67401	6.08746	high
TCGA-B0-4814	0.460274	1	0.228778	4.4012	4.89308	5.79724	2.95526	4.57706	3.74932	4.30181	4.9247	2.39926	0.955691	0.417304	4.70931	5.6926	1.1822	high
TCGA-B0-4815	4.35068	1	0.457782	5.5667	4.45439	5.18885	4.1939	6.41611	4.03714	4.37078	5.16107	4.21596	2.03885	0.621096	4.78858	4.1567	2.5438	high
TCGA-B0-4816	3.75616	1	0.0402772	1.71068	4.49478	0.458927	2.2238	1.21576	3.16973	3.24696	3.81253	1.07978	0.295416	0.652121	3.22959	4.90962	0.876279	low
TCGA-B0-4817	2.79178	1	0.350487	3.9993	4.64157	4.73061	4.38345	4.89201	3.24435	4.51361	5.77038	2.75541	2.70681	0.243366	4.22823	3.71095	3.51159	high
TCGA-B0-4818	1.39726	1	0.284526	2.31351	3.21719	5.0025	4.32235	5.10165	2.38179	3.09617	5.74032	1.4944	1.4915	0.182881	4.78323	5.30141	0.937736	low
TCGA-B0-4819	0.50137	1	0	1.00008	3.99025	0.0832265	2.92031	0.0591446	1.2291	1.60878	4.64976	0.0607884	0.68143	0.0162493	1.43701	4.11969	2.60928	high
TCGA-B0-4821	3.36986	1	0.46223	5.03828	4.11453	5.97441	4.68958	3.30473	3.65419	4.28973	4.7175	3.54244	2.32068	0.589764	3.85105	3.68184	3.37853	high
TCGA-B0-4822	3.04384	1	0.304867	4.32042	3.84583	3.62465	3.14167	3.88264	3.30377	4.10848	5.23694	2.88003	1.54292	0.193615	4.70603	4.15312	2.02137	high
TCGA-B0-4823	1.24384	1	0.356073	2.53481	4.0159	7.23505	4.33165	2.68436	2.85869	4.33883	5.04298	1.18011	3.20861	0.189403	3.82344	5.31868	1.52041	high
TCGA-B0-4824	4.53973	1	0.493847	2.15471	2.88844	5.4377	4.7643	4.42461	1.93641	2.97198	5.12311	0.490381	2.20668	0.105365	3.69103	5.06851	1.82894	high
TCGA-B0-4827	2.42466	1	0.557434	2.19174	3.35012	4.86321	4.14749	3.85981	2.59384	2.69322	5.54197	1.46078	2.20075	0.120707	4.2819	5.18657	0.901885	low
TCGA-B0-4828	0.841096	1	0.353101	2.69407	4.57054	4.60568	3.92936	2.60731	2.48506	3.32732	6.09236	1.63819	2.98204	1.81115	4.52949	4.37508	3.10331	high
TCGA-B0-4833	6.53699	1	0.264934	2.60922	3.55025	2.70164	3.53008	2.09059	2.81158	3.11707	4.69867	0.971796	1.15712	0.215626	3.87928	4.63885	1.7527	high
TCGA-B0-4834	5.72603	1	0.144462	2.79498	4.16831	3.63844	2.5442	3.91792	3.68116	3.65155	5.47808	1.34812	1.20629	0.140948	3.87445	5.82555	1.90522	high
TCGA-B0-4836	3.39178	1	0.1084	2.33415	4.65524	4.69036	3.57274	2.53741	3.38363	3.75338	6.06481	1.32596	1.19673	0.310486	4.5683	4.54782	2.09494	high
TCGA-B0-4837	3.77534	1	0.386583	2.13094	3.32736	1.75324	1.83977	1.57087	2.22872	2.45776	4.63183	0.888953	3.03061	0.127993	3.43287	4.56712	2.88293	high
TCGA-B0-4838	2.28493	1	0.325418	3.44949	3.66352	5.38127	3.4737	4.44697	2.5712	2.19404	5.83591	1.82887	0.52024	0.317258	4.62976	5.26028	1.65285	high
TCGA-B0-4839	4.49041	1	0.596772	2.70485	4.24856	6.11565	2.33776	3.15626	1.28041	3.49691	3.95895	2.04499	2.88221	0.178453	3.44531	4.4004	0.732988	low
TCGA-B0-4841	0.558904	1	0.198024	1.49829	3.8984	4.94907	3.79941	1.79047	3.30952	3.67689	5.41049	0.502718	0.324147	0.386503	4.67437	4.15119	1.84421	high
TCGA-B0-4842	4.72329	1	0.371898	1.75514	3.53397	4.5836	3.99082	1.57621	2.18037	3.0007	6.06937	0.56674	0.961033	0.256337	4.01647	2.70342	5.48065	high
TCGA-B0-4843	0.876712	1	0.493317	1.10219	4.12158	1.46684	4.52812	3.86235	2.24946	3.18995	5.15664	0.618641	3.79212	0.427733	4.064	4.68463	0.96403	low
TCGA-B0-4844	0.857534	1	0.263425	1.39957	2.79418	5.76481	3.82936	3.21368	1.35336	2.73481	6.01002	0.341912	0.472532	0.330466	3.6627	3.51114	4.53501	high
TCGA-B0-4845	5.4411	1	0.10708	3.35035	5.42318	5.1646	2.91351	1.65976	4.76337	3.59301	5.287	2.61697	1.35755	0.799138	4.0242	5.20023	2.13279	high
TCGA-B0-4846	3.28767	1	0.108111	1.85922	3.93311	2.02069	4.62025	2.43553	3.51659	3.29487	6.0326	0.886662	1.1996	0.231553	4.13881	5.2163	1.29423	high
TCGA-B0-4847	2.1726	1	0.310318	4.62203	3.44365	7.08981	4.40213	4.50968	2.95768	4.11059	4.00746	2.76156	1.09377	0.129559	4.13057	3.69059	3.3568	high
TCGA-B0-4848	2.41918	1	0.096002	1.54512	2.8863	7.19478	3.40568	4.09423	1.46494	2.75146	4.83234	0.83571	0.811289	0.0128976	3.52177	4.76541	2.09067	high
TCGA-B0-4849	0.189041	1	0.401845	5.13848	5.0563	6.25172	2.9817	4.63429	3.19437	3.52888	4.28671	1.55229	2.58047	0.155333	4.96873	4.92016	4.86882	high
TCGA-B0-4852	3.07123	1	0.37955	2.14364	3.51627	5.83613	3.89981	2.24194	2.06455	3.13727	5.65626	0.984894	1.29554	0.154416	3.87062	4.89403	1.10879	high
TCGA-B0-4945	5.87671	1	0.0317302	1.06428	4.33037	2.4763	4.87427	2.95381	1.91888	1.31084	6.26592	0.0924237	0.342247	0.691768	1.88758	5.66919	2.23125	high
TCGA-B0-5075	1.74521	1	0.663541	2.38082	4.17207	5.95617	3.08937	5.03198	2.63884	2.68903	5.92415	1.60691	2.00386	0.111174	3.70121	4.78852	1.93954	high
TCGA-B0-5077	3.60822	1	0.571113	2.38037	2.55635	5.05529	5.04934	3.10313	1.49172	3.49553	5.15644	1.46383	2.50743	0.283706	4.0652	5.08862	0.46954	low
TCGA-B0-5080	0.936986	1	0.555761	5.1977	4.06973	5.38942	4.03248	5.39914	3.32352	3.77931	4.95275	3.76343	2.15386	0.326429	4.38993	5.57153	0.693592	low
TCGA-B0-5081	0.991781	1	0.459535	1.93145	3.10178	5.90288	4.34473	4.29675	2.07308	2.79298	4.80661	0.456273	1.54477	0.20242	4.38449	4.47757	1.98769	high
TCGA-B0-5083	2.86301	1	0.487174	1.5462	3.41425	4.83729	3.51868	3.52168	2.58854	3.21952	5.32141	0.650744	1.82496	0.458628	4.17609	4.61316	1.77291	high
TCGA-B0-5084	0.608219	1	0.181931	1.68497	2.78318	5.45378	4.61585	4.1375	2.26435	3.2473	5.24861	0.740064	1.58364	0.253923	4.10711	4.95123	1.85618	high
TCGA-B0-5085	2.10959	1	0.481292	2.9225	2.84237	5.30964	3.8241	4.87578	2.71436	4.18746	3.92501	1.58555	2.17383	0.281216	5.24493	3.93015	1.73053	high
TCGA-B0-5088	1.54247	1	0.32005	1.98884	3.51682	6.3533	4.45824	1.77969	2.17716	3.59863	5.02147	0.908344	2.21295	0.367862	3.95726	4.84791	1.16153	high
TCGA-B0-5092	1.25753	1	0.0322965	0.249144	3.2682	0.0177682	2.42581	0.932209	0.590461	1.37931	2.83112	0.0879564	0.579416	0.0535539	1.96166	4.71037	0.590552	low
TCGA-B0-5094	0.912329	1	0.513805	4.80814	3.67744	5.00592	3.92816	5.04682	3.4657	3.33282	5.55795	3.5976	1.12125	0.501637	4.14729	4.08343	2.72449	high
TCGA-B0-5095	0.671233	1	0.0921544	2.19668	5.3749	5.78639	3.97601	3.6777	1.85471	3.02063	6.52901	0.489936	0.585493	0.322423	3.70075	5.31626	1.54677	high
TCGA-B0-5096	0.186301	1	0.16774	3.80677	5.19909	5.91243	4.80871	4.93973	3.285	3.59388	5.34538	2.41243	1.35744	0.232753	3.96629	5.11748	1.51914	high
TCGA-B0-5097	1.82192	0	0.417254	1.44236	4.29959	1.48137	4.58164	2.00917	2.77189	3.60208	6.41037	0.518955	2.48114	0.474121	5.01907	5.60263	0.35771	low
TCGA-B0-5098	4.33973	1	0.374801	2.95076	3.11667	2.44106	4.34902	2.73272	2.43361	2.81043	5.24821	1.73468	0.881288	0.199291	4.25772	4.36279	1.02032	low
TCGA-B0-5099	1.32877	1	0.178277	2.88034	4.27323	6.18789	3.96996	3.93012	2.94078	3.28301	6.1771	1.19642	1.20669	0.181394	4.19829	5.77425	1.70092	high
TCGA-B0-5100	5.2411	1	0.499112	0.66413	3.6247	2.90519	4.41293	5.54317	2.03768	3.61237	5.02185	0.327632	0.81167	0.654125	3.86703	4.16448	0.882008	low
TCGA-B0-5102	7.5726	1	0.241497	1.58804	2.8995	5.78833	4.92815	3.85172	2.13255	2.75251	5.68008	0.475837	1.30478	0.421548	4.22606	4.43409	2.91835	high
TCGA-B0-5106	4.37808	1	0.158065	3.26271	5.01157	4.11164	4.90602	4.3559	4.02092	4.254	5.75557	1.72403	0.856861	0.251566	5.05095	5.08321	1.07946	high
TCGA-B0-5107	2.53973	1	0.32391	4.68317	4.61358	3.90192	3.61519	1.92918	2.97499	3.4628	6.00462	1.71763	1.41021	0.386578	4.84412	3.6148	5.61267	high
TCGA-B0-5108	4.88219	0	0.528817	1.38439	4.95163	4.66943	5.11549	4.68743	2.67195	3.25331	5.95253	0.503619	1.96958	1.29519	4.19096	5.51041	0.79847	low
TCGA-B0-5109	1.60822	1	0.233821	4.33697	4.49115	7.06584	3.66256	4.35763	3.49091	5.15163	4.53637	3.59425	2.39086	0.794768	3.75134	5.31752	1.08707	high
TCGA-B0-5110	5.50411	0	0.272648	1.95596	2.89857	5.32865	3.21585	5.08477	1.60245	2.22063	5.53029	0.757058	0.780537	0.153598	4.53789	6.03991	0.783512	low
TCGA-B0-5113	3.21918	0	0.38946	4.92776	5.73501	1.88923	2.31411	2.72411	3.33427	4.17096	3.98573	2.61617	2.74015	0.0789808	3.92508	5.46838	0.719341	low
TCGA-B0-5115	4.39452	0	0.597715	3.62424	4.09471	5.72537	4.77864	3.88004	3.34793	3.85071	5.27194	2.35601	2.51712	0.563866	4.23337	5.92239	0.552364	low
TCGA-B0-5116	3.49041	0	0.152006	2.38665	4.57214	2.65108	4.58412	3.37796	2.95634	3.50871	6.02744	1.18326	1.14594	0.826519	4.51777	4.96572	1.20411	high
TCGA-B0-5117	4.40548	0	0.331814	1.86258	3.17308	4.70028	3.90063	2.66243	1.80893	2.87809	5.66901	0.998293	2.24323	0.229075	3.97345	4.51667	1.76079	high
TCGA-B0-5119	4.25205	0	0.234283	1.6126	3.21431	5.06773	5.23981	3.20718	3.13749	3.54927	4.93401	0.608419	1.2523	1.31681	4.22392	6.11212	0.78161	low
TCGA-B0-5120	3.20274	0	0.230214	2.15235	3.24086	5.56783	3.70309	2.91627	1.22821	2.6123	5.44088	0.744942	0.534911	0.156977	4.0875	5.33928	0.753654	low
TCGA-B0-5121	4.06849	0	0.391848	2.8847	4.12002	5.14951	5.0446	4.23288	2.9103	3.6895	5.90237	1.40426	2.77011	0.274108	4.75598	5.31519	1.19417	high
TCGA-B0-5399	3.86575	0	0.427883	1.42537	3.5914	1.69594	4.99462	5.36881	1.96461	3.69644	6.44771	0.373956	1.4483	0.522187	5.29503	5.53008	0.332766	low
TCGA-B0-5400	4.74795	0	0.455871	1.36729	3.57322	5.2658	4.57092	3.05956	2.63119	3.53035	5.62233	0.571356	2.61837	0.271339	4.33975	3.47313	3.62516	high
TCGA-B0-5402	3.53425	0	0.925335	4.4848	3.43727	5.86387	4.54842	2.6617	3.17667	3.74254	4.04876	3.20454	2.88742	0.183612	4.19544	5.5588	0.257243	low
TCGA-B0-5690	9.29315	0	0.317047	2.52555	2.76311	5.24583	3.66074	3.68969	2.04773	2.90686	5.49982	1.56069	1.22708	0.424543	4.67565	6.39882	0.376895	low
TCGA-B0-5691	9.4	0	0.381223	4.37392	4.98315	5.34684	4.05693	4.51388	3.57337	4.05007	5.21231	2.78328	2.6439	0.268225	4.15425	6.03123	0.807583	low
TCGA-B0-5692	10.8055	0	0.387024	0.294302	2.42528	0.148821	3.23617	4.24269	1.42185	2.38192	5.45742	0.161077	0.906557	0.602317	3.66772	4.71031	0.867312	low
TCGA-B0-5693	11.1616	0	0.299958	1.71488	3.46172	5.94536	5.32504	5.27731	2.00212	2.99318	6.50003	0.68323	1.12966	0.814226	5.06418	5.97136	0.623821	low
TCGA-B0-5694	1.31507	1	0.721818	1.94539	3.93442	2.86986	4.30665	1.1388	2.97481	3.54325	6.02192	0.663814	2.34269	0.365944	3.8983	5.15781	0.636895	low
TCGA-B0-5695	5.89041	0	0.298444	0.634642	2.82898	2.48294	3.19814	3.3538	2.19271	2.80352	5.22456	0.208112	1.9397	0.0995958	4.2265	5.65564	0.675172	low
TCGA-B0-5696	7.14795	0	0.342341	1.03109	2.7463	3.81428	4.06321	0.786036	2.26584	2.997	5.24427	0.401135	1.77457	0.366541	4.30924	4.85904	0.80657	low
TCGA-B0-5697	7.20548	0	0.41157	0.710082	1.9477	0.974648	1.83023	1.55302	2.0778	1.9311	3.77041	0.237052	0.794697	0.435646	2.83056	5.32285	0.916145	low
TCGA-B0-5698	9.94795	0	0.465711	4.92779	5.1808	4.66145	4.0451	4.69619	2.97313	4.39001	5.75685	3.56728	1.86873	0.225241	4.05562	5.48931	0.442997	low
TCGA-B0-5699	10.5233	0	0.0174638	0.210309	1.6667	0.0159409	2.90998	2.12655	0.398848	1.18962	3.73128	0.0115698	0.637924	0.117387	2.24212	5.47645	0.648949	low
TCGA-B0-5700	4.90411	0	0.226523	1.737	3.98693	1.58709	3.26224	2.36741	1.45809	1.99233	4.63817	0.665597	0.488595	0.391015	2.99224	5.111	0.733814	low
TCGA-B0-5701	6.74247	0	0.367193	0.715146	3.13038	1.77935	4.74302	3.1124	1.97559	2.50507	6.05886	0.28354	1.61563	0.56967	4.28569	5.31832	0.565894	low
TCGA-B0-5702	5.95068	0	0.456062	1.91889	2.25138	7.29993	3.02685	2.87904	1.55905	2.47653	3.64147	1.01827	0.75178	0.0345836	3.80842	3.72932	2.13134	high
TCGA-B0-5703	6.15342	0	0.219188	3.84736	5.01438	7.01433	5.78714	4.60893	2.53847	3.63531	4.83656	2.43989	1.50333	0.329944	4.13385	4.8404	0.921524	low
TCGA-B0-5705	12.4301	0	0.306175	5.10054	4.20684	7.21115	3.64415	5.17628	3.32085	4.05212	4.05272	3.63322	1.76622	0.15485	4.21093	5.83759	0.738039	low
TCGA-B0-5706	8.78082	0	0.237844	3.97111	5.01884	4.39023	4.04907	3.66349	3.32954	4.18582	5.16333	2.56268	2.64028	0.210322	4.2209	4.6045	1.77715	high
TCGA-B0-5707	10.2575	0	0.565866	4.10606	3.80579	3.9479	4.40963	2.82136	3.40787	3.7317	5.44045	3.10619	2.34495	0.316847	4.74537	4.78396	0.667144	low
TCGA-B0-5709	10.8877	0	0.0846212	0.987503	4.61471	1.28653	4.86348	0.3022	2.73314	3.22368	4.09809	0.342361	1.60148	0.161853	3.10255	6.15042	0.210072	low
TCGA-B0-5710	6.65753	0	0.13605	2.25336	3.90146	3.79776	3.56764	4.06004	2.24024	3.10002	5.76731	0.994937	1.19525	0.30137	4.30891	6.12225	0.686203	low
TCGA-B0-5711	10.9288	0	0.0390383	1.53765	6.09054	1.67525	3.00044	1.27881	2.78015	2.6651	4.40089	0.394328	0.516543	0.0628779	3.64332	5.91355	0.326662	low
TCGA-B0-5712	7.45753	0	0.0222288	0.187162	3.00934	0.117687	0.431113	1.76091	0.322002	0.899906	1.55397	0.0293207	0.0158943	0.0308521	1.88588	5.27888	0.466055	low
TCGA-B0-5713	7.62192	0	0.782302	0.934288	2.37902	0.856355	3.24182	5.42297	1.05809	2.40727	4.35501	0.629312	2.46144	0.821785	4.49527	5.84109	0.190329	low
TCGA-B0-5812	10.5041	0	0.357163	1.44321	3.47715	1.30224	3.00764	3.76013	2.63802	3.26447	4.47332	0.507017	0.989689	0.93656	4.07796	5.77576	0.542245	low
TCGA-B2-3923	2.71781	0	0.805399	2.98517	2.43864	5.07832	3.59501	3.9532	1.91408	2.98895	4.43316	2.05242	3.46808	0.345247	3.58704	5.92854	0.503327	low
TCGA-B2-3924	2.99178	0	0.386851	0.853554	3.6545	3.27567	4.64918	2.19456	1.38036	2.96189	6.4121	0.193488	1.09913	0.294727	4.2568	5.58642	0.251493	low
TCGA-B2-4098	0.139726	1	0.208436	4.45687	4.37101	5.12685	3.58145	4.00764	3.00645	3.23582	5.55321	2.81666	0.89581	1.20056	3.97105	3.05957	11.6463	high
TCGA-B2-4099	2.66301	0	0.178914	2.68219	5.61765	3.45596	4.97572	4.50591	3.81593	3.48195	5.71478	1.89956	2.04288	1.41682	4.53447	4.01878	3.72415	high
TCGA-B2-4101	1.77534	0	0.29267	3.93575	3.68411	6.39915	4.18632	4.48513	3.02692	4.07635	5.5106	2.11957	1.47209	0.296438	4.13368	5.78621	1.2536	high
TCGA-B2-4102	2.60822	0	0.59507	1.04384	2.17358	2.21865	3.55653	1.94515	1.29086	3.09336	4.69149	0.444827	2.57888	0.123617	3.96665	5.86988	0.203766	low
TCGA-B2-5633	2.63836	0	0.255337	2.67793	3.65379	5.77434	4.72308	4.51915	3.32823	3.24255	5.44333	1.32797	2.2928	0.260214	4.73988	5.79575	1.49044	high
TCGA-B2-5635	2.06849	0	0.633498	4.20523	2.88995	7.03457	4.2525	3.90184	2.40765	2.92553	4.83871	2.61174	2.73948	0.235254	3.77888	6.02532	0.821177	low
TCGA-B2-5636	2.51781	0	0.272928	1.52933	3.8407	4.81322	3.37925	3.10585	1.70505	3.22296	6.06635	0.58692	1.24165	0.279877	4.14833	6.32014	0.361873	low
TCGA-B2-5639	2.74795	1	0.35346	1.39562	2.93702	3.73898	3.91385	2.73346	1.75767	2.31111	6.18233	0.439256	0.96563	0.38294	3.89587	5.36356	0.951546	low
TCGA-B2-5641	1.79726	0	0.234265	1.86999	2.52045	0.684432	0.968458	0.963962	2.01447	2.78511	2.97091	2.03637	1.74652	0.32123	4.20939	5.56551	0.211936	low
TCGA-B2-A4SR	1.38904	0	0.790026	1.75916	3.61755	5.44621	4.47287	5.28013	2.36983	3.2014	5.30894	0.658514	2.7967	0.383492	4.61942	6.03947	0.423577	low
TCGA-B4-5377	1	0	0.587025	1.80115	2.72419	5.50691	3.72871	2.91275	1.75945	3.05543	4.07426	0.643961	3.03407	0.31977	3.34281	5.33938	1.04705	low
TCGA-B4-5378	0.479452	0	0.200387	3.46517	3.56619	6.76861	4.63142	4.04773	2.87577	3.60324	5.03648	1.64521	0.991815	0.195603	4.31978	5.5833	1.23988	high
TCGA-B4-5832	0.424658	0	0.164006	1.74395	3.98068	6.00298	4.30571	4.55605	1.99869	2.9787	6.05288	0.634325	1.05034	0.478001	3.8502	4.12777	4.27801	high
TCGA-B4-5834	0.10411	0	0.0945169	3.80669	5.99054	1.66083	2.61782	3.64491	2.22919	3.00933	4.15255	3.30601	1.44089	0.178821	4.05673	6.17186	0.123443	low
TCGA-B4-5835	0.0438356	0	0.283204	1.47183	6.13669	8.36502	2.20578	1.57084	1.36283	2.07917	4.03869	0.395588	1.91898	0.817537	1.71062	3.97031	5.89201	high
TCGA-B4-5836	0.386301	0	0.470243	0.920782	3.25947	2.36642	4.88825	4.23103	2.3541	2.9092	5.4433	0.478602	1.55316	0.235723	4.78594	5.60726	0.290451	low
TCGA-B4-5838	0.454795	0	0.585863	3.71325	3.68635	4.13122	4.41368	4.44229	2.43014	2.66996	5.66985	1.66835	2.41373	0.527728	4.42084	5.54809	1.23169	high
TCGA-B4-5843	0.030137	0	0.337811	0.884099	2.62698	3.79469	2.82253	4.10976	1.12554	2.14207	4.79194	0.281119	0.911943	0.444843	3.89099	5.83713	0.526181	low
TCGA-B4-5844	0.0191781	0	0.414983	0.791724	3.74317	1.01745	4.0523	2.31404	2.05778	2.58245	6.10485	0.382315	2.06077	0.536702	4.1775	6.18442	0.252187	low
TCGA-B8-4143	1.94247	1	0.163575	2.06702	4.78163	8.68237	4.46017	1.16987	2.28365	2.86521	4.68002	1.12121	1.65585	0.0231478	2.95917	4.66396	1.84548	high
TCGA-B8-4148	4.16438	0	0.432258	1.87632	3.56026	3.14075	3.03977	5.22405	2.40617	2.89724	5.48663	1.14573	1.78106	0.406712	4.23359	5.64258	0.841223	low
TCGA-B8-4151	3.5589	0	0.0377162	0.948197	1.55	0.979246	2.45564	0.444681	0.764723	1.46111	3.25374	0.211149	0.301521	0.0158715	2.83287	4.45416	1.16678	high
TCGA-B8-4154	3.78082	0	0.621653	2.38596	5.37726	4.56184	3.03587	1.38383	3.32247	3.55848	5.87148	1.50586	2.77494	0.16989	4.58226	4.23663	1.15583	high
TCGA-B8-4619	1.43288	0	0.58688	2.00431	4.05726	3.54151	4.65394	3.15278	2.80857	3.32678	5.92581	1.00532	2.17141	0.479884	4.37407	5.80602	0.412197	low
TCGA-B8-4620	2.12877	0	0.217006	5.69667	5.04014	6.30047	3.59385	4.27354	4.35735	5.25372	4.23999	4.80269	2.63827	0.172621	4.50428	4.47629	1.35528	high
TCGA-B8-4621	2.1589	0	0.379064	0.550124	2.9973	3.21711	3.66328	1.80691	2.8431	3.52194	4.53139	0.573038	2.14831	0.10211	4.30776	5.55625	0.332928	low
TCGA-B8-4622	4.17808	0	1.04993	1.48234	3.17506	4.5376	4.3909	4.87989	2.40158	3.58271	4.96687	0.471455	1.89516	0.290382	4.01073	4.89058	0.48063	low
TCGA-B8-5158	3.33699	0	0.0738202	1.69499	3.69012	3.99318	2.49736	1.18211	1.70333	3.00208	3.32742	1.3336	1.0374	0.418127	3.95668	5.01552	0.414921	low
TCGA-B8-5159	1.97808	0	0.152551	2.23021	3.50136	6.73481	4.43555	4.47849	2.7769	3.19784	5.83694	1.02591	0.663794	1.02123	4.52793	6.50427	0.885026	low
TCGA-B8-5162	0.0986301	0	0.18655	1.57934	4.16337	4.93984	4.37675	2.39348	2.02986	3.24106	5.85125	0.744956	0.631674	0.148078	3.95192	4.9635	0.699754	low
TCGA-B8-5163	2.25205	0	0.0560819	0.605986	6.04052	0.0655654	1.95074	2.00517	1.0044	1.34339	2.49851	0.138924	0.195905	0.016959	1.62026	5.71679	0.229036	low
TCGA-B8-5164	0.0712329	0	0.361834	1.07053	3.08231	0.395497	3.79064	4.58107	2.13847	2.44406	6.25176	0.116642	1.03211	0.685185	3.67728	5.39805	1.28691	high
TCGA-B8-5165	2.01918	0	0.562353	0.864876	3.44769	0.354928	3.23499	1.23686	2.61558	2.93971	5.85281	0.326878	1.65194	1.25083	3.81777	6.02422	0.356301	low
TCGA-B8-5545	4.17808	0	0.252127	1.4406	3.02448	5.56042	4.04409	4.48685	1.66934	3.72007	5.12514	0.65234	0.805748	0.484144	4.2916	5.6848	0.473161	low
TCGA-B8-5546	1.38356	0	0.398739	2.5489	4.46323	4.18655	4.05338	2.56751	2.51881	3.34551	5.67685	1.90705	1.84713	0.826548	3.76818	5.7651	0.432604	low
TCGA-B8-5549	0.531507	0	0.342114	2.33876	5.21843	3.19352	3.40399	2.29945	1.66554	2.80823	6.15058	0.614281	0.685799	0.371144	3.61181	5.52213	0.557578	low
TCGA-B8-5550	4.04384	0	0.209545	1.03823	1.60303	0.262629	0.82131	1.04636	1.67112	2.24942	2.59099	0.540775	1.26955	0.204557	3.69502	6.23011	0.284274	low
TCGA-B8-5551	0.0438356	0	0.257466	2.19842	4.85933	0.763043	4.15661	3.10346	2.09722	3.35465	6.02474	0.255512	0.888535	0.120914	4.52018	5.65424	0.381219	low
TCGA-B8-5553	1.19178	0	0.24806	1.8205	4.49821	5.02265	3.94212	4.28611	3.38324	3.82912	5.95663	0.510546	1.41157	1.31129	4.24682	6.12914	1.45133	high
TCGA-B8-A54D	2.27397	0	0.299295	1.8363	3.24965	5.3728	3.86106	5.5563	1.59652	2.67223	6.20821	0.727197	1.15939	0.574762	4.84619	4.66115	2.1238	high
TCGA-B8-A54E	2.49041	0	0.540878	1.45255	3.1192	4.76102	3.96288	2.88756	2.27099	2.85965	5.92365	0.90414	2.20371	0.119484	3.75009	4.10523	2.18263	high
TCGA-B8-A54F	1.42192	0	0.933607	1.41028	2.24993	3.1895	3.06773	2.9624	2.23372	3.38854	4.20842	0.634956	2.9836	0.269559	3.38944	4.88625	0.763773	low
TCGA-B8-A54G	0.145205	0	0.575821	3.82848	3.91965	3.87668	3.22877	3.45221	3.04318	3.38763	5.49063	2.65645	1.92591	0.3219	4.16961	4.74502	1.14945	high
TCGA-B8-A54H	0.70137	0	0.255614	1.55262	3.51504	4.14576	4.07483	3.40615	2.23358	3.45029	5.89714	0.452552	2.31627	0.507557	3.93278	5.66692	1.22435	high
TCGA-B8-A54I	0.410959	0	0.19728	2.86702	5.27437	7.19559	3.67453	1.8826	2.81066	3.67135	4.8963	1.72008	0.669153	0.402822	3.81612	4.34917	1.40709	high
TCGA-B8-A54J	1.44658	0	0.301166	5.18683	4.38876	3.85269	4.15758	3.09904	3.53168	3.66334	5.26054	3.0863	0.649233	0.262083	4.18979	5.85749	0.589009	low
TCGA-B8-A54K	1.28493	0	0.572276	1.04328	3.05715	5.05606	4.60846	3.87955	1.98271	3.35437	5.88934	0.592456	3.1081	0.200369	4.3139	5.26066	0.716334	low
TCGA-B8-A7U6	1.35616	0	0.304796	1.69425	2.95581	4.88778	3.32847	5.13712	1.63404	2.59234	4.97494	0.510894	2.25997	0.275632	4.29806	5.26064	1.84504	high
TCGA-B8-A8YJ	1.18082	0	0.527631	4.42939	4.65301	6.25086	5.21468	3.50674	3.58768	4.22389	5.18656	3.05903	2.57369	0.362033	4.73043	6.02804	0.321642	low
TCGA-BP-4158	9.25205	0	0.158048	4.17843	4.55362	4.30642	3.63908	2.07279	3.00856	3.47568	4.98669	2.46481	0.745157	0.493172	4.13899	4.92074	1.14574	high
TCGA-BP-4159	7.12603	1	0.19988	3.55858	6.2161	5.97069	4.14289	3.48011	3.2623	4.08938	5.60438	2.28712	1.40525	0.307895	4.41825	4.52764	1.19378	high
TCGA-BP-4160	7.89315	0	0.621611	1.22208	2.94612	4.87873	4.04872	4.74794	2.11772	2.73977	5.60425	0.748295	2.59128	0.13011	4.22487	4.64657	1.43404	high
TCGA-BP-4161	7.52329	0	0.271875	1.44373	2.9766	4.56214	5.22144	4.36134	1.65663	2.22122	5.57834	0.43679	0.575878	0.671355	4.46619	5.33185	0.795849	low
TCGA-BP-4162	8.42192	0	0.364663	0.629254	3.46776	3.20466	4.24112	1.6254	2.0054	2.65297	6.10546	0.0529769	0.718793	0.395088	3.65306	5.9373	0.340601	low
TCGA-BP-4163	7.77808	0	0.48668	1.16198	3.68501	3.87389	2.14297	3.04293	2.28717	2.53897	5.60807	0.368487	0.624362	0.485574	3.90561	5.27556	0.96773	low
TCGA-BP-4164	2.71781	1	0.210011	3.72201	3.76432	3.87864	2.40461	2.09502	2.94602	4.37696	4.97006	2.14365	1.8967	0.109669	4.7906	4.60559	1.40495	high
TCGA-BP-4165	8.32055	0	0.442401	3.24303	3.38571	3.80109	5.40507	3.60163	2.70579	2.80667	5.58671	1.90259	1.98082	0.589767	3.97769	5.00597	1.32637	high
TCGA-BP-4166	0.0356164	0	0.179572	2.2925	5.85384	4.83549	4.52838	2.48585	4.12379	3.97416	5.32379	0.980718	0.802203	1.91658	4.19607	5.0661	1.93068	high
TCGA-BP-4167	7.44658	0	0.116856	0.834134	4.47337	1.08872	1.87696	0.637311	0.594732	1.83013	2.48335	0.334628	1.1881	0.0499583	3.40073	3.77017	0.57724	low
TCGA-BP-4169	1.92055	1	0.457957	1.56879	3.88875	4.75476	4.84286	3.02	2.56702	2.82345	5.96688	0.806961	2.16609	0.970456	4.22443	5.40069	0.956493	low
TCGA-BP-4170	6.41918	1	0.311383	2.26546	3.75015	5.51725	4.36075	4.68512	1.41611	2.74553	5.92819	0.538695	1.32285	0.348886	4.41713	5.23271	1.27495	high
TCGA-BP-4173	5.1863	0	0.328791	4.85481	3.89947	6.58304	3.7023	4.84728	2.21363	3.22285	4.77789	2.7472	0.529015	0.213139	4.26098	4.8115	1.43309	high
TCGA-BP-4174	5.14795	0	0.596594	5.32036	3.88932	4.30403	4.33437	3.03721	3.8218	4.34686	3.91308	4.74194	1.9578	0.306146	4.92921	5.00533	0.192695	low
TCGA-BP-4176	5.35616	0	0.125244	1.21586	5.80042	0.386611	3.51722	4.08352	1.33281	3.14099	5.84236	0.141158	0.847652	0.148239	3.73977	3.98743	1.03461	low
TCGA-BP-4177	4.57534	0	0.582267	3.61013	4.64536	3.65383	4.26075	3.71527	2.928	3.4902	5.85843	2.28902	2.24022	0.467838	4.54986	5.12525	0.652806	low
TCGA-BP-4325	8.12055	0	0.418645	2.0043	3.58317	1.98192	3.7285	4.80338	2.18199	3.05374	6.31347	0.854439	0.43749	0.235398	4.52977	4.70132	0.933343	low
TCGA-BP-4326	4.45205	1	0.108889	1.88427	6.68768	5.22681	2.24693	0.702865	2.75294	2.87603	3.94314	0.96657	0.136395	1.29339	2.45071	4.61139	1.63514	high
TCGA-BP-4327	0.29863	1	0.521289	2.34135	2.79123	6.12733	3.63993	3.04625	1.5065	3.02327	4.64356	1.03834	2.58851	0.0987142	3.73971	4.94572	1.23738	high
TCGA-BP-4329	2.31507	1	0.219355	2.30803	2.42293	5.96434	4.85395	3.20168	1.90069	2.80732	5.00418	1.29977	1.79432	0.594896	3.85943	4.63212	2.3475	high
TCGA-BP-4330	5.1726	0	0.640878	3.72139	3.34522	5.82032	3.9955	3.09743	2.38668	3.50683	5.18302	2.53674	2.63616	0.245854	4.28579	5.49893	0.499132	low
TCGA-BP-4331	6.72329	1	0.170537	1.3913	3.70807	6.80241	3.11153	3.7142	2.51014	3.32532	5.91272	0.629966	0.535906	0.0187776	5.40943	5.18576	0.904164	low
TCGA-BP-4332	3.10411	0	0.113776	0.3641	8.48852	0.260824	4.09631	0.507957	0.554762	3.06965	4.85568	0.275751	1.87806	0.0144684	2.78503	5.23138	0.0554328	low
TCGA-BP-4334	1.76712	1	0.0293912	0.102248	0.997904	0.0635915	2.13712	2.25671	0.304781	0.879486	2.10082	0.0577234	0.127645	0.207539	1.95145	4.21278	1.51927	high
TCGA-BP-4335	1.30137	1	0.380022	4.65633	5.46925	6.5874	1.81378	2.18557	3.77753	4.50396	4.43863	2.91348	1.83557	1.36758	3.45604	4.92202	2.78728	high
TCGA-BP-4337	0.00547945	1	0.276333	3.62471	3.80118	5.52135	4.20128	4.48893	2.44518	3.39056	5.51857	1.84707	0.626585	0.551221	4.53908	4.96857	1.40419	high
TCGA-BP-4338	7.83288	0	0.325296	2.78747	4.49698	4.84765	1.4387	0.81238	2.60604	3.41919	4.03042	2.48612	2.56052	0.0189239	3.52168	4.67968	0.846451	low
TCGA-BP-4340	1.53973	1	0.212204	3.26739	3.56392	6.24536	4.21792	4.92129	2.35985	3.34747	5.6713	1.54197	1.06708	0.229383	4.44861	5.96789	0.988427	low
TCGA-BP-4341	4.35342	1	0.0764511	0.559684	5.10381	0.173344	3.05538	1.1982	1.41798	2.66899	5.37017	0.0438209	0.909023	0.405648	3.43963	5.13185	0.382234	low
TCGA-BP-4342	6.18082	1	0.472534	1.93297	3.63691	2.62455	4.55232	4.30076	2.86576	2.80392	6.07464	1.15893	2.1943	0.338462	4.47553	4.88943	1.26153	high
TCGA-BP-4343	5.23836	1	0.359591	0.390761	3.07353	1.67711	2.6878	2.71507	2.34187	3.02406	5.65589	0.197189	0.769468	0.443379	3.84461	3.54514	2.43776	high
TCGA-BP-4344	4.56438	0	0.37438	2.0299	2.23287	6.10778	4.06747	3.75492	1.97134	2.33092	5.07203	1.02903	1.84377	0.141581	3.60636	5.4573	1.63858	high
TCGA-BP-4345	4.15342	0	0.52398	1.7763	3.58911	5.46623	2.42807	1.82123	1.55136	2.3337	4.3341	0.842038	3.83597	0.111049	4.60084	5.13151	0.891623	low
TCGA-BP-4346	4.09041	1	0.381671	1.9846	3.26679	3.43477	4.36405	4.26492	1.98062	3.22564	5.5288	1.03255	1.21688	0.507512	4.37605	4.99625	0.734134	low
TCGA-BP-4347	3.74521	0	0.687212	4.15997	3.34809	5.40543	4.62848	5.49794	3.18383	3.83882	4.8024	2.94865	2.82132	0.234008	4.20966	5.79817	0.57706	low
TCGA-BP-4349	1.01918	0	0.93134	0.504636	3.41176	5.77937	2.80451	3.84308	1.00659	2.24622	5.38469	0.167646	1.74382	0.292622	4.1362	5.38312	0.281005	low
TCGA-BP-4351	2.65753	0	0.330202	5.29471	4.91792	5.45016	3.36818	3.91284	4.06561	4.4794	4.60293	4.05382	2.86256	0.143006	4.63707	5.08009	1.07711	high
TCGA-BP-4352	0.942466	1	0.589576	3.65003	3.0437	5.30064	3.58046	3.40875	2.97724	3.64956	5.40155	2.02373	1.90852	0.2602	4.15543	4.18485	2.8863	high
TCGA-BP-4353	1.0274	1	0.319765	1.38877	3.85717	2.97997	3.93606	1.82458	2.98272	3.15188	5.82942	0.506607	1.72431	2.26876	4.58071	5.29342	1.567	high
TCGA-BP-4354	2.83288	1	0.294236	4.40789	4.48979	5.46426	2.90619	2.83353	3.15985	3.97071	4.92893	2.86732	0.68283	0.0881258	4.48561	4.9336	0.799946	low
TCGA-BP-4355	2.61096	1	0.187979	2.98391	4.75879	4.15462	3.36814	1.75189	4.4708	3.8362	5.54551	1.9214	2.23374	0.652156	4.46455	5.66662	1.49312	high
TCGA-BP-4756	1.02466	0	0.663031	1.05829	3.16922	1.70729	3.54611	0.929048	1.9534	3.08827	5.48475	0.428846	2.42362	0.19632	3.94835	6.81831	0.0948045	low
TCGA-BP-4758	6.04932	0	0.349257	0.805249	2.88577	6.03006	4.19746	1.76336	2.32513	2.9246	5.27213	0.571193	1.7074	0.826859	4.0417	4.86078	1.22584	high
TCGA-BP-4759	6.49863	0	0.613158	1.35727	3.61217	3.03562	3.3889	3.90356	2.94025	3.15896	5.97312	1.16341	1.82234	0.367449	4.76152	4.92623	0.653386	low
TCGA-BP-4760	6.46849	0	0.631604	4.47777	3.42924	3.9368	3.81665	3.35288	2.48921	3.25781	5.19166	3.65391	2.07023	0.278595	4.32758	5.63855	0.247873	low
TCGA-BP-4761	0.49863	0	0.392107	2.4289	4.65141	1.07519	3.35979	1.89228	3.1933	3.91324	5.75647	1.44696	2.91392	0.617812	5.18435	3.63658	1.80166	high
TCGA-BP-4762	3.67945	1	0.311436	1.21165	2.42183	5.71915	4.71121	5.45838	1.73541	2.91836	4.82371	0.524949	1.01499	0.281697	3.84161	5.0347	1.22304	high
TCGA-BP-4763	3.47945	1	0.797279	1.93887	4.70719	2.52103	4.30986	3.33885	3.40726	2.86523	6.03695	1.1634	2.36636	0.638172	3.72154	5.10544	0.856278	low
TCGA-BP-4765	5.98356	0	0.181698	3.51531	3.90423	6.65542	4.90961	3.8805	3.03362	4.11487	4.67037	1.90234	1.08525	0.163646	3.93456	5.54272	0.933152	low
TCGA-BP-4766	4.00548	0	0.130851	0.480531	3.36948	0.142659	3.9499	1.1542	0.750711	2.22	5.47992	0.0322375	1.39936	0.151883	3.10925	5.60541	0.30128	low
TCGA-BP-4768	1.09589	0	0.490191	1.30582	3.34728	3.33172	3.96546	3.5856	1.82066	3.31007	5.56516	0.865084	2.42521	0.365435	3.75639	5.09416	0.673062	low
TCGA-BP-4769	5.13973	0	0.499154	3.47398	2.3777	6.41848	2.81055	1.29417	2.08494	4.41558	3.66388	2.48742	1.30844	0.101579	3.34207	5.26851	0.362519	low
TCGA-BP-4770	0.90137	1	0.353872	2.22682	3.31	5.847	4.59946	3.15337	1.72356	2.89961	5.38388	0.754128	0.854631	0.0918208	4.54392	3.99779	1.6253	high
TCGA-BP-4771	0.443836	1	0.194339	2.15264	3.94829	2.12981	3.40169	3.05366	1.77317	2.33919	5.25384	0.769295	0.604184	0.361074	3.40401	5.0456	1.20033	high
TCGA-BP-4774	5.16438	0	0.304402	3.08024	4.11458	5.56481	2.30013	3.22891	2.83288	3.60466	5.07544	1.71613	1.73574	0.145428	3.44621	5.46332	1.68572	high
TCGA-BP-4775	5.04932	0	0.355106	2.49113	4.69739	5.83082	3.74123	3.00939	3.43975	3.76558	5.2542	1.17686	1.25929	1.16244	4.12087	5.7997	1.02705	low
TCGA-BP-4776	1.12603	0	0.169658	2.15821	3.20164	4.58295	4.00549	1.74771	2.16073	3.09135	4.99151	0.908861	0.81626	0.120168	3.44923	4.79014	1.39553	high
TCGA-BP-4777	4.74247	0	0.339483	2.17519	5.01077	3.9678	4.90404	2.93031	3.16042	4.00616	6.06019	0.863454	2.40694	1.36453	4.48653	4.62869	2.01396	high
TCGA-BP-4781	5.69863	0	0.255311	4.71221	5.27994	6.4482	4.42643	4.77922	3.30888	4.89064	5.54387	3.34404	1.68184	0.61624	3.91053	4.9546	1.25491	high
TCGA-BP-4782	0.969863	0	0.397467	2.23066	4.05077	3.25006	3.93182	1.0943	1.92275	2.88907	5.63866	0.868856	1.13909	0.425613	3.9792	5.7493	0.330497	low
TCGA-BP-4784	5.07945	0	0.584561	1.79243	3.082	3.80732	4.2498	4.73236	2.12603	3.06392	5.26926	0.673137	1.80351	0.83073	3.44196	4.97001	1.57952	high
TCGA-BP-4787	1.31507	1	0.337288	4.4681	5.29507	4.43548	2.68151	5.1167	3.4649	4.03978	4.6214	2.9182	2.37178	0.113004	4.48518	4.4048	2.22333	high
TCGA-BP-4789	4.07945	0	0.0162262	0.238037	3.97921	0.0866658	2.5332	2.89488	0.736346	1.02679	2.03493	0.369206	0.0902538	0.130236	1.50454	6.0875	0.20027	low
TCGA-BP-4790	3.04384	1	0.22636	1.44234	3.42597	4.43233	4.43318	3.43605	2.5826	3.39561	6.21701	0.479963	2.58923	0.191428	4.17864	5.45907	1.61817	high
TCGA-BP-4795	1.69863	0	0.871417	1.86429	3.06674	2.24064	3.82154	1.94118	2.47623	3.36161	5.49058	1.08855	3.06965	0.282741	4.44088	6.07438	0.174023	low
TCGA-BP-4797	3.03288	0	0.492104	3.90641	4.47242	5.65105	4.45761	4.26121	2.93783	4.04793	5.1682	2.41934	2.60538	0.193409	4.90514	5.51475	0.519351	low
TCGA-BP-4798	0.915068	1	0.449179	1.58299	3.67166	5.22841	4.44003	4.61197	2.96005	3.28906	5.56328	0.937085	2.19278	0.286033	4.63399	4.56111	1.74494	high
TCGA-BP-4799	3.10411	1	0.138771	2.59556	4.1888	5.24984	4.15103	3.37435	2.7597	3.90023	5.92263	0.919277	0.812602	0.61078	4.67341	4.15449	3.14363	high
TCGA-BP-4801	3.07945	0	0.277023	4.01044	3.85417	3.0917	4.54924	4.73657	3.33761	3.70769	5.56558	2.58807	1.17798	0.48986	4.15095	6.02936	0.640137	low
TCGA-BP-4803	0.558904	0	0.281719	0.990995	3.53112	0.386155	4.28994	0.600012	2.29501	2.95076	6.21743	0.185066	1.16452	0.249899	4.28174	5.16513	0.426556	low
TCGA-BP-4804	3.99726	0	0.466243	4.41488	3.60743	4.88269	3.95768	3.36351	3.29537	3.46261	5.59598	3.36753	1.67979	0.529656	4.85165	4.74526	1.01802	low
TCGA-BP-4807	0.578082	0	0.157381	1.76021	4.44347	5.20715	2.47737	2.51007	2.72647	3.21549	4.64233	1.27909	1.63283	0.606782	4.22936	5.09973	1.14066	high
TCGA-BP-4959	7.28767	0	0.41046	2.67189	3.7328	6.91928	3.96263	2.56114	2.88841	3.39738	5.28119	1.08076	0.927925	0.165683	4.19871	5.04267	1.32941	high
TCGA-BP-4960	5.95068	0	0.444291	4.86464	3.85439	4.77871	4.15515	3.34381	2.96742	3.20427	5.11698	3.31296	1.59799	0.150133	4.10447	3.98151	2.07397	high
TCGA-BP-4961	5.30137	0	0.190778	2.70611	3.81321	4.44962	3.38166	2.74924	3.036	3.68809	5.38394	1.67593	2.25255	0.549833	3.65001	6.23072	0.961583	low
TCGA-BP-4962	4.89041	0	0.286451	3.01985	4.32403	3.73901	3.34871	5.13876	3.01894	3.1538	5.23041	1.6457	1.8634	0.199055	4.3874	4.58329	2.76506	high
TCGA-BP-4963	5.02466	0	0.286658	2.16962	4.37668	6.2013	3.73158	2.07528	3.50053	3.51884	5.56333	0.722205	1.33992	1.05033	4.51612	5.2176	2.09834	high
TCGA-BP-4964	5.10137	0	0.721802	1.24127	4.68773	3.41768	3.73998	5.01064	2.23691	2.69804	4.98087	0.679762	2.14197	0.131963	3.9513	5.12712	0.468345	low
TCGA-BP-4965	5.12603	0	0.101522	0.7882	4.08948	0.676815	3.97648	1.38107	1.71823	3.46121	5.21192	0.467561	2.8042	0.111826	4.56904	5.91042	0.17594	low
TCGA-BP-4967	0.561644	0	0.228303	2.58145	3.87552	7.07282	2.94249	0.86247	2.32091	2.88587	4.29099	1.04654	1.96618	0.15236	3.77233	4.72402	2.31154	high
TCGA-BP-4968	4.78356	0	0.757405	2.32302	3.39071	5.05214	3.53455	3.17857	2.39957	2.87777	5.33636	1.33435	1.8751	1.34362	3.89091	4.5909	1.6243	high
TCGA-BP-4969	4.91507	0	0.456551	2.51217	3.73068	5.78331	4.14169	3.55536	3.15243	4.02118	4.92983	1.5054	2.57207	0.315815	3.88189	5.30672	1.15821	high
TCGA-BP-4970	1.1863	0	0.433634	1.72951	3.87464	3.82854	4.50847	2.53338	2.38926	3.12659	6.23572	0.536388	0.933891	0.577357	3.93809	5.93722	0.457427	low
TCGA-BP-4971	4.07397	0	0.257932	1.05853	3.40954	1.78376	4.06395	4.68359	2.1524	3.11382	5.90484	0.52093	0.964322	1.20159	4.25361	4.63366	1.47801	high
TCGA-BP-4972	4.11507	0	0.193931	1.74135	4.19831	3.65007	3.74512	1.12251	2.03212	2.95728	6.20244	0.715528	0.759486	0.715313	4.01745	5.72069	0.504941	low
TCGA-BP-4973	3.79178	0	0.513626	4.8046	3.33833	5.05952	4.51773	3.52882	3.07995	3.39278	5.40135	2.92929	1.86837	0.216184	4.82569	5.58591	0.684704	low
TCGA-BP-4974	0.578082	1	0.388175	2.49935	3.00884	5.27193	5.15262	4.05914	2.63524	3.23432	5.22584	1.42438	1.73604	0.816469	4.4464	6.03254	0.590142	low
TCGA-BP-4975	3.92603	0	0.103112	3.79168	6.31284	6.02039	1.46269	4.87355	2.99112	3.5837	5.98035	3.13559	2.09141	0.088534	3.1808	5.60298	1.79858	high
TCGA-BP-4976	4.47123	0	0.281422	1.31654	3.90195	5.59108	4.3216	1.83312	1.54626	2.16631	6.22517	0.55194	0.807524	0.198114	3.34412	5.68792	0.597814	low
TCGA-BP-4977	1.24384	0	0.239335	3.16147	4.08217	5.52417	3.6445	2.50396	2.7098	3.17134	5.00024	1.25234	0.680458	0.799595	3.60499	4.45305	3.54671	high
TCGA-BP-4981	3.00548	1	0.305829	1.95414	4.82974	5.30803	4.03788	4.33341	3.75546	3.8975	5.8342	0.982047	0.385393	0.815502	3.98773	4.09282	3.5719	high
TCGA-BP-4982	2.77808	0	0.221741	2.38926	2.84275	6.54596	4.00552	4.38015	2.35663	2.57352	5.31345	0.960219	0.511141	0.616317	3.77494	6.08247	1.49128	high
TCGA-BP-4983	3.87123	0	0.13745	2.59773	6.1972	4.60109	4.57962	3.1752	4.7414	4.69163	5.61318	1.75196	1.99401	0.848102	4.98289	5.91093	0.622992	low
TCGA-BP-4985	2.60822	1	0.429154	2.44767	3.79828	4.66034	3.52962	3.61744	2.12004	3.73756	5.79597	1.18768	1.69925	0.758471	3.83685	4.98247	1.3352	high
TCGA-BP-4986	2.15068	0	0.58572	4.29712	3.57958	6.49663	4.06979	3.7108	3.96851	4.01486	5.04699	3.18001	2.12871	0.200867	4.69463	5.25716	0.866799	low
TCGA-BP-4987	3.07945	0	0.284951	3.43089	4.19721	4.83822	3.14932	2.59246	3.54246	4.24736	4.52353	1.51665	1.46911	0.244716	3.61741	5.76976	1.17934	high
TCGA-BP-4989	0.323288	0	0.607335	1.15632	2.51621	3.31117	3.43941	3.14868	1.20091	2.3973	5.39283	0.30925	0.771969	0.109829	3.90691	4.62804	0.659352	low
TCGA-BP-4991	3.87123	0	0.270342	3.53166	3.86635	5.20182	2.44097	2.59182	3.18813	3.80241	4.90431	1.97079	1.18988	0.386695	3.93808	6.01292	0.903931	low
TCGA-BP-4992	1.3726	0	0.419607	2.81451	3.07059	2.75718	4.05598	5.46647	1.88457	2.83421	5.91105	1.619	1.13095	0.629772	4.6405	3.24293	3.76658	high
TCGA-BP-4993	0.484932	0	0.657715	5.87092	4.71999	4.69859	4.06248	4.07834	3.81942	4.57552	4.89803	4.89307	2.93279	0.198924	4.65805	5.95333	0.188003	low
TCGA-BP-4994	3.58356	0	0.211262	1.91092	3.95245	4.25835	4.82006	5.0044	2.18849	3.20048	6.22207	0.483465	0.950146	0.466436	4.45255	5.49057	1.07019	high
TCGA-BP-4995	3.75616	0	0.179868	3.57723	4.2142	7.45793	3.83027	2.94958	3.78163	4.91774	4.28994	1.84311	2.6125	0.239795	3.94638	5.57928	1.88445	high
TCGA-BP-4998	2.55342	0	0.41947	1.303	3.53734	4.7128	3.17822	3.6737	2.15365	3.33673	5.21113	0.615934	2.21604	0.0641366	4.47311	5.31611	0.705416	low
TCGA-BP-4999	3.46849	0	0.124462	2.30152	2.39478	2.14121	1.36968	2.68278	2.17708	2.89815	3.04948	1.45936	1.46454	0.160391	3.12031	6.06454	0.721546	low
TCGA-BP-5000	1.54247	0	0.473866	1.19204	2.91513	3.51539	3.31118	2.7754	1.88164	3.17832	4.83547	0.87616	0.905113	0.716135	4.57893	4.45138	0.549678	low
TCGA-BP-5001	3.22466	0	0.17077	2.83467	2.9116	4.65729	4.73655	3.3513	2.35993	2.55094	5.39442	1.69197	0.633232	0.181926	4.11702	4.38998	2.03092	high
TCGA-BP-5004	3.08493	0	0.506419	3.12607	3.50252	6.55056	3.938	5.512	2.37957	2.9897	4.86719	1.66615	2.32856	0.230154	4.13908	5.51577	1.37552	high
TCGA-BP-5006	2.30137	0	0.523122	3.11801	3.1579	5.82811	3.72538	3.55393	1.73768	2.89684	5.11706	1.56884	2.13286	0.601813	4.46847	5.338	0.908525	low
TCGA-BP-5007	3.12329	0	0.22094	2.62946	3.80235	6.50186	3.56279	2.76335	2.66965	3.28147	5.10317	1.83643	1.21471	0.138542	4.40266	5.44825	0.705231	low
TCGA-BP-5008	2.93425	0	0.140669	3.54147	5.83952	5.86928	4.3482	3.70783	3.46293	3.87792	6.07561	1.84506	1.13554	0.449762	4.52453	5.55726	1.09473	high
TCGA-BP-5009	2.99178	1	0.494757	3.10556	3.90375	6.11147	3.7794	2.83596	2.61963	2.84034	5.76685	1.67634	0.74096	1.52	4.51913	4.26349	2.56381	high
TCGA-BP-5010	2.40548	1	0.170763	1.66672	5.21895	5.93196	2.67341	1.6247	2.96701	2.65442	4.81849	0.907268	2.73215	0.120964	4.1817	4.31146	3.25202	high
TCGA-BP-5168	4.00822	1	0.332054	2.39962	3.22763	6.29813	4.02094	1.90219	2.56255	2.70783	5.39644	1.41276	0.798784	0.413185	4.48819	5.24216	0.832987	low
TCGA-BP-5169	0.528767	0	0.0630707	0.227564	4.32851	0.188753	2.05317	1.3041	1.08473	1.99593	1.22536	0.219842	1.21323	0.0565714	2.0559	3.67666	0.828235	low
TCGA-BP-5170	6.60822	0	0.367462	1.27512	4.14474	1.31675	4.00684	3.95048	2.40663	3.16251	5.77909	0.616603	1.28607	0.543984	4.41787	4.8403	0.687838	low
TCGA-BP-5173	0.169863	1	0.306141	2.74507	4.60577	6.35536	3.72765	3.77851	2.72404	2.67301	5.61907	0.801992	1.78221	0.190346	4.59583	5.32298	2.19569	high
TCGA-BP-5174	6.18356	0	0.242895	4.88854	4.73443	5.07181	4.65683	4.87501	3.36825	4.0467	4.5445	3.816	2.92058	0.313606	3.95551	5.39612	0.911775	low
TCGA-BP-5175	2.55342	0	0.143378	1.12903	3.40442	4.76942	3.51333	1.53855	1.77947	2.50916	5.62283	0.461836	0.521873	0.145737	3.91074	3.18398	3.67673	high
TCGA-BP-5176	4.35616	1	0.342217	0.639009	3.2997	0.956267	3.64414	1.84291	1.64196	3.23536	6.39998	0.349746	1.42007	0.334417	4.03522	5.54196	0.282296	low
TCGA-BP-5177	0.80274	0	0.4311	1.66445	2.86356	5.00276	3.98128	1.36622	2.03214	2.93595	5.4704	0.821716	0.576304	0.778778	3.6505	5.62939	0.494444	low
TCGA-BP-5178	5.23836	1	0.0258991	1.88492	4.64137	7.23632	3.27796	1.35905	4.59113	2.91554	5.14032	0.930085	1.03338	0.321516	4.61084	4.06838	8.09683	high
TCGA-BP-5180	6.2	0	0.395491	5.8495	5.27484	6.12757	3.8435	6.21551	4.23335	4.85885	4.62413	4.42848	2.18555	0.687201	4.61414	4.46899	1.99819	high
TCGA-BP-5181	4.09589	0	0.33075	2.2448	4.40258	3.78541	3.48338	3.02423	3.51415	3.7457	5.66765	0.645667	0.663964	0.949754	4.53472	5.5635	1.11905	high
TCGA-BP-5182	3.19178	0	0.761411	1.37792	4.01225	0.8555	4.87169	4.24979	2.28178	3.28134	5.85509	0.408774	2.2512	0.263627	4.22343	5.24754	0.325255	low
TCGA-BP-5183	3.53699	0	0.0246366	2.70176	6.68457	5.67618	3.77804	4.20908	1.59774	2.66733	5.62447	0.780222	0.467249	0.112262	3.61208	5.25124	1.10807	high
TCGA-BP-5184	3.10411	0	0.266649	2.11997	3.14749	6.20663	4.99891	5.08609	1.98904	3.14286	4.5096	0.684838	1.01543	0.209365	3.51273	5.8891	0.843423	low
TCGA-BP-5185	3.10137	0	0.227682	5.52711	6.62355	4.77925	3.29779	6.1072	5.16696	4.83643	4.67428	4.62268	0.995384	0.466331	5.31676	3.52415	2.15872	high
TCGA-BP-5186	1.89863	0	0.513339	2.68207	3.22633	5.97212	4.59969	4.4256	2.41828	2.93146	5.20267	1.65139	2.18505	0.160168	4.10474	6.03036	0.564701	low
TCGA-BP-5187	1.11233	0	0.336536	1.17676	3.45715	4.22106	3.91609	1.65521	2.2281	3.62161	5.40652	0.713276	2.28462	0.785053	4.10796	5.56671	0.523552	low
TCGA-BP-5189	2.25205	1	0.359252	2.16552	3.32622	5.32097	3.83562	3.3195	2.3741	3.18464	5.02995	1.00141	2.38673	0.253859	4.1089	5.64407	1.00508	low
TCGA-BP-5190	2.76986	0	0.550935	2.70744	3.31074	4.14733	4.11081	4.95965	2.06135	3.17675	5.47659	1.61275	2.6509	0.545945	4.34741	5.07551	1.0837	high
TCGA-BP-5191	2.64932	0	0.272612	0.911441	3.83508	2.00987	4.46913	2.67657	2.05651	3.1173	6.59414	0.314725	0.564533	0.706409	4.66689	3.70133	1.36329	high
TCGA-BP-5192	1.95616	0	0.268278	3.88241	3.1434	6.50974	4.56065	3.72605	2.53599	3.64129	5.01028	2.38054	1.60768	0.170032	4.01929	5.74676	0.831993	low
TCGA-BP-5194	1.11781	0	0.212019	1.42758	3.37537	5.9674	3.5482	4.34273	2.45171	3.64771	4.98992	0.454547	0.700927	0.16178	4.62613	5.89966	0.583094	low
TCGA-BP-5195	2.05205	0	0.179841	0.67877	4.7946	1.69043	4.83146	4.15646	1.96005	3.11193	6.18059	0.438198	0.632062	0.283277	4.48932	5.35746	0.254393	low
TCGA-BP-5196	2.78904	0	0.598621	2.83353	3.50888	5.85284	4.33464	3.33718	2.66482	2.79458	5.14859	1.46252	1.68756	0.42779	3.98993	4.77384	1.51009	high
TCGA-BP-5198	1.65205	0	0.381895	3.44304	4.41707	6.16496	4.28952	4.03811	3.14819	3.43527	4.71428	1.74868	1.60753	0.730475	3.93764	4.87933	2.21714	high
TCGA-BP-5199	3.71233	0	0.239164	1.99939	4.28931	5.75825	4.32148	4.0678	2.3917	3.38853	5.51951	1.29849	1.11481	3.13736	4.05003	5.12551	2.31624	high
TCGA-BP-5200	2.91233	0	1.09725	1.63481	2.63219	1.80025	3.89783	2.74401	1.82777	2.92547	5.90762	0.874846	1.96078	0.225775	5.06575	5.82879	0.0849747	low
TCGA-BP-5201	2.60548	0	0.305696	5.59896	3.79789	5.15454	4.00519	4.33754	1.44577	2.5404	4.14975	3.73181	1.25497	0.22772	3.56877	4.94869	0.855977	low
TCGA-BP-5202	0.0794521	0	0.501127	3.45175	3.39485	4.6318	4.1736	2.81843	2.39616	3.28506	5.52532	1.75769	1.04304	0.615764	4.3374	5.78153	0.483109	low
TCGA-CJ-4634	9.58356	0	0.282813	1.24657	3.44954	5.00286	4.32183	2.6218	2.41536	3.82639	6.3758	0.307288	2.85465	0.579055	4.15392	6.06677	0.932636	low
TCGA-CJ-4635	3.87945	0	0.391068	1.81772	3.37274	4.79728	2.98412	2.49488	2.27531	2.34349	5.28204	0.406677	1.12125	0.264191	3.59364	4.86695	2.38002	high
TCGA-CJ-4636	5.27123	0	0.311662	4.583	3.40863	6.42134	4.37664	4.0552	2.46392	3.3858	4.77903	3.38895	1.51352	0.187328	4.27477	4.7354	1.04846	low
TCGA-CJ-4637	6.10137	1	1.2315	2.39885	3.06829	3.99923	4.10602	4.65356	2.41654	3.32769	5.1727	1.20717	2.57968	0.781198	4.18324	4.77753	0.583594	low
TCGA-CJ-4638	1.18082	1	0.1988	2.47242	4.9271	5.7737	2.77221	2.6893	3.09782	3.0316	4.7753	1.25129	0.485998	0.141219	4.08427	4.01907	2.82307	high
TCGA-CJ-4639	8.84658	0	0.0453718	1.80066	3.45239	5.72461	3.88202	1.24329	1.97828	2.37942	5.7236	0.747564	0.251563	0.263207	2.77568	5.67578	1.30908	high
TCGA-CJ-4640	9.53425	0	0.433287	3.23595	2.92514	5.9286	4.59065	2.87405	2.15633	2.93363	5.78774	1.87788	2.08794	0.176184	4.22207	5.06615	1.22935	high
TCGA-CJ-4641	4.55068	1	0.331851	2.5639	3.78737	4.93659	4.94488	4.71689	2.17358	2.69686	6.06676	0.85113	0.926431	0.773424	4.44855	5.17423	1.5855	high
TCGA-CJ-4643	4.91233	0	0.859351	4.42389	3.97852	5.82504	4.59639	2.87419	3.23873	3.70314	4.10481	3.07427	2.85973	0.297338	4.17372	5.8459	0.239929	low
TCGA-CJ-4644	0.920548	1	0.448711	3.09423	3.79821	4.57534	3.67027	3.99302	2.5784	3.76081	5.20096	2.18735	2.43611	0.168375	3.56145	5.02154	1.10242	high
TCGA-CJ-4868	1.76986	1	0.25686	1.69588	4.19371	4.87694	3.92936	2.13961	2.79501	3.78868	5.22718	1.11771	0.444393	0.411364	4.01774	5.15346	0.494671	low
TCGA-CJ-4869	6.99726	0	0.159515	2.20806	4.76073	5.03802	3.77719	3.80099	2.68028	3.35138	5.82014	1.2959	0.521808	0.39119	4.27261	4.69303	1.33798	high
TCGA-CJ-4870	4.10411	0	0.132991	2.15248	3.38604	7.3807	3.44886	2.24239	1.77128	2.84489	4.12321	0.803096	0.351153	0.0938492	3.67012	5.52609	0.8101	low
TCGA-CJ-4871	6.63836	0	0.649651	2.56456	4.74078	2.08516	4.05875	3.62122	3.26351	3.73545	5.87728	1.45068	3.10476	1.89841	5.32738	5.12284	0.885476	low
TCGA-CJ-4872	3.93151	0	0.235343	3.35514	3.38507	5.08037	3.55857	3.48147	2.93164	3.39075	5.88476	2.19481	0.555569	0.763784	4.79168	5.33802	1.07185	high
TCGA-CJ-4873	4.86575	0	0.243768	2.16723	2.96605	5.37396	4.18857	3.85713	1.93937	3.88576	4.34586	0.799167	2.5274	0.156109	3.62499	3.44785	5.62299	high
TCGA-CJ-4874	6.25479	0	0.469454	1.91413	3.0563	4.44532	4.22809	4.43312	2.2851	2.42727	5.51427	0.95565	2.30271	1.18679	4.01292	5.0871	2.38348	high
TCGA-CJ-4875	9.73699	1	0.342006	5.52566	6.06153	4.17179	3.35412	5.17335	4.14441	4.66793	4.68389	4.91822	3.15177	0.0397432	4.46938	4.1665	1.15796	high
TCGA-CJ-4876	5.35616	0	0.104755	0.72201	4.9665	0.220204	1.43285	1.02926	3.08086	4.3077	2.61214	0.534189	0.190356	0.437055	3.00417	5.30196	0.242906	low
TCGA-CJ-4878	5.98904	0	0.255161	1.68321	2.87345	6.77621	3.63813	2.89089	2.14676	2.62598	5.64345	0.677698	1.42171	0.302825	3.75961	5.16611	2.37743	high
TCGA-CJ-4881	5.51781	0	0.232823	1.18144	4.33153	2.45435	4.25095	5.52534	1.93525	2.69755	5.59802	0.668127	0.628517	1.00123	4.15364	4.33286	1.43802	high
TCGA-CJ-4882	5.1589	0	0.377253	4.1979	3.49704	4.3329	3.57331	4.19578	2.10191	2.99164	5.00791	2.25507	0.624965	0.374975	3.83045	4.98729	1.25957	high
TCGA-CJ-4884	4.81918	0	0.120299	0.666962	3.00605	2.86503	4.59337	2.93025	2.18928	3.39303	5.19271	0.27701	0.884432	0.21017	4.39142	5.13051	0.521504	low
TCGA-CJ-4885	9.45479	0	0.189853	2.66547	4.44306	5.77628	3.7714	3.81294	3.10963	3.78997	5.62335	1.08828	0.85467	0.347028	4.47932	4.58522	2.56095	high
TCGA-CJ-4886	5.34795	0	0.465543	2.18304	3.60717	5.16398	3.46153	1.71496	2.67125	3.50036	5.27028	1.64515	2.01316	0.0938355	4.16391	5.7051	0.35931	low
TCGA-CJ-4887	2.55342	1	0.217644	2.36256	2.34579	5.78762	4.33569	1.24171	1.44365	4.07145	4.27589	1.21894	2.26542	0.0358865	3.18697	4.53485	1.21305	high
TCGA-CJ-4888	4.29315	1	0.586498	5.42617	4.07085	5.58378	3.76452	4.48078	3.5856	4.36325	4.76163	4.41458	2.96823	0.261406	4.48644	4.57046	1.04236	low
TCGA-CJ-4889	5.33151	0	0.36051	4.5404	4.88999	5.25988	5.4012	5.85807	3.28403	3.95391	4.89284	2.49754	1.98899	0.312807	4.1668	5.55427	1.01881	low
TCGA-CJ-4890	9.6411	0	0.268017	0.705268	3.51392	5.27325	3.63782	5.09916	1.43786	3.11971	4.90111	0.739572	1.24471	0.177814	4.28755	4.62224	0.706466	low
TCGA-CJ-4891	2.24384	1	0.260332	1.17332	3.44165	5.49575	4.2826	4.97158	2.55532	3.11628	5.40705	0.413475	0.716369	0.35382	4.86269	3.58497	3.4486	high
TCGA-CJ-4892	4.16712	0	0.343861	5.59007	3.26525	6.20356	4.27581	4.70716	2.63997	4.37575	4.68794	4.23405	1.53987	0.243998	4.19712	4.83444	0.826014	low
TCGA-CJ-4893	2.05479	0	0.410959	1.40409	3.71451	5.93334	4.3377	2.58912	3.0085	3.38826	5.79418	0.379282	2.17631	1.64772	3.8746	5.73447	1.86645	high
TCGA-CJ-4894	2.30411	1	0.149974	1.51185	4.94619	1.98795	1.67559	2.00224	3.00973	4.17771	4.6682	0.449908	0.381119	0.16401	3.07674	5.43991	0.733232	low
TCGA-CJ-4895	3.28767	1	0.25098	3.86408	4.71064	1.93864	3.19337	3.06263	2.99452	3.76907	5.83855	1.86837	1.73467	0.356688	4.36912	4.39829	2.37099	high
TCGA-CJ-4897	9.15342	0	0.355101	2.7197	4.5635	4.53021	4.36187	3.02857	3.29107	4.35337	5.2102	1.29172	3.35925	0.21739	3.78381	5.80438	0.990377	low
TCGA-CJ-4899	4.1863	0	0.235778	3.69802	2.60181	3.98373	1.21551	0.556635	2.33538	4.43247	2.61931	0.526249	1.04047	0.158148	4.32383	6.0697	0.680803	low
TCGA-CJ-4900	4.69589	1	0.471544	2.62605	3.16466	7.36571	4.54011	3.00879	3.0719	4.38199	5.1792	1.34117	3.25208	0.418308	3.85714	4.63931	3.14256	high
TCGA-CJ-4901	3.9726	0	0.0353736	1.01339	4.5597	2.84444	3.75332	0.520109	2.0501	2.65963	4.85172	1.33135	0.363895	0.195512	2.95354	4.70072	0.417023	low
TCGA-CJ-4902	4.16438	0	0.139748	2.87811	3.35123	6.10654	3.87761	2.8164	2.31343	3.10205	4.9757	0.75846	0.3384	0.398992	4.24836	5.26311	1.75469	high
TCGA-CJ-4903	4.27397	0	0.168672	0.491285	4.61996	0	4.15342	1.35772	1.14491	0.796745	4.8404	0.167353	1.0806	0.302267	1.70999	5.29771	0.638857	low
TCGA-CJ-4904	9.04658	0	0.399614	1.14137	3.45698	4.67761	3.54727	3.49428	2.46713	2.69483	5.48688	0.502893	1.39585	0.897205	4.15429	5.83514	0.816679	low
TCGA-CJ-4905	4.09863	0	0.133457	2.92711	4.71015	5.04815	3.14531	2.65621	2.88134	3.66651	5.67011	1.19164	0.630078	0.647697	4.37669	6.36649	0.620181	low
TCGA-CJ-4907	4.10685	0	0.521794	0.541027	2.42225	5.96968	3.00572	3.07316	1.57044	2.22901	5.56123	0.101074	1.63403	0.178834	3.63905	5.97976	0.693175	low
TCGA-CJ-4908	4.19452	0	0.125022	4.32913	2.9919	6.00852	3.58983	1.7749	3.03796	4.376	3.34077	3.10306	2.03241	0.063512	3.48412	5.95266	0.555054	low
TCGA-CJ-4912	4.53973	0	0.251323	0.590434	3.72336	0.275664	1.28454	0.802789	1.29236	1.59331	3.66297	0.551673	0.405973	0.193746	2.73937	3.82923	0.982436	low
TCGA-CJ-4916	3.76164	0	0.29805	3.60817	5.94036	6.4415	3.50104	3.19854	2.26144	3.18545	5.91392	2.10188	1.35453	0.153353	3.51802	4.90589	1.25515	high
TCGA-CJ-4918	0.254795	1	0.427279	5.12211	6.70985	3.37421	3.18292	5.78963	2.46307	3.44966	5.30824	3.10287	0.899161	0.103611	4.52073	5.4127	0.344027	low
TCGA-CJ-4920	0.380822	1	0.180116	1.46336	3.77534	6.50821	4.34039	1.55005	2.08183	2.51234	4.55825	0.5619	2.02556	0.0758635	2.92414	5.72096	1.05372	low
TCGA-CJ-5671	10.9233	0	0.92124	2.21448	3.3161	5.06437	3.49651	4.27229	2.36484	3.02598	5.30796	1.00113	3.94707	0.128707	3.97334	5.19713	1.27103	high
TCGA-CJ-5672	5.40274	1	0.422959	3.54821	3.35626	4.52035	4.45594	6.0424	2.58279	3.34833	5.34183	2.09438	2.68371	0.8107	4.04674	5.38117	2.06499	high
TCGA-CJ-5675	10.7836	0	0.828356	4.10396	3.81606	4.18303	3.93961	3.02951	3.23652	3.66247	5.37911	3.17308	2.46658	0.351281	4.30266	5.1596	0.41297	low
TCGA-CJ-5676	11.1425	0	0.419861	2.50881	3.23371	5.6377	4.18205	3.95467	2.1324	2.82484	4.93477	1.02725	1.18348	0.610788	4.12424	4.8442	1.61458	high
TCGA-CJ-5677	2.14247	1	0.365292	1.53344	3.71592	4.8251	3.55911	3.79044	2.65352	3.43107	5.9329	0.471318	0.783222	0.34617	4.57894	4.72001	1.44983	high
TCGA-CJ-5678	1.5726	1	0.18871	4.53966	5.21363	4.29904	3.34411	3.19608	4.48753	4.6521	5.35096	3.04625	1.44256	0.583237	4.57306	4.04562	3.34627	high
TCGA-CJ-5679	1.86027	1	0.364472	0.819441	4.37815	3.5997	3.19602	3.02011	3.06095	2.98062	5.94613	0.176341	0.404655	2.05979	3.91099	4.06148	4.33829	high
TCGA-CJ-5680	2.10411	1	0.108695	1.2036	4.02124	1.50249	3.35939	1.41915	2.72858	3.18204	4.27159	0.430466	0.622291	0.490815	4.04771	5.84637	0.321262	low
TCGA-CJ-5681	1.51233	1	0.444659	3.15926	4.02426	6.03184	4.16481	3.98952	3.3051	3.889	4.95913	1.75114	1.90913	0.272852	3.66132	5.97433	0.854949	low
TCGA-CJ-5682	10.2356	0	0.322686	2.18637	3.34999	5.04842	3.76755	3.1174	3.32448	3.71467	5.24127	1.44262	2.53431	0.253904	4.69717	5.24087	1.24968	high
TCGA-CJ-5683	5.17534	0	0.229502	2.85703	3.61253	5.53688	4.36489	2.75434	2.40782	2.93749	5.89455	1.22757	0.581901	0.556648	3.76962	5.38459	1.46698	high
TCGA-CJ-5684	6.11233	0	0.17943	2.10864	3.79914	4.10293	4.42619	1.70656	2.66409	3.42662	5.95287	1.23864	0.536259	0.286421	3.63363	5.563	0.578811	low
TCGA-CJ-5686	5.58356	0	0.390939	5.27521	3.62888	4.93302	4.21317	3.67084	3.19271	4.15198	5.25979	4.08988	0.495022	0.108765	4.76281	5.41336	0.278687	low
TCGA-CJ-6027	9.90411	1	0.442609	2.98922	3.81466	2.33085	4.09733	3.81523	2.71821	3.14978	5.91997	1.79611	0.994707	1.14272	4.57911	4.03685	1.87652	high
TCGA-CJ-6028	4.45205	1	0.254002	3.31605	4.66366	5.60653	3.49166	3.67539	3.37797	4.26081	5.51837	2.09566	0.623688	0.616016	4.33994	4.87641	1.27298	high
TCGA-CJ-6030	6.29863	1	0.580107	1.9406	2.77958	4.22256	3.62757	4.09835	2.54181	3.20134	4.78492	0.778425	2.01777	0.323087	4.80259	4.94716	1.03682	low
TCGA-CJ-6031	5.22192	0	0.337474	1.16082	3.19309	1.26363	3.81776	3.2789	2.56392	4.25611	5.66852	0.653503	1.36036	0.158871	3.55302	4.76266	0.795047	low
TCGA-CJ-6032	9.96986	0	0.191524	1.83048	4.33139	3.68746	4.35941	2.67356	3.19053	3.73637	6.45224	0.62997	0.524987	0.356125	4.4423	6.15724	0.47295	low
TCGA-CJ-6033	0.613699	1	0.518781	3.92178	3.66504	5.28302	4.23114	4.86656	2.18611	2.51986	5.81889	2.46106	1.81274	0.589736	4.35041	4.49862	2.11719	high
TCGA-CW-5580	5.38082	1	0.119018	1.10937	3.97944	4.31495	3.96111	5.02683	1.73153	1.66091	6.27682	0.51693	0.431624	0.673937	2.17379	5.84094	2.20696	high
TCGA-CW-5581	7.66849	0	0.311338	1.91618	3.88958	4.03837	3.96302	2.96513	2.68242	3.04161	6.0264	0.646347	1.04525	0.667167	4.45072	6.02858	0.656757	low
TCGA-CW-5583	6.81918	0	0.0643903	0.261081	4.2051	0.144964	3.86929	3.08337	0.991763	2.65114	5.51747	0.0877001	1.32147	0.150523	3.35064	6.18315	0.183333	low
TCGA-CW-5584	0.449315	1	0.340502	2.44061	3.70888	6.30784	3.75341	2.70649	2.32118	2.70771	5.04471	0.957406	1.91526	0.211316	3.5914	5.96171	1.08847	high
TCGA-CW-5585	7.14795	0	0.683446	1.42959	2.75195	2.39245	2.94805	3.23403	1.66415	2.28416	4.69075	0.693653	1.69109	0.246945	3.9892	6.20677	0.214398	low
TCGA-CW-5587	6.09863	0	0.436431	2.8776	4.92165	7.38895	3.15642	2.16567	2.15264	3.22296	5.15226	1.51853	2.20592	0.190324	3.62145	6.17472	0.491236	low
TCGA-CW-5588	5.52603	0	0.617691	1.8194	2.84664	3.96974	4.00091	2.99077	1.80845	3.22006	5.46058	1.0634	2.73702	1.87347	4.26597	5.05656	1.07294	high
TCGA-CW-5589	6.51507	0	0.510416	4.57849	3.91505	5.93605	3.18383	3.18976	3.36621	3.96841	4.48117	4.11607	2.20905	0.164612	4.48135	5.99432	0.220839	low
TCGA-CW-5590	2.94521	1	0.369643	1.82205	2.57165	6.62347	3.61922	2.66267	2.1007	2.31123	4.60067	0.899164	1.55468	0.0687185	4.47152	5.52848	0.821958	low
TCGA-CW-5591	6.22192	0	0.758712	2.79989	3.48781	5.05591	4.07883	3.52103	1.98938	3.23145	5.63778	2.32973	2.40637	0.372041	4.69633	6.24005	0.122299	low
TCGA-CW-6087	0.112329	1	0.690479	3.6725	3.99243	5.42977	3.91338	4.04651	3.06744	3.37441	5.77058	2.20444	1.82599	0.214396	4.20905	4.88829	1.21336	high
TCGA-CW-6088	8.8274	0	0.107907	0.557317	2.24608	0.110645	1.34103	0.78575	0.897185	1.43941	2.45966	0.206696	0.549974	0.0851733	2.3006	6.72218	0.178656	low
TCGA-CW-6090	6.99178	0	0.0753919	0.259509	4.52379	0.0247084	2.52942	1.38229	0.148222	0.622517	2.49205	0.0268391	0.208332	0	0.982119	4.4923	0.618321	low
TCGA-CW-6093	8.61918	0	0.48362	0.66595	2.99411	0.891953	4.31458	2.9609	2.08891	3.10587	6.26692	0.170564	0.996964	0.399062	4.37024	6.10902	0.184118	low
TCGA-CW-6097	1.56438	1	0.347631	3.15574	5.07074	4.26733	3.5742	2.44881	3.75985	4.12218	5.54672	1.418	0.819672	1.20073	4.27758	5.75218	0.876026	low
TCGA-CZ-4853	2.12055	0	0.111856	0.942659	2.99934	0.64164	3.14288	1.50687	2.21729	3.71751	3.90502	0.577249	2.27182	0.602147	5.43796	5.39611	0.25436	low
TCGA-CZ-4854	3.84658	1	0.377655	3.39494	3.99012	5.37904	3.79412	4.54293	2.31099	3.51539	4.85946	1.78078	2.12019	0.204861	4.57305	4.7033	1.45386	high
TCGA-CZ-4856	0.0493151	0	0.5985	2.3915	3.92287	4.04628	3.42508	4.33472	3.37062	3.63343	5.74437	1.29419	3.00652	0.176493	4.77409	5.55556	1.00236	low
TCGA-CZ-4857	3.92329	1	0.634262	1.17011	3.20967	5.48933	3.65737	1.53375	2.44627	2.77314	5.4763	0.413115	2.23512	0.540857	3.84042	4.47709	1.76868	high
TCGA-CZ-4858	5.76712	1	0.276036	4.60322	4.07959	5.29286	3.63289	3.56439	3.34861	4.01394	4.82397	3.51362	0.804006	0.228028	4.83799	4.29471	0.993654	low
TCGA-CZ-4859	4.89589	0	0.228052	2.22699	3.19094	6.54042	4.40981	1.22622	2.91582	3.44368	5.1296	1.13482	2.94931	0.720848	4.26659	5.87619	1.23711	high
TCGA-CZ-4860	0.564384	1	0.0899252	2.45572	5.33942	2.06505	2.78003	1.29334	3.14748	3.0983	4.41427	0.96417	1.22205	0.573724	2.81812	5.22276	1.67194	high
TCGA-CZ-4861	1.22192	1	0.289264	1.13777	4.20021	3.78015	3.22971	3.0518	2.87239	3.41328	5.86523	0.627085	0.414286	2.87055	3.78728	4.69751	2.99461	high
TCGA-CZ-4862	8.96164	0	0.491521	2.83342	3.81572	4.35312	4.75535	3.99884	2.39668	3.23918	5.67223	1.09931	2.65248	0.54611	4.34307	5.52962	1.07786	high
TCGA-CZ-4863	5.28219	0	0.252794	3.15585	3.04986	4.51396	2.59002	4.51894	2.26679	2.62873	5.87778	1.88413	0.436397	0.366582	4.52918	5.47581	1.30201	high
TCGA-CZ-4864	3.60274	1	0.370577	5.0732	4.53186	4.4085	3.80652	4.42972	4.61015	4.43937	4.41157	4.01992	2.4582	0.284294	5.65544	5.3645	0.558381	low
TCGA-CZ-4865	0.454795	1	0.0650904	0.549709	3.50477	0.0871245	2.40122	1.65205	1.17781	1.14049	3.41549	0.104605	0.494906	0.248671	1.69727	5.1595	0.988839	low
TCGA-CZ-4866	8.95068	0	0.340351	0.495959	2.32122	4.13051	4.16037	4.89439	1.26876	2.30409	5.00883	0.217699	1.20205	0.723872	4.66527	5.4315	0.555547	low
TCGA-CZ-5451	5.28493	0	0.330061	1.37555	3.45486	3.98717	3.9571	3.42852	2.53191	3.04783	6.21401	0.519161	1.03573	0.489581	4.10479	5.75195	0.808205	low
TCGA-CZ-5452	4.90137	0	0.212458	2.06275	8.08322	0.931158	2.42841	2.40166	3.3881	4.2189	6.17179	1.44443	0.458961	1.5838	3.80183	4.80234	0.561762	low
TCGA-CZ-5453	6.6274	1	0.414196	1.29671	3.32316	5.13522	3.63189	2.78533	2.09612	2.87414	5.61272	0.592708	2.30279	0.378836	3.87908	5.1283	1.32657	high
TCGA-CZ-5454	1.97808	1	0.334238	2.71753	4.73716	1.04614	3.79825	1.89406	2.59448	3.12922	5.93948	0.760962	0.670238	0.664511	4.51445	4.61045	1.02146	low
TCGA-CZ-5455	1.53699	1	0.308021	1.96972	4.37469	4.34708	3.7379	4.72453	3.17567	2.83079	5.82079	1.15412	1.12325	1.54235	4.55714	5.53972	1.56439	high
TCGA-CZ-5456	6.63562	0	0.219223	0.944601	3.4793	3.03045	4.20539	1.34482	2.12164	2.81604	6.63629	0.455418	1.70556	0.289764	3.99493	3.97554	2.20421	high
TCGA-CZ-5457	7.54521	0	0.292088	2.8951	3.64538	7.36726	3.12439	4.19602	2.35477	3.21662	4.87622	1.64028	0.559573	0.122546	3.96073	5.5401	0.981586	low
TCGA-CZ-5458	7.6411	0	0.398793	2.09321	3.44092	3.43973	3.6121	3.43122	3.02021	2.73615	5.85404	0.844405	0.54071	0.473908	4.16593	5.38412	1.2298	high
TCGA-CZ-5459	4.61096	0	0.296434	1.48812	3.07453	5.86357	4.18797	3.44516	1.59378	3.89735	5.48999	0.595325	0.445977	0.177093	3.95699	4.74838	0.741484	low
TCGA-CZ-5460	7.87123	0	0.207215	2.61611	3.70408	5.65945	3.35197	2.62151	2.61212	3.39744	4.98577	1.85707	2.05827	0.259019	4.12636	4.95832	1.34898	high
TCGA-CZ-5461	0.90411	1	0.259255	3.22665	3.77906	5.74811	3.57857	4.39031	2.65049	3.09948	5.4398	1.70606	1.62787	0.590662	4.25663	5.17209	2.40929	high
TCGA-CZ-5462	0.852055	1	0.407942	2.36592	4.13964	6.41614	2.73195	2.24461	3.03205	3.1943	5.4271	1.21694	1.57373	0.187079	3.62785	4.60248	2.83912	high
TCGA-CZ-5463	1.8137	0	0.295619	2.53667	4.323	3.24477	4.04207	3.94921	3.0716	3.21766	5.68906	1.6193	1.17806	0.350821	4.2347	5.10761	0.974518	low
TCGA-CZ-5464	5.83014	0	0.282155	2.65838	3.15352	5.61712	3.75926	3.16723	2.53241	3.18477	5.71975	1.12517	0.371746	0.231408	4.15315	4.50542	2.40228	high
TCGA-CZ-5465	7.02466	1	0.394676	2.68343	3.2876	4.57018	3.9307	4.96089	2.73858	3.14573	5.60986	1.44582	1.8918	0.718871	4.19469	5.33662	1.9094	high
TCGA-CZ-5466	1.87671	0	0.319177	0.663579	3.67177	0.232994	4.31039	2.7247	2.73893	3.44249	6.10768	0.246461	1.91933	1.3562	4.75208	4.70342	0.998945	low
TCGA-CZ-5467	0.2	1	0.136377	1.74785	4.59505	5.46762	2.91388	2.23523	3.11154	3.67571	4.73048	0.758066	1.05232	0.427644	4.31044	5.10012	1.21036	high
TCGA-CZ-5468	0.161644	1	0.187374	2.46903	2.63373	6.94192	3.89302	3.00913	1.64409	1.70076	4.40016	1.34749	1.72521	0.137828	3.80305	4.17076	4.29878	high
TCGA-CZ-5469	2.59178	1	0.442342	1.12927	2.37335	4.43448	4.27679	3.62009	1.20279	3.13492	5.1568	0.257176	2.42893	0.225502	4.12229	4.21975	1.56129	high
TCGA-CZ-5470	1.05753	0	0.745903	2.06483	3.36756	3.61818	4.2217	5.48898	2.89241	3.421	4.99802	1.24261	1.88101	1.32904	4.78731	4.98406	0.836853	low
TCGA-CZ-5982	6.68219	0	0.281289	2.42426	3.60237	6.24867	3.15277	4.26547	1.98824	3.07525	5.37237	1.4573	0.907263	0.0426011	3.63622	5.9213	0.706723	low
TCGA-CZ-5984	5.66301	0	0.0946268	0.670991	3.43463	0.300907	2.62881	0.277938	1.53911	2.0168	5.96045	0.234469	0.289452	0.483488	3.20272	4.96385	0.831366	low
TCGA-CZ-5985	5.47123	0	0.409641	2.02645	2.76312	5.79033	3.06339	4.74057	2.16863	3.09689	4.62873	1.27209	2.87458	0.374367	4.01031	5.52498	1.48864	high
TCGA-CZ-5986	1.02192	0	0.102688	1.41763	3.3373	4.53189	4.10039	5.07731	2.37429	2.64945	5.97068	0.658393	0.719524	0.188244	4.32739	5.92425	0.982776	low
TCGA-CZ-5987	1.21918	1	0.589744	2.00122	3.67188	4.30051	4.73196	3.38537	2.59712	3.58603	5.92094	1.34832	2.42226	0.505628	4.82782	4.38178	0.886723	low
TCGA-CZ-5988	1.89863	0	0.697244	2.76996	3.2845	3.12425	4.40504	1.67884	2.46924	3.13958	5.57546	1.52758	2.14322	0.119696	3.99442	5.69748	0.30613	low
TCGA-CZ-5989	5.21918	0	0.400309	2.81634	3.51158	4.92552	3.88552	2.17355	2.08617	3.26663	6.07346	1.70564	0.863594	0.156039	4.0338	5.06675	0.631948	low
TCGA-DV-5565	3.6411	0	0.427302	2.45	3.08177	3.91418	2.65181	1.44893	1.80556	2.84503	4.28116	1.48416	2.06261	0.21728	3.95484	5.51463	0.447999	low
TCGA-DV-5566	3.83014	0	0.455788	3.29487	3.72895	3.60039	4.25871	3.74638	2.62793	3.42236	6.14972	1.9292	1.60457	0.704226	4.29492	5.18936	0.991122	low
TCGA-DV-5567	5.49041	0	0.466997	0.713859	3.21175	1.28151	3.70565	2.73561	1.74554	2.83756	5.60683	0.314982	0.832282	0.329842	4.08261	5.74841	0.200585	low
TCGA-DV-5568	1.0137	0	0.15898	1.9049	3.91437	4.42078	4.16567	3.50865	1.95499	2.75994	5.70818	0.649641	0.890282	0.367422	4.61314	4.90629	1.19177	high
TCGA-DV-5569	0.972603	0	0.224777	3.01162	4.26178	4.099	4.27048	1.70913	3.14737	3.6223	5.52787	1.69124	0.720637	0.297918	4.43958	5.55248	0.48704	low
TCGA-DV-5573	3.09589	0	0.285273	3.89739	4.57722	6.1835	4.33371	3.88053	3.59424	3.77587	4.94385	2.20597	1.83748	0.217919	4.19501	5.291	1.58953	high
TCGA-DV-5574	5.52329	0	0.381855	3.8499	4.14095	4.32812	2.49525	2.71137	2.11057	3.36372	3.62441	2.15701	1.95573	0.0485185	4.52363	5.66738	0.348735	low
TCGA-DV-5575	4.73699	0	0.0681709	0.937141	1.82861	3.51999	0.389664	0.268342	1.80562	2.19729	3.6781	0.578766	1.07952	0.299766	3.50124	5.83008	0.943378	low
TCGA-DV-5576	1.99178	1	0.2754	5.21702	5.68646	3.48809	3.82347	4.09282	4.30069	4.40688	5.65865	2.24214	0.762572	1.14396	5.07532	5.60939	1.56941	high
TCGA-DV-A4VX	4.45479	1	0.260394	1.94594	3.80196	6.59145	3.72788	1.1261	3.01396	4.1079	5.24333	0.762474	0.709351	0.366401	4.1617	3.81472	2.54365	high
TCGA-DV-A4VZ	1	0	0.396525	2.2651	3.34189	6.78075	2.45681	1.9999	1.06972	2.83823	5.2326	1.1793	0.803919	0.0725936	3.00143	3.61991	2.83869	high
TCGA-DV-A4W0	6.76712	0	0.215581	4.87981	6.93655	3.10853	3.18305	5.29133	4.2905	5.19133	4.95746	3.76405	1.86452	0.648305	4.82896	5.87265	0.32294	low
TCGA-EU-5904	1.50959	0	0.185921	1.47422	2.58441	4.10326	3.99943	5.51599	2.09838	3.4181	5.57222	0.872068	0.925376	0.660529	3.85463	6.13776	0.753705	low
TCGA-EU-5905	0.326027	0	0.358682	1.91991	3.40259	5.32388	3.99511	2.46758	2.33231	2.61898	5.314	0.965975	1.4918	0.189101	3.53723	5.39847	1.05793	low
TCGA-EU-5906	0.564384	0	0.377687	0.638026	3.29762	0.942181	3.35734	1.17587	1.96642	2.6971	5.72543	0.273927	1.98506	0.31201	3.83369	6.04174	0.277365	low
TCGA-EU-5907	0.347945	0	0.379034	3.06229	3.61852	5.4615	4.41974	2.77133	2.95806	3.71874	5.53722	1.47274	1.99318	0.35731	4.09852	4.71297	2.12678	high
TCGA-G6-A5PC	0.663014	1	0.415848	2.04869	3.44504	4.37506	3.79461	5.17365	2.84557	2.79073	5.76293	0.977857	2.31557	1.82107	4.4316	3.89307	10.5618	high
TCGA-G6-A8L6	0.857534	1	0.461648	1.50193	3.82697	2.83044	4.99249	2.68009	2.09092	3.38836	6.14669	0.950354	3.35811	0.773854	4.27501	4.77734	0.885795	low
TCGA-G6-A8L7	5.84384	0	0.036293	0.317551	5.8253	0.0249313	2.18697	1.68305	0.364975	0.752471	2.19817	0.0181104	0.113422	0.110757	1.74917	2.30742	2.20872	high
TCGA-G6-A8L8	2.98904	1	0.73557	0.857382	2.39918	6.50918	5.03516	5.57535	1.92115	2.90637	5.34589	0.605715	1.68952	1.26871	4.56269	4.54686	1.17378	high
TCGA-GK-A6C7	0.167123	0	0.483315	2.54935	3.67826	5.07699	4.1093	3.92118	2.20304	3.10664	5.66959	1.23957	1.6459	0.17948	4.6946	5.90115	0.426966	low
TCGA-MM-A563	1.61918	0	0.190829	1.75689	4.05063	4.91192	4.8272	4.29706	2.52412	3.7288	5.71547	0.974262	1.29319	0.221145	4.46977	5.13726	0.794338	low
TCGA-MM-A564	1.66301	0	0.238312	2.84576	4.26354	4.81586	3.59964	2.68869	3.14241	3.63901	5.68575	1.68827	0.781344	0.197565	4.17205	4.45093	1.72296	high
TCGA-MM-A84U	1.91781	0	0.190115	1.99911	5.00387	2.27233	3.38675	2.31907	3.48705	3.80844	5.82146	1.17453	2.18794	0.692271	4.29015	4.93649	1.46543	high
TCGA-MW-A4EC	1.36438	0	0.160614	3.55929	3.99128	3.81766	4.25317	4.38404	3.07322	3.68839	5.2689	2.3047	0.57323	0.162193	4.58409	4.73608	1.07786	high
TCGA-T7-A92I	0.975342	0	0.100296	2.77837	4.34222	6.7119	4.73629	3.31558	3.37455	3.35175	5.46419	0.708103	0.212767	0.712743	4.00497	6.28813	1.37508	high
Note: In "fustat" column, 0 and 1 represent alive and dead, respectively.
