# Supplementary material for: Clinical significance of nonerythrocytic spectrin Beta 1 (SPTBN1) in human kidney renal clear cell carcinoma and uveal melanoma: a study based on Pan-Cancer Analysis
Source: BMC Cancer. 2023 Apr 3;23:303. doi: 10.1186/s12885-023-10789-3 (PMC10071745; doi:10.1186/s12885-023-10789-3)
Supplement: Supplementary file 6 — Supplementary Material 6 [file 12885_2023_10789_MOESM6_ESM.xlsx]

## Sheet: Sheet1
revised_Suppmentary File 6 Detailed information about the prognostic risk model based on SPTBN1 expression in KIRC.
id	futime(year)	fustat	SPTBN1	riskScore	risk
TCGA-3Z-A93Z	1.05479	0	5.28151	0.877907	low
TCGA-6D-AA2E	0.991781	0	6.11499	0.518725	low
TCGA-A3-3306	3.06849	0	4.47273	1.46281	high
TCGA-A3-3307	3.93425	0	5.23356	0.904886	low
TCGA-A3-3308	0.0438356	0	5.2776	0.880078	low
TCGA-A3-3311	3.26301	1	4.99011	1.05521	high
TCGA-A3-3313	2.0137	1	6.2672	0.471203	low
TCGA-A3-3316	4.09041	0	4.8717	1.13712	high
TCGA-A3-3317	4.08493	0	5.42883	0.799941	low
TCGA-A3-3319	3.09589	0	4.24877	1.68496	high
TCGA-A3-3320	4.13151	0	5.87487	0.603628	low
TCGA-A3-3322	4.04932	0	5.48134	0.773857	low
TCGA-A3-3323	3.03014	0	5.36329	0.833734	low
TCGA-A3-3324	3.24932	0	5.16327	0.945947	high
TCGA-A3-3325	3.20548	1	5.06443	1.00685	high
TCGA-A3-3326	3.11507	0	5.4105	0.80925	low
TCGA-A3-3328	3.79452	0	3.98677	1.98801	high
TCGA-A3-3329	4.44932	0	4.77948	1.20528	high
TCGA-A3-3331	3.44384	0	5.58514	0.724775	low
TCGA-A3-3335	5.16712	0	4.19983	1.73783	high
TCGA-A3-3343	2.58904	0	5.11613	0.974519	high
TCGA-A3-3346	0.375342	1	2.93982	3.84997	high
TCGA-A3-3347	4.41096	1	4.80162	1.18855	high
TCGA-A3-3349	3.79452	0	5.80271	0.631763	low
TCGA-A3-3351	2.49315	0	5.47483	0.777045	low
TCGA-A3-3352	1.53699	1	5.50819	0.760855	low
TCGA-A3-3357	7.36438	0	4.77674	1.20737	high
TCGA-A3-3358	3.58082	0	4.73391	1.24046	high
TCGA-A3-3359	6.86027	0	5.25988	0.889975	low
TCGA-A3-3362	4.27123	0	5.67748	0.683734	low
TCGA-A3-3363	0.873973	0	3.70189	2.37971	high
TCGA-A3-3365	2.39178	0	5.20972	0.918607	low
TCGA-A3-3367	6.21918	0	5.77222	0.644042	low
TCGA-A3-3370	6.23014	0	5.59427	0.720608	low
TCGA-A3-3372	2.0137	0	5.75319	0.651824	low
TCGA-A3-3373	4.4411	0	5.24212	0.900012	low
TCGA-A3-3374	3.6	0	4.47966	1.45642	high
TCGA-A3-3376	4.64658	1	6.32744	0.45362	low
TCGA-A3-3378	1.72603	0	4.57318	1.37293	high
TCGA-A3-3380	1.55342	0	4.97496	1.06535	high
TCGA-A3-3382	1.5726	0	4.71802	1.25296	high
TCGA-A3-3383	2.3589	0	4.2416	1.6926	high
TCGA-A3-3385	5.46027	0	4.54686	1.39593	high
TCGA-A3-3387	1.69041	0	5.52039	0.755014	low
TCGA-A3-A6NI	2.78904	0	5.1864	0.932231	low
TCGA-A3-A6NJ	1.28219	0	5.65382	0.694022	low
TCGA-A3-A6NL	1.88767	0	5.86805	0.606233	low
TCGA-A3-A6NN	0.00821918	0	5.85626	0.610761	low
TCGA-A3-A8CQ	0.00821918	0	6.29828	0.462047	low
TCGA-A3-A8OV	0.931507	0	4.69601	1.27049	high
TCGA-A3-A8OW	0.884932	0	6.20089	0.491346	low
TCGA-AK-3425	9.1589	0	4.1928	1.74555	high
TCGA-AK-3426	2.42466	1	3.64195	2.47149	high
TCGA-AK-3427	9.81644	0	3.42489	2.83444	high
TCGA-AK-3428	10.2137	0	5.53813	0.746609	low
TCGA-AK-3429	9.11781	0	4.75365	1.22509	high
TCGA-AK-3431	6.13973	1	5.35378	0.838753	low
TCGA-AK-3433	9.33973	0	5.57829	0.727916	low
TCGA-AK-3434	5.71781	0	5.33082	0.850997	low
TCGA-AK-3436	9.12603	0	3.99103	1.98268	high
TCGA-AK-3440	7.84932	0	5.3694	0.830526	low
TCGA-AK-3443	3.89863	0	5.72477	0.663623	low
TCGA-AK-3445	6.55342	0	4.47507	1.46064	high
TCGA-AK-3447	3.33425	0	2.78644	4.24138	high
TCGA-AK-3450	4.13151	0	5.17944	0.936336	low
TCGA-AK-3451	7.85753	0	3.94262	2.0442	high
TCGA-AK-3453	6.93425	0	3.78936	2.25187	high
TCGA-AK-3454	2.39452	0	4.12848	1.8179	high
TCGA-AK-3455	1.87123	1	4.39753	1.53392	high
TCGA-AK-3456	3.13151	0	6.1832	0.496865	low
TCGA-AK-3458	3.2	0	3.67188	2.42522	high
TCGA-AK-3460	6.87123	0	5.50083	0.764397	low
TCGA-AK-3461	6.07397	0	5.59106	0.722071	low
TCGA-AK-3465	1.01096	0	4.59916	1.35059	high
TCGA-AS-3777	3.39178	0	4.30575	1.62542	high
TCGA-AS-3778	0.117808	0	5.33831	0.846986	low
TCGA-B0-4688	0.276712	1	3.97351	2.00473	high
TCGA-B0-4690	0.117808	1	4.5768	1.36979	high
TCGA-B0-4691	0.380822	1	3.72261	2.34879	high
TCGA-B0-4693	0.210959	1	5.22622	0.909088	low
TCGA-B0-4694	0.290411	1	4.20163	1.73585	high
TCGA-B0-4696	2.3726	1	3.01193	3.67863	high
TCGA-B0-4697	1.58356	1	4.13133	1.81462	high
TCGA-B0-4698	0.115068	1	4.42837	1.50435	high
TCGA-B0-4699	0.30137	1	4.66482	1.29575	high
TCGA-B0-4700	5.42466	1	4.53687	1.40476	high
TCGA-B0-4701	0.652055	1	4.90699	1.11206	high
TCGA-B0-4703	0.49863	1	5.47218	0.778349	low
TCGA-B0-4706	0.178082	1	4.52679	1.41372	high
TCGA-B0-4707	1.64384	1	3.7713	2.27769	high
TCGA-B0-4710	4.80822	0	5.27457	0.881763	low
TCGA-B0-4712	3.66301	1	3.54063	2.63472	high
TCGA-B0-4713	0.553425	1	3.25124	3.16283	high
TCGA-B0-4714	0.271233	1	4.71112	1.25843	high
TCGA-B0-4718	4.87123	0	4.51577	1.42359	high
TCGA-B0-4810	1.30959	1	4.82952	1.1678	high
TCGA-B0-4811	3.88219	1	3.87718	2.13042	high
TCGA-B0-4813	0.0493151	1	2.67401	4.55335	high
TCGA-B0-4814	0.460274	1	5.6926	0.67724	low
TCGA-B0-4815	4.35068	1	4.1567	1.7858	high
TCGA-B0-4816	3.75616	1	4.90962	1.11022	high
TCGA-B0-4817	2.79178	1	3.71095	2.36613	high
TCGA-B0-4818	1.39726	1	5.30141	0.866946	low
TCGA-B0-4819	0.50137	1	4.11969	1.828	high
TCGA-B0-4821	3.36986	1	3.68184	2.41002	high
TCGA-B0-4822	3.04384	1	4.15312	1.78983	high
TCGA-B0-4823	1.24384	1	5.31868	0.857546	low
TCGA-B0-4824	4.53973	1	5.06851	1.00426	high
TCGA-B0-4827	2.42466	1	5.18657	0.932132	low
TCGA-B0-4828	0.841096	1	4.37508	1.55582	high
TCGA-B0-4833	6.53699	1	4.63885	1.31717	high
TCGA-B0-4834	5.72603	1	5.82555	0.622717	low
TCGA-B0-4836	3.39178	1	4.54782	1.39508	high
TCGA-B0-4837	3.77534	1	4.56712	1.37819	high
TCGA-B0-4838	2.28493	1	5.26028	0.889753	low
TCGA-B0-4839	4.49041	1	4.4004	1.53114	high
TCGA-B0-4841	0.558904	1	4.15119	1.79202	high
TCGA-B0-4842	4.72329	1	2.70342	4.46959	high
TCGA-B0-4843	0.876712	1	4.68463	1.27965	high
TCGA-B0-4844	0.857534	1	3.51114	2.68424	high
TCGA-B0-4845	5.4411	1	5.20023	0.924129	low
TCGA-B0-4846	3.28767	1	5.2163	0.914799	low
TCGA-B0-4847	2.1726	1	3.69059	2.39675	high
TCGA-B0-4848	2.41918	1	4.76541	1.21603	high
TCGA-B0-4849	0.189041	1	4.92016	1.10285	high
TCGA-B0-4852	3.07123	1	4.89403	1.1212	high
TCGA-B0-4945	5.87671	1	5.66919	0.687321	low
TCGA-B0-5075	1.74521	1	4.78852	1.19842	high
TCGA-B0-5077	3.60822	1	5.08862	0.991587	high
TCGA-B0-5080	0.936986	1	5.57153	0.731031	low
TCGA-B0-5081	0.991781	1	4.47757	1.45834	high
TCGA-B0-5083	2.86301	1	4.61316	1.33871	high
TCGA-B0-5084	0.608219	1	4.95123	1.08143	high
TCGA-B0-5085	2.10959	1	3.93015	2.06036	high
TCGA-B0-5088	1.54247	1	4.84791	1.15432	high
TCGA-B0-5092	1.25753	1	4.71037	1.25903	high
TCGA-B0-5094	0.912329	1	4.08343	1.87033	high
TCGA-B0-5095	0.671233	1	5.31626	0.858857	low
TCGA-B0-5096	0.186301	1	5.11748	0.973685	high
TCGA-B0-5097	1.82192	0	5.60263	0.716819	low
TCGA-B0-5098	4.33973	1	4.36279	1.56794	high
TCGA-B0-5099	1.32877	1	5.77425	0.643217	low
TCGA-B0-5100	5.2411	1	4.16448	1.77705	high
TCGA-B0-5102	7.5726	1	4.43409	1.49892	high
TCGA-B0-5106	4.37808	1	5.08321	0.994981	high
TCGA-B0-5107	2.53973	1	3.6148	2.51421	high
TCGA-B0-5108	4.88219	0	5.51041	0.759789	low
TCGA-B0-5109	1.60822	1	5.31752	0.858173	low
TCGA-B0-5110	5.50411	0	6.03991	0.543902	low
TCGA-B0-5113	3.21918	0	5.46838	0.780216	low
TCGA-B0-5115	4.39452	0	5.92239	0.585791	low
TCGA-B0-5116	3.49041	0	4.96572	1.07158	high
TCGA-B0-5117	4.40548	0	4.51667	1.42279	high
TCGA-B0-5119	4.25205	0	6.11212	0.519666	low
TCGA-B0-5120	3.20274	0	5.33928	0.846468	low
TCGA-B0-5121	4.06849	0	5.31519	0.859439	low
TCGA-B0-5399	3.86575	0	5.53008	0.750413	low
TCGA-B0-5400	4.74795	0	3.47313	2.74942	high
TCGA-B0-5402	3.53425	0	5.5588	0.736927	low
TCGA-B0-5690	9.29315	0	6.39882	0.433631	low
TCGA-B0-5691	9.4	0	6.03123	0.546893	low
TCGA-B0-5692	10.8055	0	4.71031	1.25907	high
TCGA-B0-5693	11.1616	0	5.97136	0.567956	low
TCGA-B0-5694	1.31507	1	5.15781	0.949213	high
TCGA-B0-5695	5.89041	0	5.65564	0.693227	low
TCGA-B0-5696	7.14795	0	4.85904	1.14624	high
TCGA-B0-5697	7.20548	0	5.32285	0.85529	low
TCGA-B0-5698	9.94795	0	5.48931	0.769976	low
TCGA-B0-5699	10.5233	0	5.47645	0.77625	low
TCGA-B0-5700	4.90411	0	5.111	0.977677	high
TCGA-B0-5701	6.74247	0	5.31832	0.857743	low
TCGA-B0-5702	5.95068	0	3.72932	2.33885	high
TCGA-B0-5703	6.15342	0	4.8404	1.15981	high
TCGA-B0-5705	12.4301	0	5.83759	0.618002	low
TCGA-B0-5706	8.78082	0	4.6045	1.34604	high
TCGA-B0-5707	10.2575	0	4.78396	1.20187	high
TCGA-B0-5709	10.8877	0	6.15042	0.507251	low
TCGA-B0-5710	6.65753	0	6.12225	0.516353	low
TCGA-B0-5711	10.9288	0	5.91355	0.589068	low
TCGA-B0-5712	7.45753	0	5.27888	0.879364	low
TCGA-B0-5713	7.62192	0	5.84109	0.616641	low
TCGA-B0-5812	10.5041	0	5.77576	0.642604	low
TCGA-B2-3923	2.71781	0	5.92854	0.583522	low
TCGA-B2-3924	2.99178	0	5.58642	0.724191	low
TCGA-B2-4098	0.139726	1	3.05957	3.56965	high
TCGA-B2-4099	2.66301	0	4.01878	1.94824	high
TCGA-B2-4101	1.77534	0	5.78621	0.638375	low
TCGA-B2-4102	2.60822	0	5.86988	0.605534	low
TCGA-B2-5633	2.63836	0	5.79575	0.634543	low
TCGA-B2-5635	2.06849	0	6.02532	0.548935	low
TCGA-B2-5636	2.51781	0	6.32014	0.455716	low
TCGA-B2-5639	2.74795	1	5.36356	0.833592	low
TCGA-B2-5641	1.79726	0	5.56551	0.733814	low
TCGA-B2-A4SR	1.38904	0	6.03947	0.544056	low
TCGA-B4-5377	1	0	5.33938	0.846415	low
TCGA-B4-5378	0.479452	0	5.5833	0.725618	low
TCGA-B4-5832	0.424658	0	4.12777	1.81871	high
TCGA-B4-5834	0.10411	0	6.17186	0.500433	low
TCGA-B4-5835	0.0438356	0	3.97031	2.00878	high
TCGA-B4-5836	0.386301	0	5.60726	0.714723	low
TCGA-B4-5838	0.454795	0	5.54809	0.741928	low
TCGA-B4-5843	0.030137	0	5.83713	0.618185	low
TCGA-B4-5844	0.0191781	0	6.18442	0.49648	low
TCGA-B8-4143	1.94247	1	4.66396	1.29645	high
TCGA-B8-4148	4.16438	0	5.64258	0.698964	low
TCGA-B8-4151	3.5589	0	4.45416	1.48006	high
TCGA-B8-4154	3.78082	0	4.23663	1.69792	high
TCGA-B8-4619	1.43288	0	5.80602	0.630445	low
TCGA-B8-4620	2.12877	0	4.47629	1.45952	high
TCGA-B8-4621	2.1589	0	5.55625	0.738114	low
TCGA-B8-4622	4.17808	0	4.89058	1.12364	high
TCGA-B8-5158	3.33699	0	5.01552	1.03842	high
TCGA-B8-5159	1.97808	0	6.50427	0.405705	low
TCGA-B8-5162	0.0986301	0	4.9635	1.07308	high
TCGA-B8-5163	2.25205	0	5.71679	0.666974	low
TCGA-B8-5164	0.0712329	0	5.39805	0.815639	low
TCGA-B8-5165	2.01918	0	6.02422	0.549317	low
TCGA-B8-5545	4.17808	0	5.6848	0.680582	low
TCGA-B8-5546	1.38356	0	5.7651	0.64694	low
TCGA-B8-5549	0.531507	0	5.52213	0.754186	low
TCGA-B8-5550	4.04384	0	6.23011	0.482364	low
TCGA-B8-5551	0.0438356	0	5.65424	0.69384	low
TCGA-B8-5553	1.19178	0	6.12914	0.514113	low
TCGA-B8-A54D	2.27397	0	4.66115	1.29876	high
TCGA-B8-A54E	2.49041	0	4.10523	1.84477	high
TCGA-B8-A54F	1.42192	0	4.88625	1.12671	high
TCGA-B8-A54G	0.145205	0	4.74502	1.23179	high
TCGA-B8-A54H	0.70137	0	5.66692	0.688308	low
TCGA-B8-A54I	0.410959	0	4.34917	1.58148	high
TCGA-B8-A54J	1.44658	0	5.85749	0.610289	low
TCGA-B8-A54K	1.28493	0	5.26066	0.889537	low
TCGA-B8-A7U6	1.35616	0	5.26064	0.889548	low
TCGA-B8-A8YJ	1.18082	0	6.02804	0.547995	low
TCGA-BP-4158	9.25205	0	4.92074	1.10245	high
TCGA-BP-4159	7.12603	1	4.52764	1.41297	high
TCGA-BP-4160	7.89315	0	4.64657	1.31077	high
TCGA-BP-4161	7.52329	0	5.33185	0.850447	low
TCGA-BP-4162	8.42192	0	5.9373	0.580302	low
TCGA-BP-4163	7.77808	0	5.27556	0.881208	low
TCGA-BP-4164	2.71781	1	4.60559	1.34512	high
TCGA-BP-4165	8.32055	0	5.00597	1.0447	high
TCGA-BP-4166	0.0356164	0	5.0661	1.00578	high
TCGA-BP-4167	7.44658	0	3.77017	2.27932	high
TCGA-BP-4169	1.92055	1	5.40069	0.814277	low
TCGA-BP-4170	6.41918	1	5.23271	0.905374	low
TCGA-BP-4173	5.1863	0	4.8115	1.18116	high
TCGA-BP-4174	5.14795	0	5.00533	1.04512	high
TCGA-BP-4176	5.35616	0	3.98743	1.98718	high
TCGA-BP-4177	4.57534	0	5.12525	0.968922	high
TCGA-BP-4325	8.12055	0	4.70132	1.26624	high
TCGA-BP-4326	4.45205	1	4.61139	1.3402	high
TCGA-BP-4327	0.29863	1	4.94572	1.0852	high
TCGA-BP-4329	2.31507	1	4.63212	1.32278	high
TCGA-BP-4330	5.1726	0	5.49893	0.765313	low
TCGA-BP-4331	6.72329	1	5.18576	0.932608	low
TCGA-BP-4332	3.10411	0	5.23138	0.906133	low
TCGA-BP-4334	1.76712	1	4.21278	1.72368	high
TCGA-BP-4335	1.30137	1	4.92202	1.10156	high
TCGA-BP-4337	0.00547945	1	4.96857	1.06966	high
TCGA-BP-4338	7.83288	0	4.67968	1.28366	high
TCGA-BP-4340	1.53973	1	5.96789	0.569204	low
TCGA-BP-4341	4.35342	1	5.13185	0.964892	high
TCGA-BP-4342	6.18082	1	4.88943	1.12446	high
TCGA-BP-4343	5.23836	1	3.54514	2.62724	high
TCGA-BP-4344	4.56438	0	5.4573	0.785694	low
TCGA-BP-4345	4.15342	0	5.13151	0.965103	high
TCGA-BP-4346	4.09041	1	4.99625	1.05113	high
TCGA-BP-4347	3.74521	0	5.79817	0.633577	low
TCGA-BP-4349	1.01918	0	5.38312	0.823361	low
TCGA-BP-4351	2.65753	0	5.08009	0.996942	high
TCGA-BP-4352	0.942466	1	4.18485	1.75434	high
TCGA-BP-4353	1.0274	1	5.29342	0.87133	low
TCGA-BP-4354	2.83288	1	4.9336	1.09354	high
TCGA-BP-4355	2.61096	1	5.66662	0.688439	low
TCGA-BP-4756	1.02466	0	6.81831	0.332745	low
TCGA-BP-4758	6.04932	0	4.86078	1.14498	high
TCGA-BP-4759	6.49863	0	4.92623	1.09863	high
TCGA-BP-4760	6.46849	0	5.63855	0.700747	low
TCGA-BP-4761	0.49863	0	3.63658	2.47988	high
TCGA-BP-4762	3.67945	1	5.0347	1.02592	high
TCGA-BP-4763	3.47945	1	5.10544	0.981113	high
TCGA-BP-4765	5.98356	0	5.54272	0.744449	low
TCGA-BP-4766	4.00548	0	5.60541	0.715562	low
TCGA-BP-4768	1.09589	0	5.09416	0.988127	high
TCGA-BP-4769	5.13973	0	5.26851	0.885139	low
TCGA-BP-4770	0.90137	1	3.99779	1.97423	high
TCGA-BP-4771	0.443836	1	5.0456	1.01889	high
TCGA-BP-4774	5.16438	0	5.46332	0.782711	low
TCGA-BP-4775	5.04932	0	5.7997	0.632964	low
TCGA-BP-4776	1.12603	0	4.79014	1.19719	high
TCGA-BP-4777	4.74247	0	4.62869	1.32565	high
TCGA-BP-4781	5.69863	0	4.9546	1.07913	high
TCGA-BP-4782	0.969863	0	5.7493	0.653425	low
TCGA-BP-4784	5.07945	0	4.97001	1.06868	high
TCGA-BP-4787	1.31507	1	4.4048	1.5269	high
TCGA-BP-4789	4.07945	0	6.0875	0.527805	low
TCGA-BP-4790	3.04384	1	5.45907	0.784816	low
TCGA-BP-4795	1.69863	0	6.07438	0.532194	low
TCGA-BP-4797	3.03288	0	5.51475	0.75771	low
TCGA-BP-4798	0.915068	1	4.56111	1.38342	high
TCGA-BP-4799	3.10411	1	4.15449	1.78828	high
TCGA-BP-4801	3.07945	0	6.02936	0.547539	low
TCGA-BP-4803	0.558904	0	5.16513	0.944834	low
TCGA-BP-4804	3.99726	0	4.74526	1.2316	high
TCGA-BP-4807	0.578082	0	5.09973	0.984661	high
TCGA-BP-4959	7.28767	0	5.04267	1.02077	high
TCGA-BP-4960	5.95068	0	3.98151	1.99462	high
TCGA-BP-4961	5.30137	0	6.23072	0.482179	low
TCGA-BP-4962	4.89041	0	4.58329	1.36419	high
TCGA-BP-4963	5.02466	0	5.2176	0.914048	low
TCGA-BP-4964	5.10137	0	5.12712	0.967781	high
TCGA-BP-4965	5.12603	0	5.91042	0.590233	low
TCGA-BP-4967	0.561644	0	4.72402	1.24822	high
TCGA-BP-4968	4.78356	0	4.5909	1.35765	high
TCGA-BP-4969	4.91507	0	5.30672	0.864048	low
TCGA-BP-4970	1.1863	0	5.93722	0.580329	low
TCGA-BP-4971	4.07397	0	4.63366	1.32149	high
TCGA-BP-4972	4.11507	0	5.72069	0.665335	low
TCGA-BP-4973	3.79178	0	5.58591	0.724422	low
TCGA-BP-4974	0.578082	1	6.03254	0.54644	low
TCGA-BP-4975	3.92603	0	5.60298	0.716657	low
TCGA-BP-4976	4.47123	0	5.68792	0.679241	low
TCGA-BP-4977	1.24384	0	4.45305	1.48109	high
TCGA-BP-4981	3.00548	1	4.09282	1.85928	high
TCGA-BP-4982	2.77808	0	6.08247	0.529486	low
TCGA-BP-4983	3.87123	0	5.91093	0.590044	low
TCGA-BP-4985	2.60822	1	4.98247	1.06032	high
TCGA-BP-4986	2.15068	0	5.25716	0.891505	low
TCGA-BP-4987	3.07945	0	5.76976	0.645042	low
TCGA-BP-4989	0.323288	0	4.62804	1.32619	high
TCGA-BP-4991	3.87123	0	6.01292	0.553248	low
TCGA-BP-4992	1.3726	0	3.24293	3.17946	high
TCGA-BP-4993	0.484932	0	5.95333	0.574461	low
TCGA-BP-4994	3.58356	0	5.49057	0.769361	low
TCGA-BP-4995	3.75616	0	5.57928	0.72746	low
TCGA-BP-4998	2.55342	0	5.31611	0.858938	low
TCGA-BP-4999	3.46849	0	6.06454	0.535512	low
TCGA-BP-5000	1.54247	0	4.45138	1.48265	high
TCGA-BP-5001	3.22466	0	4.38998	1.54125	high
TCGA-BP-5004	3.08493	0	5.51577	0.757223	low
TCGA-BP-5006	2.30137	0	5.338	0.84715	low
TCGA-BP-5007	3.12329	0	5.44825	0.790196	low
TCGA-BP-5008	2.93425	0	5.55726	0.737644	low
TCGA-BP-5009	2.99178	1	4.26349	1.66937	high
TCGA-BP-5010	2.40548	1	4.31146	1.61958	high
TCGA-BP-5168	4.00822	1	5.24216	0.899989	low
TCGA-BP-5169	0.528767	0	3.67666	2.41792	high
TCGA-BP-5170	6.60822	0	4.8403	1.15988	high
TCGA-BP-5173	0.169863	1	5.32298	0.855223	low
TCGA-BP-5174	6.18356	0	5.39612	0.816633	low
TCGA-BP-5175	2.55342	0	3.18398	3.30002	high
TCGA-BP-5176	4.35616	1	5.54196	0.744805	low
TCGA-BP-5177	0.80274	0	5.62939	0.70481	low
TCGA-BP-5178	5.23836	1	4.06838	1.88819	high
TCGA-BP-5180	6.2	0	4.46899	1.46627	high
TCGA-BP-5181	4.09589	0	5.5635	0.734743	low
TCGA-BP-5182	3.19178	0	5.24754	0.896939	low
TCGA-BP-5183	3.53699	0	5.25124	0.894842	low
TCGA-BP-5184	3.10411	0	5.8891	0.598231	low
TCGA-BP-5185	3.10137	0	3.52415	2.66229	high
TCGA-BP-5186	1.89863	0	6.03036	0.547193	low
TCGA-BP-5187	1.11233	0	5.56671	0.733259	low
TCGA-BP-5189	2.25205	1	5.64407	0.698309	low
TCGA-BP-5190	2.76986	0	5.07551	0.999833	high
TCGA-BP-5191	2.64932	0	3.70133	2.38055	high
TCGA-BP-5192	1.95616	0	5.74676	0.654477	low
TCGA-BP-5194	1.11781	0	5.89966	0.594256	low
TCGA-BP-5195	2.05205	0	5.35746	0.836806	low
TCGA-BP-5196	2.78904	0	4.77384	1.20958	high
TCGA-BP-5198	1.65205	0	4.87933	1.13165	high
TCGA-BP-5199	3.71233	0	5.12551	0.968764	high
TCGA-BP-5200	2.91233	0	5.82879	0.621446	low
TCGA-BP-5201	2.60548	0	4.94869	1.08317	high
TCGA-BP-5202	0.0794521	0	5.78153	0.640264	low
TCGA-CJ-4634	9.58356	0	6.06677	0.534757	low
TCGA-CJ-4635	3.87945	0	4.86695	1.14053	high
TCGA-CJ-4636	5.27123	0	4.7354	1.23929	high
TCGA-CJ-4637	6.10137	1	4.77753	1.20676	high
TCGA-CJ-4638	1.18082	1	4.01907	1.9479	high
TCGA-CJ-4639	8.84658	0	5.67578	0.68447	low
TCGA-CJ-4640	9.53425	0	5.06615	1.00576	high
TCGA-CJ-4641	4.55068	1	5.17423	0.939422	low
TCGA-CJ-4643	4.91233	0	5.8459	0.614772	low
TCGA-CJ-4644	0.920548	1	5.02154	1.03448	high
TCGA-CJ-4868	1.76986	1	5.15346	0.951819	high
TCGA-CJ-4869	6.99726	0	4.69303	1.27288	high
TCGA-CJ-4870	4.10411	0	5.52609	0.752305	low
TCGA-CJ-4871	6.63836	0	5.12284	0.970399	high
TCGA-CJ-4872	3.93151	0	5.33802	0.847137	low
TCGA-CJ-4873	4.86575	0	3.44785	2.79366	high
TCGA-CJ-4874	6.25479	0	5.0871	0.992542	high
TCGA-CJ-4875	9.73699	1	4.1665	1.77478	high
TCGA-CJ-4876	5.35616	0	5.30196	0.866648	low
TCGA-CJ-4878	5.98904	0	5.16611	0.94425	low
TCGA-CJ-4881	5.51781	0	4.33286	1.59784	high
TCGA-CJ-4882	5.1589	0	4.98729	1.05709	high
TCGA-CJ-4884	4.81918	0	5.13051	0.965709	high
TCGA-CJ-4885	9.45479	0	4.58522	1.36253	high
TCGA-CJ-4886	5.34795	0	5.7051	0.671917	low
TCGA-CJ-4887	2.55342	1	4.53485	1.40655	high
TCGA-CJ-4888	4.29315	1	4.57046	1.37528	high
TCGA-CJ-4889	5.33151	0	5.55427	0.73904	low
TCGA-CJ-4890	9.6411	0	4.62224	1.33105	high
TCGA-CJ-4891	2.24384	1	3.58497	2.562	high
TCGA-CJ-4892	4.16712	0	4.83444	1.16418	high
TCGA-CJ-4893	2.05479	0	5.73447	0.659572	low
TCGA-CJ-4894	2.30411	1	5.43991	0.794364	low
TCGA-CJ-4895	3.28767	1	4.39829	1.53319	high
TCGA-CJ-4897	9.15342	0	5.80438	0.631097	low
TCGA-CJ-4899	4.1863	0	6.0697	0.533769	low
TCGA-CJ-4900	4.69589	1	4.63931	1.31679	high
TCGA-CJ-4901	3.9726	0	4.70072	1.26672	high
TCGA-CJ-4902	4.16438	0	5.26311	0.888163	low
TCGA-CJ-4903	4.27397	0	5.29771	0.868972	low
TCGA-CJ-4904	9.04658	0	5.83514	0.618961	low
TCGA-CJ-4905	4.09863	0	6.36649	0.442573	low
TCGA-CJ-4907	4.10685	0	5.97976	0.564953	low
TCGA-CJ-4908	4.19452	0	5.95266	0.574701	low
TCGA-CJ-4912	4.53973	0	3.82923	2.1959	high
TCGA-CJ-4916	3.76164	0	4.90589	1.11283	high
TCGA-CJ-4918	0.254795	1	5.4127	0.808127	low
TCGA-CJ-4920	0.380822	1	5.72096	0.665223	low
TCGA-CJ-5671	10.9233	0	5.19713	0.92594	low
TCGA-CJ-5672	5.40274	1	5.38117	0.824376	low
TCGA-CJ-5675	10.7836	0	5.1596	0.948138	high
TCGA-CJ-5676	11.1425	0	4.8442	1.15702	high
TCGA-CJ-5677	2.14247	1	4.72001	1.25139	high
TCGA-CJ-5678	1.5726	1	4.04562	1.91551	high
TCGA-CJ-5679	1.86027	1	4.06148	1.89643	high
TCGA-CJ-5680	2.10411	1	5.84637	0.614587	low
TCGA-CJ-5681	1.51233	1	5.97433	0.566895	low
TCGA-CJ-5682	10.2356	0	5.24087	0.900724	low
TCGA-CJ-5683	5.17534	0	5.38459	0.822596	low
TCGA-CJ-5684	6.11233	0	5.563	0.734978	low
TCGA-CJ-5686	5.58356	0	5.41336	0.807791	low
TCGA-CJ-6027	9.90411	1	4.03685	1.92615	high
TCGA-CJ-6028	4.45205	1	4.87641	1.13374	high
TCGA-CJ-6030	6.29863	1	4.94716	1.08421	high
TCGA-CJ-6031	5.22192	0	4.76266	1.21815	high
TCGA-CJ-6032	9.96986	0	6.15724	0.505072	low
TCGA-CJ-6033	0.613699	1	4.49862	1.4391	high
TCGA-CW-5580	5.38082	1	5.84094	0.616697	low
TCGA-CW-5581	7.66849	0	6.02858	0.547806	low
TCGA-CW-5583	6.81918	0	6.18315	0.496878	low
TCGA-CW-5584	0.449315	1	5.96171	0.571427	low
TCGA-CW-5585	7.14795	0	6.20677	0.489525	low
TCGA-CW-5587	6.09863	0	6.17472	0.499532	low
TCGA-CW-5588	5.52603	0	5.05656	1.01186	high
TCGA-CW-5589	6.51507	0	5.99432	0.559786	low
TCGA-CW-5590	2.94521	1	5.52848	0.75117	low
TCGA-CW-5591	6.22192	0	6.24005	0.479347	low
TCGA-CW-6087	0.112329	1	4.88829	1.12526	high
TCGA-CW-6088	8.8274	0	6.72218	0.353564	low
TCGA-CW-6090	6.99178	0	4.4923	1.44485	high
TCGA-CW-6093	8.61918	0	6.10902	0.520684	low
TCGA-CW-6097	1.56438	1	5.75218	0.65224	low
TCGA-CZ-4853	2.12055	0	5.39611	0.816638	low
TCGA-CZ-4854	3.84658	1	4.7033	1.26466	high
TCGA-CZ-4856	0.0493151	0	5.55556	0.738435	low
TCGA-CZ-4857	3.92329	1	4.47709	1.45879	high
TCGA-CZ-4858	5.76712	1	4.29471	1.63679	high
TCGA-CZ-4859	4.89589	0	5.87619	0.603125	low
TCGA-CZ-4860	0.564384	1	5.22276	0.911075	low
TCGA-CZ-4861	1.22192	1	4.69751	1.26929	high
TCGA-CZ-4862	8.96164	0	5.52962	0.750629	low
TCGA-CZ-4863	5.28219	0	5.47581	0.776566	low
TCGA-CZ-4864	3.60274	1	5.3645	0.833094	low
TCGA-CZ-4865	0.454795	1	5.1595	0.948199	high
TCGA-CZ-4866	8.95068	0	5.4315	0.798595	low
TCGA-CZ-5451	5.28493	0	5.75195	0.652335	low
TCGA-CZ-5452	4.90137	0	4.80234	1.18801	high
TCGA-CZ-5453	6.6274	1	5.1283	0.967058	high
TCGA-CZ-5454	1.97808	1	4.61045	1.341	high
TCGA-CZ-5455	1.53699	1	5.53972	0.745856	low
TCGA-CZ-5456	6.63562	0	3.97554	2.00216	high
TCGA-CZ-5457	7.54521	0	5.5401	0.745678	low
TCGA-CZ-5458	7.6411	0	5.38412	0.822842	low
TCGA-CZ-5459	4.61096	0	4.74838	1.22917	high
TCGA-CZ-5460	7.87123	0	4.95832	1.0766	high
TCGA-CZ-5461	0.90411	1	5.17209	0.94069	low
TCGA-CZ-5462	0.852055	1	4.60248	1.34776	high
TCGA-CZ-5463	1.8137	0	5.10761	0.97977	high
TCGA-CZ-5464	5.83014	0	4.50542	1.43293	high
TCGA-CZ-5465	7.02466	1	5.33662	0.847887	low
TCGA-CZ-5466	1.87671	0	4.70342	1.26456	high
TCGA-CZ-5467	0.2	1	5.10012	0.984414	high
TCGA-CZ-5468	0.161644	1	4.17076	1.77001	high
TCGA-CZ-5469	2.59178	1	4.21975	1.71611	high
TCGA-CZ-5470	1.05753	0	4.98406	1.05925	high
TCGA-CZ-5982	6.68219	0	5.9213	0.586193	low
TCGA-CZ-5984	5.66301	0	4.96385	1.07285	high
TCGA-CZ-5985	5.47123	0	5.52498	0.752829	low
TCGA-CZ-5986	1.02192	0	5.92425	0.585103	low
TCGA-CZ-5987	1.21918	1	4.38178	1.54925	high
TCGA-CZ-5988	1.89863	0	5.69748	0.675155	low
TCGA-CZ-5989	5.21918	0	5.06675	1.00538	high
TCGA-DV-5565	3.6411	0	5.51463	0.757767	low
TCGA-DV-5566	3.83014	0	5.18936	0.93049	low
TCGA-DV-5567	5.49041	0	5.74841	0.653795	low
TCGA-DV-5568	1.0137	0	4.90629	1.11255	high
TCGA-DV-5569	0.972603	0	5.55248	0.739875	low
TCGA-DV-5573	3.09589	0	5.291	0.872663	low
TCGA-DV-5574	5.52329	0	5.66738	0.688106	low
TCGA-DV-5575	4.73699	0	5.83008	0.620941	low
TCGA-DV-5576	1.99178	1	5.60939	0.713765	low
TCGA-DV-A4VX	4.45479	1	3.81472	2.21611	high
TCGA-DV-A4VZ	1	0	3.61991	2.50611	high
TCGA-DV-A4W0	6.76712	0	5.87265	0.604475	low
TCGA-EU-5904	1.50959	0	6.13776	0.511322	low
TCGA-EU-5905	0.326027	0	5.39847	0.815419	low
TCGA-EU-5906	0.564384	0	6.04174	0.543276	low
TCGA-EU-5907	0.347945	0	4.71297	1.25696	high
TCGA-G6-A5PC	0.663014	1	3.89307	2.10916	high
TCGA-G6-A8L6	0.857534	1	4.77734	1.20691	high
TCGA-G6-A8L7	5.84384	0	2.30742	5.73901	high
TCGA-G6-A8L8	2.98904	1	4.54686	1.39593	high
TCGA-GK-A6C7	0.167123	0	5.90115	0.593698	low
TCGA-MM-A563	1.61918	0	5.13726	0.961603	high
TCGA-MM-A564	1.66301	0	4.45093	1.48308	high
TCGA-MM-A84U	1.91781	0	4.93649	1.09154	high
TCGA-MW-A4EC	1.36438	0	4.73608	1.23875	high
TCGA-T7-A92I	0.975342	0	6.28813	0.465016	low
Note: In "fustat" column, 0 and 1 represent alive and dead, respectively.
