# Supplementary material for: Clinical significance of nonerythrocytic spectrin Beta 1 (SPTBN1) in human kidney renal clear cell carcinoma and uveal melanoma: a study based on Pan-Cancer Analysis
Source: BMC Cancer. 2023 Apr 3;23:303. doi: 10.1186/s12885-023-10789-3 (PMC10071745; doi:10.1186/s12885-023-10789-3)
Supplement: Supplementary file 7 — Supplementary Material 7 [file 12885_2023_10789_MOESM7_ESM.xlsx]

## Sheet: Sheet1
revised_Suppmentary File 7 Detailed information about IPS of TCGA-KIRC patients receiving ICI therapy.
barcode	ips_ctla4_neg_pd1_neg	ips_ctla4_neg_pd1_pos	ips_ctla4_pos_pd1_neg	ips_ctla4_pos_pd1_pos
TCGA-B0-4688	6	7	6	6
TCGA-BP-4983	6	8	6	8
TCGA-BP-4807	7	6	6	5
TCGA-A3-3313	7	6	6	6
TCGA-CZ-4861	7	7	7	7
TCGA-EU-5907	7	7	7	6
TCGA-BP-4972	7	7	7	6
TCGA-B0-5097	7	7	7	7
TCGA-B8-5551	7	8	7	8
TCGA-CW-5580	7	6	7	6
TCGA-B0-5108	7	7	6	7
TCGA-A3-3374	7	7	7	7
TCGA-CW-5591	7	6	7	5
TCGA-CZ-5454	7	7	7	6
TCGA-BP-4354	7	7	6	6
TCGA-BP-4770	7	6	7	6
TCGA-B4-5838	7	7	7	6
TCGA-BP-4326	7	6	7	6
TCGA-A3-3378	7	8	7	8
TCGA-BP-4760	7	6	7	6
TCGA-CW-6090	7	7	7	6
TCGA-B2-4098	7	7	7	7
TCGA-AK-3456	7	7	7	6
TCGA-B0-4698	7	8	7	8
TCGA-B0-4690	7	7	7	7
TCGA-B0-5109	7	7	7	7
TCGA-B8-4620	7	6	7	6
TCGA-CW-6087	7	9	7	9
TCGA-B0-4699	7	8	7	8
TCGA-B0-5812	8	7	7	6
TCGA-BP-5170	8	7	8	6
TCGA-A3-3347	8	7	7	7
TCGA-BP-4340	8	7	8	7
TCGA-AK-3431	8	7	8	6
TCGA-A3-3322	8	7	7	6
TCGA-BP-4795	8	7	7	6
TCGA-CZ-5461	8	7	8	7
TCGA-CJ-4907	8	7	8	6
TCGA-BP-4331	8	7	8	7
TCGA-A3-3308	8	7	7	7
TCGA-B0-4810	8	8	8	8
TCGA-BP-4169	8	7	8	7
TCGA-B0-4712	8	8	8	7
TCGA-CW-6093	8	7	7	6
TCGA-CW-6088	8	7	8	7
TCGA-B0-4710	8	6	7	6
TCGA-B0-5113	8	8	8	8
TCGA-B0-4816	8	7	8	7
TCGA-CJ-6027	8	8	8	8
TCGA-EU-5905	8	7	8	6
TCGA-BP-4173	8	9	9	9
TCGA-B0-5075	8	8	8	7
TCGA-A3-3376	8	7	8	7
TCGA-CJ-4890	8	9	8	8
TCGA-BP-4338	8	7	7	6
TCGA-A3-3385	8	7	7	6
TCGA-CZ-5985	8	8	8	7
TCGA-BP-4967	8	7	8	6
TCGA-AK-3425	8	8	8	7
TCGA-G6-A8L7	8	7	8	7
TCGA-B0-5694	8	6	7	6
TCGA-A3-3372	8	8	8	7
TCGA-B0-4694	8	8	8	7
TCGA-B0-4696	8	6	7	5
TCGA-A3-3316	8	7	7	6
TCGA-A3-3319	8	7	8	6
TCGA-A3-3352	8	7	8	7
TCGA-CJ-4868	8	8	8	8
TCGA-BP-4976	8	7	7	6
TCGA-BP-5189	8	7	8	7
TCGA-CZ-5989	8	8	8	7
TCGA-CJ-4918	8	7	7	7
TCGA-BP-4761	8	7	8	7
TCGA-CJ-6028	8	8	8	8
TCGA-BP-4337	8	7	7	6
TCGA-CZ-4866	8	7	8	7
TCGA-CJ-5681	8	6	7	6
TCGA-A3-A6NI	8	7	8	7
TCGA-A3-3373	8	7	8	7
TCGA-EU-5904	8	7	7	7
TCGA-CZ-4854	8	7	8	7
TCGA-BP-4162	8	9	8	9
TCGA-BP-5182	8	8	8	7
TCGA-B0-5691	8	7	7	6
TCGA-BP-4352	8	7	7	6
TCGA-CW-5585	8	6	7	5
TCGA-B8-A8YJ	8	8	8	7
TCGA-A3-A6NN	8	8	8	7
TCGA-CJ-5686	8	8	8	7
TCGA-AK-3450	8	7	8	6
TCGA-CW-5584	8	7	8	6
TCGA-A3-3380	8	7	8	7
TCGA-BP-5198	8	7	7	6
TCGA-CJ-4644	8	8	7	7
TCGA-CJ-4899	8	8	8	7
TCGA-CJ-4634	8	7	7	6
TCGA-CZ-4860	8	7	7	6
TCGA-B0-5690	8	7	8	6
TCGA-CJ-4642	8	7	8	6
TCGA-AS-3778	8	7	7	6
TCGA-DV-5568	8	8	8	7
TCGA-DV-5576	8	6	8	6
TCGA-CZ-5986	8	7	7	7
TCGA-B0-5711	8	8	8	7
TCGA-B0-4827	8	8	8	7
TCGA-CJ-5671	8	7	7	7
TCGA-A3-3349	8	7	8	6
TCGA-B0-4848	8	7	8	7
TCGA-BP-4801	8	7	7	7
TCGA-CJ-4912	8	7	7	6
TCGA-A3-3325	8	7	8	7
TCGA-B8-5549	8	8	8	8
TCGA-B4-5843	8	7	7	6
TCGA-B4-5844	8	7	7	6
TCGA-BP-4327	8	6	7	6
TCGA-DV-5567	8	6	7	5
TCGA-B0-5120	8	7	8	7
TCGA-BP-4988	8	8	9	8
TCGA-B0-5102	8	7	7	6
TCGA-CJ-4643	8	8	8	7
TCGA-BP-5200	8	8	8	8
TCGA-CZ-5988	8	7	8	7
TCGA-A3-3335	8	7	8	7
TCGA-BP-4342	8	7	8	7
TCGA-BP-4963	8	7	8	7
TCGA-BP-4975	8	6	7	6
TCGA-CJ-4888	8	9	8	9
TCGA-B0-5110	8	8	8	7
TCGA-BP-4775	8	7	7	7
TCGA-BP-4985	8	8	8	7
TCGA-BP-4161	8	8	8	8
TCGA-B0-5693	8	7	8	6
TCGA-AK-3426	8	8	8	8
TCGA-CZ-4859	8	7	8	6
TCGA-DV-5565	8	7	8	7
TCGA-B0-4701	8	8	8	8
TCGA-CJ-6030	8	7	8	7
TCGA-T7-A92I	8	8	8	7
TCGA-BP-4765	8	7	8	6
TCGA-B0-4693	8	8	8	7
TCGA-B8-4143	8	9	9	9
TCGA-BP-4353	8	8	8	7
TCGA-A3-3382	8	7	7	7
TCGA-CW-5583	8	7	7	6
TCGA-B0-5695	8	7	8	7
TCGA-B2-A4SR	8	8	8	7
TCGA-AK-3453	8	7	7	6
TCGA-MM-A563	8	8	8	8
TCGA-CJ-4920	8	7	7	6
TCGA-CW-5587	8	8	8	8
TCGA-B0-5702	8	6	7	6
TCGA-B0-5083	8	7	8	7
TCGA-B0-4852	8	7	8	7
TCGA-B4-5832	8	7	8	7
TCGA-CJ-4637	8	9	9	9
TCGA-CJ-4870	8	7	8	7
TCGA-BP-4343	8	8	8	7
TCGA-BP-4766	8	6	7	6
TCGA-CW-5588	8	7	7	6
TCGA-CJ-4878	8	7	8	7
TCGA-B2-5633	8	7	8	7
TCGA-B0-4813	8	7	8	6
TCGA-BP-4991	8	7	8	7
TCGA-BP-4345	8	8	7	7
TCGA-A3-3346	8	7	7	7
TCGA-B8-5165	8	8	8	7
TCGA-A3-3358	8	8	8	7
TCGA-B0-5094	8	7	8	6
TCGA-B8-A54I	8	8	8	7
TCGA-CJ-6033	8	7	8	6
TCGA-A3-3324	8	8	7	7
TCGA-CJ-4884	8	8	8	7
TCGA-BP-4959	8	7	8	7
TCGA-BP-4787	8	7	7	6
TCGA-BP-4341	8	7	8	6
TCGA-BP-4781	8	7	7	6
TCGA-A3-3320	8	7	7	6
TCGA-BP-4344	8	7	8	7
TCGA-BP-4768	8	7	7	6
TCGA-B0-4821	8	7	8	7
TCGA-B0-4819	8	8	9	9
TCGA-A3-A6NL	8	7	8	7
TCGA-B8-A54F	8	6	7	6
TCGA-B4-5378	8	7	8	6
TCGA-BP-5009	8	7	8	7
TCGA-CZ-5453	8	7	8	7
TCGA-B0-4836	8	7	8	7
TCGA-CW-5589	8	7	7	6
TCGA-B8-5550	8	7	7	7
TCGA-B8-A54E	8	7	8	7
TCGA-BP-4998	8	8	8	7
TCGA-BP-5194	8	7	8	7
TCGA-CJ-5680	8	7	7	6
TCGA-CZ-5465	8	7	7	6
TCGA-CW-6097	8	8	8	8
TCGA-B0-5095	8	7	8	7
TCGA-A3-3363	8	7	8	6
TCGA-B8-4621	8	7	8	7
TCGA-EU-5906	8	7	7	6
TCGA-CJ-4903	8	8	8	7
TCGA-A3-3367	8	7	8	7
TCGA-B8-5158	8	7	7	6
TCGA-BP-4167	8	8	8	8
TCGA-BP-4163	8	7	7	6
TCGA-CJ-5689	8	7	8	7
TCGA-CZ-5467	8	7	8	6
TCGA-B0-5096	8	7	7	6
TCGA-B0-4845	8	7	8	7
TCGA-BP-4332	8	6	7	6
TCGA-B0-5084	8	7	8	6
TCGA-CJ-4635	8	8	8	8
TCGA-CJ-4895	8	7	8	7
TCGA-AK-3428	8	7	7	6
TCGA-A3-3387	8	7	8	7
TCGA-B0-5698	8	8	8	7
TCGA-CJ-4904	8	8	8	7
TCGA-B2-5636	8	7	7	6
TCGA-A3-3362	8	7	8	7
TCGA-BP-4164	8	7	8	7
TCGA-6D-AA2E	8	8	7	8
TCGA-BP-4756	8	7	7	7
TCGA-B8-5163	8	9	8	8
TCGA-BP-4355	8	6	7	6
TCGA-DV-A4VX	8	7	8	7
TCGA-B2-4102	8	7	8	7
TCGA-B0-4700	8	8	8	8
TCGA-B0-5099	8	7	7	6
TCGA-CZ-4857	8	7	7	7
TCGA-A3-3306	8	7	8	7
TCGA-CJ-4902	8	8	8	7
TCGA-CZ-4858	8	8	8	8
TCGA-CJ-4901	8	9	8	8
TCGA-CJ-6032	8	8	8	7
TCGA-CJ-4893	8	8	8	8
TCGA-A3-3359	8	8	8	8
TCGA-A3-3323	8	8	8	7
TCGA-B8-5552	8	7	7	7
TCGA-B8-4622	8	7	8	7
TCGA-B0-5402	8	7	7	7
TCGA-B8-4146	8	7	8	7
TCGA-BP-4986	8	7	8	7
TCGA-B8-5545	8	7	7	7
TCGA-B8-A54K	8	6	7	6
TCGA-BP-4973	8	8	8	8
TCGA-CZ-5982	8	7	8	7
TCGA-B0-4822	8	6	7	6
TCGA-A3-3331	8	7	7	7
TCGA-B0-5119	8	8	8	7
TCGA-BP-4176	8	7	8	7
TCGA-BP-4790	8	8	8	8
TCGA-B0-4837	9	7	8	7
TCGA-B8-A54H	9	8	8	7
TCGA-CZ-4865	9	8	9	8
TCGA-CJ-4900	9	8	9	8
TCGA-BP-4803	9	7	8	6
TCGA-BP-4969	9	7	8	7
TCGA-B0-5706	9	9	9	9
TCGA-BP-4166	9	8	8	7
TCGA-AK-3440	9	8	8	7
TCGA-BP-5004	9	8	8	7
TCGA-CJ-4639	9	9	8	8
TCGA-CJ-4882	9	8	9	8
TCGA-CJ-5679	9	7	8	6
TCGA-B0-4839	9	7	8	7
TCGA-B0-4814	9	8	8	7
TCGA-B2-3924	9	10	9	10
TCGA-CJ-4916	9	9	9	9
TCGA-CZ-5456	9	8	8	7
TCGA-B0-5115	9	8	8	7
TCGA-A3-3383	9	8	9	8
TCGA-B0-5081	9	9	9	9
TCGA-CJ-5682	9	8	8	7
TCGA-BP-5196	9	9	9	8
TCGA-BP-4960	9	7	8	7
TCGA-GK-A6C7	9	8	8	7
TCGA-B2-4099	9	8	9	8
TCGA-B0-4842	9	8	8	7
TCGA-B4-5835	9	8	9	7
TCGA-DV-5575	9	8	9	8
TCGA-BP-4158	9	8	9	7
TCGA-B0-5696	9	8	8	7
TCGA-BP-4968	9	8	9	8
TCGA-B0-4828	9	8	9	7
TCGA-A3-3329	9	8	8	8
TCGA-AK-3444	9	8	8	8
TCGA-CJ-4881	9	7	8	7
TCGA-CJ-4923	9	8	8	8
TCGA-B0-4706	9	8	8	7
TCGA-A3-A8OV	9	8	9	7
TCGA-G6-A8L6	9	8	8	7
TCGA-AK-3454	9	8	8	7
TCGA-BP-5000	9	8	9	8
TCGA-3Z-A93Z	9	8	9	7
TCGA-CW-5581	9	8	8	7
TCGA-BP-5169	9	8	9	8
TCGA-CJ-4636	9	8	8	8
TCGA-BP-4762	9	8	8	7
TCGA-A3-3326	9	9	9	8
TCGA-BP-5186	9	8	8	8
TCGA-B0-5088	9	8	8	7
TCGA-BP-5174	9	8	9	7
TCGA-CJ-5676	9	8	8	7
TCGA-BP-4771	9	10	9	10
TCGA-BP-5184	9	8	8	7
TCGA-BP-4759	9	8	8	7
TCGA-B0-4824	9	9	9	9
TCGA-B0-4843	9	7	8	7
TCGA-CJ-4908	9	8	8	8
TCGA-B2-3923	9	7	8	7
TCGA-AK-3461	9	8	8	8
TCGA-B8-A54J	9	8	9	8
TCGA-BP-4170	9	9	8	8
TCGA-BP-4160	9	9	9	9
TCGA-CZ-5463	9	8	8	8
TCGA-A3-3317	9	8	8	7
TCGA-BP-5177	9	8	9	7
TCGA-B0-5701	9	8	8	7
TCGA-A3-3365	9	8	9	7
TCGA-B0-4823	9	8	8	7
TCGA-CZ-5464	9	8	8	8
TCGA-A3-3307	9	8	8	8
TCGA-BP-5006	9	8	8	7
TCGA-BP-4995	9	8	8	7
TCGA-CZ-4853	9	8	8	7
TCGA-B0-5707	9	7	8	7
TCGA-AK-3465	9	7	8	7
TCGA-CZ-5468	9	9	9	8
TCGA-B8-4148	9	10	9	10
TCGA-CZ-4863	9	9	9	9
TCGA-A3-3311	9	8	8	8
TCGA-B2-5641	9	9	9	9
TCGA-CZ-5460	9	8	8	8
TCGA-B0-4697	9	9	9	10
TCGA-A3-A6NJ	9	9	9	9
TCGA-BP-4789	9	7	8	7
TCGA-BP-4351	9	7	8	7
TCGA-B0-4714	9	9	9	9
TCGA-CZ-5470	9	9	9	8
TCGA-BP-4347	9	8	9	8
TCGA-MM-A84U	9	8	8	7
TCGA-BP-4782	9	8	9	8
TCGA-BP-4999	9	8	8	7
TCGA-B8-5159	9	8	8	8
TCGA-B0-4834	9	8	8	7
TCGA-BP-5180	9	7	8	7
TCGA-CZ-5451	9	8	9	8
TCGA-B0-5100	9	7	8	6
TCGA-B0-4945	9	8	9	8
TCGA-BP-5187	9	8	9	8
TCGA-B8-A7U6	9	7	8	7
TCGA-CJ-6031	9	8	8	7
TCGA-BP-4970	9	9	8	8
TCGA-CJ-4886	9	8	8	8
TCGA-BP-4177	9	7	8	6
TCGA-CJ-4897	9	8	8	7
TCGA-B0-4846	9	9	9	9
TCGA-A3-A8OU	9	7	8	7
TCGA-A3-A8OX	9	8	8	8
TCGA-CZ-5458	9	8	8	8
TCGA-BP-4964	9	8	8	7
TCGA-CZ-5987	9	8	9	8
TCGA-B0-5080	9	8	8	7
TCGA-CJ-4871	9	8	8	7
TCGA-BP-4989	9	9	9	9
TCGA-BP-4769	9	7	8	6
TCGA-BP-4797	9	8	8	7
TCGA-G6-A8L8	9	7	8	7
TCGA-CZ-5459	9	8	9	8
TCGA-B0-5107	9	9	9	9
TCGA-BP-4349	9	7	8	7
TCGA-BP-4159	9	7	8	7
TCGA-BP-4329	9	8	8	7
TCGA-BP-5178	9	8	9	8
TCGA-CJ-4889	9	9	9	8
TCGA-B0-5697	9	9	9	8
TCGA-CZ-5462	9	8	9	8
TCGA-BP-4763	9	8	8	7
TCGA-BP-4777	9	9	9	9
TCGA-BP-4982	9	8	8	7
TCGA-B0-5104	9	8	8	7
TCGA-BP-4971	9	8	9	8
TCGA-DV-5569	9	8	8	8
TCGA-AK-3433	9	7	8	7
TCGA-BP-4330	9	9	9	9
TCGA-B2-5639	9	8	9	8
TCGA-CJ-5683	9	8	9	7
TCGA-CZ-5455	9	9	9	9
TCGA-B0-4718	9	8	9	8
TCGA-B8-5164	9	10	9	9
TCGA-B0-4841	9	7	8	7
TCGA-BP-5168	9	8	8	7
TCGA-B8-4619	9	8	8	7
TCGA-B8-5546	9	7	8	6
TCGA-B0-4707	9	8	8	7
TCGA-B0-5700	9	8	9	7
TCGA-CZ-4864	9	10	9	9
TCGA-B0-4844	9	8	9	8
TCGA-B8-4154	9	8	9	8
TCGA-CJ-4874	9	9	9	8
TCGA-CJ-4875	9	8	8	8
TCGA-CJ-4872	9	8	9	8
TCGA-A3-3328	9	8	8	7
TCGA-B8-5553	9	8	8	8
TCGA-BP-4994	9	8	8	7
TCGA-BP-4174	9	8	8	8
TCGA-CJ-4905	9	7	8	7
TCGA-CJ-4892	9	9	9	8
TCGA-CJ-4885	9	7	8	7
TCGA-BP-5181	9	8	8	7
TCGA-CJ-4873	9	8	9	8
TCGA-CZ-5466	9	8	8	8
TCGA-B0-4811	9	7	9	7
TCGA-B0-5703	9	8	9	7
TCGA-BP-4346	9	10	9	10
TCGA-B2-5635	9	9	9	8
TCGA-B4-5836	9	8	8	7
TCGA-AK-3460	9	8	8	7
TCGA-BP-5192	9	7	8	7
TCGA-B0-4818	9	9	9	8
TCGA-CZ-5469	9	7	8	7
TCGA-MM-A564	9	7	8	7
TCGA-B0-5085	9	8	9	7
TCGA-B0-5400	9	8	9	8
TCGA-BP-4784	9	7	8	6
TCGA-B0-5106	9	8	8	7
TCGA-B0-5116	9	7	8	6
TCGA-BP-5202	9	8	8	7
TCGA-B2-4101	9	8	8	8
TCGA-B4-5377	9	8	8	8
TCGA-BP-4992	9	8	9	9
TCGA-BP-4798	9	10	9	9
TCGA-CZ-5984	9	7	8	7
TCGA-DV-5574	9	9	9	8
TCGA-B0-4817	9	8	9	8
TCGA-BP-4804	9	9	9	9
TCGA-CJ-4894	9	9	9	9
TCGA-B0-4849	9	8	9	8
TCGA-CJ-4891	9	7	8	7
TCGA-BP-4961	9	7	8	7
TCGA-CJ-5677	9	7	8	6
TCGA-BP-4965	9	8	8	7
TCGA-BP-5199	9	9	9	9
TCGA-BP-5185	9	8	9	7
TCGA-BP-5195	9	8	8	7
TCGA-A3-3343	9	8	8	8
TCGA-BP-4335	9	9	9	8
TCGA-BP-5010	9	7	9	7
TCGA-A3-3370	9	9	9	9
TCGA-A3-3351	9	9	9	9
TCGA-CJ-5672	9	9	9	9
TCGA-B0-5710	9	8	8	7
TCGA-AS-3777	9	8	9	7
TCGA-BP-4987	9	8	8	7
TCGA-B0-4703	9	8	9	8
TCGA-B4-5834	9	8	8	7
TCGA-B0-5713	9	8	8	8
TCGA-B8-5162	9	9	8	9
TCGA-B0-4838	9	9	9	9
TCGA-CZ-5457	9	8	8	8
TCGA-CW-5590	9	8	8	7
TCGA-B0-4833	9	8	9	8
TCGA-B0-5709	9	9	8	8
TCGA-BP-4974	9	7	8	7
TCGA-BP-5001	9	8	9	7
TCGA-BP-5007	9	8	8	8
TCGA-CZ-4862	9	9	9	9
TCGA-MW-A4EC	9	8	9	8
TCGA-BP-4776	9	8	9	8
TCGA-AK-3447	9	8	9	8
TCGA-BP-4977	9	8	8	7
TCGA-B8-4153	9	8	8	7
TCGA-BP-4799	9	9	9	8
TCGA-AK-3436	9	7	8	7
TCGA-A3-A8CQ	9	7	8	7
TCGA-AK-3429	9	9	9	9
TCGA-BP-4962	9	8	8	8
TCGA-B8-4151	9	8	8	7
TCGA-BP-5008	9	8	8	8
TCGA-CJ-4641	9	9	9	9
TCGA-CJ-5675	9	10	9	9
TCGA-A3-A8OW	9	9	9	8
TCGA-BP-4774	9	8	8	7
TCGA-DV-A4VZ	9	7	8	7
TCGA-B0-4815	9	9	8	9
TCGA-B0-5098	10	8	9	7
TCGA-BP-4165	10	9	9	8
TCGA-G6-A5PC	10	9	9	8
TCGA-BP-4758	10	9	9	9
TCGA-DV-5566	10	8	9	8
TCGA-DV-A4W0	10	8	9	8
TCGA-BP-5175	10	8	9	8
TCGA-AK-3455	10	10	10	10
TCGA-B0-5077	10	8	9	8
TCGA-CJ-4638	10	8	10	8
TCGA-CJ-4869	10	10	10	10
TCGA-B0-4847	10	9	10	10
TCGA-B8-A54D	10	9	10	9
TCGA-AK-3434	10	9	10	9
TCGA-BP-5176	10	8	9	8
TCGA-B0-4691	10	9	9	8
TCGA-AK-3427	10	8	9	7
TCGA-DV-5573	10	10	10	10
TCGA-B0-5692	10	10	9	9
TCGA-AK-3445	10	9	9	8
TCGA-BP-5173	10	9	9	9
TCGA-CJ-4887	10	9	9	9
TCGA-B0-5399	10	8	9	8
TCGA-BP-4993	10	9	9	8
TCGA-CJ-4876	10	9	9	8
TCGA-AK-3451	10	9	9	8
TCGA-CZ-4856	10	9	10	9
TCGA-B0-5121	10	9	9	8
TCGA-A3-3357	10	9	9	9
TCGA-B0-5712	10	9	9	8
TCGA-B0-4713	10	9	10	8
TCGA-CJ-5678	10	9	10	9
TCGA-BP-5201	10	9	10	9
TCGA-CJ-4640	10	10	9	9
TCGA-B0-5705	10	9	9	9
TCGA-BP-5183	10	9	9	8
TCGA-CZ-5452	10	10	9	9
TCGA-B8-A54G	10	10	10	10
TCGA-BP-4325	10	10	9	9
TCGA-B0-5117	10	8	9	8
TCGA-BP-5191	10	9	10	9
TCGA-B0-5699	10	8	9	8
TCGA-CJ-5684	10	9	9	8
TCGA-B0-5092	10	10	10	10
TCGA-AK-3443	10	9	10	9
TCGA-AK-3458	10	9	10	8
TCGA-BP-4334	10	8	9	7
TCGA-BP-4981	10	9	9	8
TCGA-BP-5190	10	9	10	8
