# Supplementary material for: Clinical significance of nonerythrocytic spectrin Beta 1 (SPTBN1) in human kidney renal clear cell carcinoma and uveal melanoma: a study based on Pan-Cancer Analysis
Source: BMC Cancer. 2023 Apr 3;23:303. doi: 10.1186/s12885-023-10789-3 (PMC10071745; doi:10.1186/s12885-023-10789-3)
Supplement: Supplementary file 8 — Supplementary Material 8 [file 12885_2023_10789_MOESM8_ESM.xlsx]

## Sheet: Sheet1
revised_Suppmentary File 8 Detailed information about SPTBN1 expression of tumor samples from TCGA-KIRC patients.
barcode	SPTBN1	Type
TCGA-3Z-A93Z	5.28151	Tumor
TCGA-6D-AA2E	6.11499	Tumor
TCGA-A3-3306	4.47273	Tumor
TCGA-A3-3307	5.23356	Tumor
TCGA-A3-3308	5.2776	Tumor
TCGA-A3-3311	4.99011	Tumor
TCGA-A3-3313	6.2672	Tumor
TCGA-A3-3316	4.8717	Tumor
TCGA-A3-3317	5.42883	Tumor
TCGA-A3-3319	4.24877	Tumor
TCGA-A3-3320	5.87487	Tumor
TCGA-A3-3322	5.48134	Tumor
TCGA-A3-3323	5.36329	Tumor
TCGA-A3-3324	5.16327	Tumor
TCGA-A3-3325	5.06443	Tumor
TCGA-A3-3326	5.4105	Tumor
TCGA-A3-3328	3.98677	Tumor
TCGA-A3-3329	4.77948	Tumor
TCGA-A3-3331	5.58514	Tumor
TCGA-A3-3335	4.19983	Tumor
TCGA-A3-3343	5.11613	Tumor
TCGA-A3-3346	2.93982	Tumor
TCGA-A3-3347	4.80162	Tumor
TCGA-A3-3349	5.80271	Tumor
TCGA-A3-3351	5.47483	Tumor
TCGA-A3-3352	5.50819	Tumor
TCGA-A3-3357	4.77674	Tumor
TCGA-A3-3358	4.73391	Tumor
TCGA-A3-3359	5.25988	Tumor
TCGA-A3-3362	5.67748	Tumor
TCGA-A3-3363	3.70189	Tumor
TCGA-A3-3365	5.20972	Tumor
TCGA-A3-3367	5.77222	Tumor
TCGA-A3-3370	5.59427	Tumor
TCGA-A3-3372	5.75319	Tumor
TCGA-A3-3373	5.24212	Tumor
TCGA-A3-3374	4.47966	Tumor
TCGA-A3-3376	6.32744	Tumor
TCGA-A3-3378	4.57318	Tumor
TCGA-A3-3380	4.97496	Tumor
TCGA-A3-3382	4.71802	Tumor
TCGA-A3-3383	4.2416	Tumor
TCGA-A3-3385	4.54686	Tumor
TCGA-A3-3387	5.52039	Tumor
TCGA-A3-A6NI	5.1864	Tumor
TCGA-A3-A6NJ	5.65382	Tumor
TCGA-A3-A6NL	5.86805	Tumor
TCGA-A3-A6NN	5.85626	Tumor
TCGA-A3-A8CQ	6.29828	Tumor
TCGA-A3-A8OU	5.73084	Tumor
TCGA-A3-A8OV	4.69601	Tumor
TCGA-A3-A8OW	6.20089	Tumor
TCGA-A3-A8OX	5.28946	Tumor
TCGA-AK-3425	4.1928	Tumor
TCGA-AK-3426	3.64195	Tumor
TCGA-AK-3427	3.42489	Tumor
TCGA-AK-3428	5.53813	Tumor
TCGA-AK-3429	4.75365	Tumor
TCGA-AK-3431	5.35378	Tumor
TCGA-AK-3433	5.57829	Tumor
TCGA-AK-3434	5.33082	Tumor
TCGA-AK-3436	3.99103	Tumor
TCGA-AK-3440	5.3694	Tumor
TCGA-AK-3443	5.72477	Tumor
TCGA-AK-3445	4.47507	Tumor
TCGA-AK-3447	2.78644	Tumor
TCGA-AK-3450	5.17944	Tumor
TCGA-AK-3451	3.94262	Tumor
TCGA-AK-3453	3.78936	Tumor
TCGA-AK-3454	4.12848	Tumor
TCGA-AK-3455	4.39753	Tumor
TCGA-AK-3456	6.1832	Tumor
TCGA-AK-3458	3.67188	Tumor
TCGA-AK-3460	5.50083	Tumor
TCGA-AK-3461	5.59106	Tumor
TCGA-AK-3465	4.59916	Tumor
TCGA-AS-3777	4.30575	Tumor
TCGA-AS-3778	5.33831	Tumor
TCGA-B0-4688	3.97351	Tumor
TCGA-B0-4690	4.5768	Tumor
TCGA-B0-4691	3.72261	Tumor
TCGA-B0-4693	5.22622	Tumor
TCGA-B0-4694	4.20163	Tumor
TCGA-B0-4696	3.01193	Tumor
TCGA-B0-4697	4.13133	Tumor
TCGA-B0-4698	4.42837	Tumor
TCGA-B0-4699	4.66482	Tumor
TCGA-B0-4700	4.53687	Tumor
TCGA-B0-4701	4.90699	Tumor
TCGA-B0-4703	5.47218	Tumor
TCGA-B0-4706	4.52679	Tumor
TCGA-B0-4707	3.7713	Tumor
TCGA-B0-4710	5.27457	Tumor
TCGA-B0-4712	3.54063	Tumor
TCGA-B0-4713	3.25124	Tumor
TCGA-B0-4714	4.71112	Tumor
TCGA-B0-4718	4.51577	Tumor
TCGA-B0-4810	4.82952	Tumor
TCGA-B0-4811	3.87718	Tumor
TCGA-B0-4813	2.67401	Tumor
TCGA-B0-4814	5.6926	Tumor
TCGA-B0-4815	4.1567	Tumor
TCGA-B0-4816	4.90962	Tumor
TCGA-B0-4817	3.71095	Tumor
TCGA-B0-4818	5.30141	Tumor
TCGA-B0-4819	4.11969	Tumor
TCGA-B0-4821	3.68184	Tumor
TCGA-B0-4822	4.15312	Tumor
TCGA-B0-4823	5.31868	Tumor
TCGA-B0-4824	5.06851	Tumor
TCGA-B0-4827	5.18657	Tumor
TCGA-B0-4828	4.37508	Tumor
TCGA-B0-4833	4.63885	Tumor
TCGA-B0-4834	5.82555	Tumor
TCGA-B0-4836	4.54782	Tumor
TCGA-B0-4837	4.56712	Tumor
TCGA-B0-4838	5.26028	Tumor
TCGA-B0-4839	4.4004	Tumor
TCGA-B0-4841	4.15119	Tumor
TCGA-B0-4842	2.70342	Tumor
TCGA-B0-4843	4.68463	Tumor
TCGA-B0-4844	3.51114	Tumor
TCGA-B0-4845	5.20023	Tumor
TCGA-B0-4846	5.2163	Tumor
TCGA-B0-4847	3.69059	Tumor
TCGA-B0-4848	4.76541	Tumor
TCGA-B0-4849	4.92016	Tumor
TCGA-B0-4852	4.89403	Tumor
TCGA-B0-4945	5.66919	Tumor
TCGA-B0-5075	4.78852	Tumor
TCGA-B0-5077	5.08862	Tumor
TCGA-B0-5080	5.57153	Tumor
TCGA-B0-5081	4.47757	Tumor
TCGA-B0-5083	4.61316	Tumor
TCGA-B0-5084	4.95123	Tumor
TCGA-B0-5085	3.93015	Tumor
TCGA-B0-5088	4.84791	Tumor
TCGA-B0-5092	4.71037	Tumor
TCGA-B0-5094	4.08343	Tumor
TCGA-B0-5095	5.31626	Tumor
TCGA-B0-5096	5.11748	Tumor
TCGA-B0-5097	5.60263	Tumor
TCGA-B0-5098	4.36279	Tumor
TCGA-B0-5099	5.77425	Tumor
TCGA-B0-5100	4.16448	Tumor
TCGA-B0-5102	4.43409	Tumor
TCGA-B0-5104	5.43508	Tumor
TCGA-B0-5106	5.08321	Tumor
TCGA-B0-5107	3.6148	Tumor
TCGA-B0-5108	5.51041	Tumor
TCGA-B0-5109	5.31752	Tumor
TCGA-B0-5110	6.03991	Tumor
TCGA-B0-5113	5.46838	Tumor
TCGA-B0-5115	5.92239	Tumor
TCGA-B0-5116	4.96572	Tumor
TCGA-B0-5117	4.51667	Tumor
TCGA-B0-5119	6.11212	Tumor
TCGA-B0-5120	5.33928	Tumor
TCGA-B0-5121	5.31519	Tumor
TCGA-B0-5399	5.53008	Tumor
TCGA-B0-5400	3.47313	Tumor
TCGA-B0-5402	5.5588	Tumor
TCGA-B0-5690	6.39882	Tumor
TCGA-B0-5691	6.03123	Tumor
TCGA-B0-5692	4.71031	Tumor
TCGA-B0-5693	5.97136	Tumor
TCGA-B0-5694	5.15781	Tumor
TCGA-B0-5695	5.65564	Tumor
TCGA-B0-5696	4.85904	Tumor
TCGA-B0-5697	5.32285	Tumor
TCGA-B0-5698	5.48931	Tumor
TCGA-B0-5699	5.47645	Tumor
TCGA-B0-5700	5.111	Tumor
TCGA-B0-5701	5.31832	Tumor
TCGA-B0-5702	3.72932	Tumor
TCGA-B0-5703	4.8404	Tumor
TCGA-B0-5705	5.83759	Tumor
TCGA-B0-5706	4.6045	Tumor
TCGA-B0-5707	4.78396	Tumor
TCGA-B0-5709	6.15042	Tumor
TCGA-B0-5710	6.12225	Tumor
TCGA-B0-5711	5.91355	Tumor
TCGA-B0-5712	5.27888	Tumor
TCGA-B0-5713	5.84109	Tumor
TCGA-B0-5812	5.77576	Tumor
TCGA-B2-3923	5.92854	Tumor
TCGA-B2-3924	5.58642	Tumor
TCGA-B2-4098	3.05957	Tumor
TCGA-B2-4099	4.01878	Tumor
TCGA-B2-4101	5.78621	Tumor
TCGA-B2-4102	5.86988	Tumor
TCGA-B2-5633	5.79575	Tumor
TCGA-B2-5635	6.02532	Tumor
TCGA-B2-5636	6.32014	Tumor
TCGA-B2-5639	5.36356	Tumor
TCGA-B2-5641	5.56551	Tumor
TCGA-B2-A4SR	6.03947	Tumor
TCGA-B4-5377	5.33938	Tumor
TCGA-B4-5378	5.5833	Tumor
TCGA-B4-5832	4.12777	Tumor
TCGA-B4-5834	6.17186	Tumor
TCGA-B4-5835	3.97031	Tumor
TCGA-B4-5836	5.60726	Tumor
TCGA-B4-5838	5.54809	Tumor
TCGA-B4-5843	5.83713	Tumor
TCGA-B4-5844	6.18442	Tumor
TCGA-B8-4143	4.66396	Tumor
TCGA-B8-4148	5.64258	Tumor
TCGA-B8-4151	4.45416	Tumor
TCGA-B8-4154	4.23663	Tumor
TCGA-B8-4619	5.80602	Tumor
TCGA-B8-4620	4.47629	Tumor
TCGA-B8-4621	5.55625	Tumor
TCGA-B8-4622	4.89058	Tumor
TCGA-B8-5158	5.01552	Tumor
TCGA-B8-5159	6.50427	Tumor
TCGA-B8-5162	4.9635	Tumor
TCGA-B8-5163	5.71679	Tumor
TCGA-B8-5164	5.39805	Tumor
TCGA-B8-5165	6.02422	Tumor
TCGA-B8-5545	5.6848	Tumor
TCGA-B8-5546	5.7651	Tumor
TCGA-B8-5549	5.52213	Tumor
TCGA-B8-5550	6.23011	Tumor
TCGA-B8-5551	5.65424	Tumor
TCGA-B8-5553	6.12914	Tumor
TCGA-B8-A54D	4.66115	Tumor
TCGA-B8-A54E	4.10523	Tumor
TCGA-B8-A54F	4.88625	Tumor
TCGA-B8-A54G	4.74502	Tumor
TCGA-B8-A54H	5.66692	Tumor
TCGA-B8-A54I	4.34917	Tumor
TCGA-B8-A54J	5.85749	Tumor
TCGA-B8-A54K	5.26066	Tumor
TCGA-B8-A7U6	5.26064	Tumor
TCGA-B8-A8YJ	6.02804	Tumor
TCGA-BP-4158	4.92074	Tumor
TCGA-BP-4159	4.52764	Tumor
TCGA-BP-4160	4.64657	Tumor
TCGA-BP-4161	5.33185	Tumor
TCGA-BP-4162	5.9373	Tumor
TCGA-BP-4163	5.27556	Tumor
TCGA-BP-4164	4.60559	Tumor
TCGA-BP-4165	5.00597	Tumor
TCGA-BP-4166	5.0661	Tumor
TCGA-BP-4167	3.77017	Tumor
TCGA-BP-4169	5.40069	Tumor
TCGA-BP-4170	5.23271	Tumor
TCGA-BP-4173	4.8115	Tumor
TCGA-BP-4174	5.00533	Tumor
TCGA-BP-4176	3.98743	Tumor
TCGA-BP-4177	5.12525	Tumor
TCGA-BP-4325	4.70132	Tumor
TCGA-BP-4326	4.61139	Tumor
TCGA-BP-4327	4.94572	Tumor
TCGA-BP-4329	4.63212	Tumor
TCGA-BP-4330	5.49893	Tumor
TCGA-BP-4331	5.18576	Tumor
TCGA-BP-4332	5.23138	Tumor
TCGA-BP-4334	4.21278	Tumor
TCGA-BP-4335	4.92202	Tumor
TCGA-BP-4337	4.96857	Tumor
TCGA-BP-4338	4.67968	Tumor
TCGA-BP-4340	5.96789	Tumor
TCGA-BP-4341	5.13185	Tumor
TCGA-BP-4342	4.88943	Tumor
TCGA-BP-4343	3.54514	Tumor
TCGA-BP-4344	5.4573	Tumor
TCGA-BP-4345	5.13151	Tumor
TCGA-BP-4346	4.99625	Tumor
TCGA-BP-4347	5.79817	Tumor
TCGA-BP-4349	5.38312	Tumor
TCGA-BP-4351	5.08009	Tumor
TCGA-BP-4352	4.18485	Tumor
TCGA-BP-4353	5.29342	Tumor
TCGA-BP-4354	4.9336	Tumor
TCGA-BP-4355	5.66662	Tumor
TCGA-BP-4756	6.81831	Tumor
TCGA-BP-4758	4.86078	Tumor
TCGA-BP-4759	4.92623	Tumor
TCGA-BP-4760	5.63855	Tumor
TCGA-BP-4761	3.63658	Tumor
TCGA-BP-4762	5.0347	Tumor
TCGA-BP-4763	5.10544	Tumor
TCGA-BP-4765	5.54272	Tumor
TCGA-BP-4766	5.60541	Tumor
TCGA-BP-4768	5.09416	Tumor
TCGA-BP-4769	5.26851	Tumor
TCGA-BP-4770	3.99779	Tumor
TCGA-BP-4771	5.0456	Tumor
TCGA-BP-4774	5.46332	Tumor
TCGA-BP-4775	5.7997	Tumor
TCGA-BP-4776	4.79014	Tumor
TCGA-BP-4777	4.62869	Tumor
TCGA-BP-4781	4.9546	Tumor
TCGA-BP-4782	5.7493	Tumor
TCGA-BP-4784	4.97001	Tumor
TCGA-BP-4787	4.4048	Tumor
TCGA-BP-4789	6.0875	Tumor
TCGA-BP-4790	5.45907	Tumor
TCGA-BP-4795	6.07438	Tumor
TCGA-BP-4797	5.51475	Tumor
TCGA-BP-4798	4.56111	Tumor
TCGA-BP-4799	4.15449	Tumor
TCGA-BP-4801	6.02936	Tumor
TCGA-BP-4803	5.16513	Tumor
TCGA-BP-4804	4.74526	Tumor
TCGA-BP-4807	5.09973	Tumor
TCGA-BP-4959	5.04267	Tumor
TCGA-BP-4960	3.98151	Tumor
TCGA-BP-4961	6.23072	Tumor
TCGA-BP-4962	4.58329	Tumor
TCGA-BP-4963	5.2176	Tumor
TCGA-BP-4964	5.12712	Tumor
TCGA-BP-4965	5.91042	Tumor
TCGA-BP-4967	4.72402	Tumor
TCGA-BP-4968	4.5909	Tumor
TCGA-BP-4969	5.30672	Tumor
TCGA-BP-4970	5.93722	Tumor
TCGA-BP-4971	4.63366	Tumor
TCGA-BP-4972	5.72069	Tumor
TCGA-BP-4973	5.58591	Tumor
TCGA-BP-4974	6.03254	Tumor
TCGA-BP-4975	5.60298	Tumor
TCGA-BP-4976	5.68792	Tumor
TCGA-BP-4977	4.45305	Tumor
TCGA-BP-4981	4.09282	Tumor
TCGA-BP-4982	6.08247	Tumor
TCGA-BP-4983	5.91093	Tumor
TCGA-BP-4985	4.98247	Tumor
TCGA-BP-4986	5.25716	Tumor
TCGA-BP-4987	5.76976	Tumor
TCGA-BP-4989	4.62804	Tumor
TCGA-BP-4991	6.01292	Tumor
TCGA-BP-4992	3.24293	Tumor
TCGA-BP-4993	5.95333	Tumor
TCGA-BP-4994	5.49057	Tumor
TCGA-BP-4995	5.57928	Tumor
TCGA-BP-4998	5.31611	Tumor
TCGA-BP-4999	6.06454	Tumor
TCGA-BP-5000	4.45138	Tumor
TCGA-BP-5001	4.38998	Tumor
TCGA-BP-5004	5.51577	Tumor
TCGA-BP-5006	5.338	Tumor
TCGA-BP-5007	5.44825	Tumor
TCGA-BP-5008	5.55726	Tumor
TCGA-BP-5009	4.26349	Tumor
TCGA-BP-5010	4.31146	Tumor
TCGA-BP-5168	5.24216	Tumor
TCGA-BP-5169	3.67666	Tumor
TCGA-BP-5170	4.8403	Tumor
TCGA-BP-5173	5.32298	Tumor
TCGA-BP-5174	5.39612	Tumor
TCGA-BP-5175	3.18398	Tumor
TCGA-BP-5176	5.54196	Tumor
TCGA-BP-5177	5.62939	Tumor
TCGA-BP-5178	4.06838	Tumor
TCGA-BP-5180	4.46899	Tumor
TCGA-BP-5181	5.5635	Tumor
TCGA-BP-5182	5.24754	Tumor
TCGA-BP-5183	5.25124	Tumor
TCGA-BP-5184	5.8891	Tumor
TCGA-BP-5185	3.52415	Tumor
TCGA-BP-5186	6.03036	Tumor
TCGA-BP-5187	5.56671	Tumor
TCGA-BP-5189	5.64407	Tumor
TCGA-BP-5190	5.07551	Tumor
TCGA-BP-5191	3.70133	Tumor
TCGA-BP-5192	5.74676	Tumor
TCGA-BP-5194	5.89966	Tumor
TCGA-BP-5195	5.35746	Tumor
TCGA-BP-5196	4.77384	Tumor
TCGA-BP-5198	4.87933	Tumor
TCGA-BP-5199	5.12551	Tumor
TCGA-BP-5200	5.82879	Tumor
TCGA-BP-5201	4.94869	Tumor
TCGA-BP-5202	5.78153	Tumor
TCGA-CJ-4634	6.06677	Tumor
TCGA-CJ-4635	4.86695	Tumor
TCGA-CJ-4636	4.7354	Tumor
TCGA-CJ-4637	4.77753	Tumor
TCGA-CJ-4638	4.01907	Tumor
TCGA-CJ-4639	5.67578	Tumor
TCGA-CJ-4640	5.06615	Tumor
TCGA-CJ-4641	5.17423	Tumor
TCGA-CJ-4643	5.8459	Tumor
TCGA-CJ-4644	5.02154	Tumor
TCGA-CJ-4868	5.15346	Tumor
TCGA-CJ-4869	4.69303	Tumor
TCGA-CJ-4870	5.52609	Tumor
TCGA-CJ-4871	5.12284	Tumor
TCGA-CJ-4872	5.33802	Tumor
TCGA-CJ-4873	3.44785	Tumor
TCGA-CJ-4874	5.0871	Tumor
TCGA-CJ-4875	4.1665	Tumor
TCGA-CJ-4876	5.30196	Tumor
TCGA-CJ-4878	5.16611	Tumor
TCGA-CJ-4881	4.33286	Tumor
TCGA-CJ-4882	4.98729	Tumor
TCGA-CJ-4884	5.13051	Tumor
TCGA-CJ-4885	4.58522	Tumor
TCGA-CJ-4886	5.7051	Tumor
TCGA-CJ-4887	4.53485	Tumor
TCGA-CJ-4888	4.57046	Tumor
TCGA-CJ-4889	5.55427	Tumor
TCGA-CJ-4890	4.62224	Tumor
TCGA-CJ-4891	3.58497	Tumor
TCGA-CJ-4892	4.83444	Tumor
TCGA-CJ-4893	5.73447	Tumor
TCGA-CJ-4894	5.43991	Tumor
TCGA-CJ-4895	4.39829	Tumor
TCGA-CJ-4897	5.80438	Tumor
TCGA-CJ-4899	6.0697	Tumor
TCGA-CJ-4900	4.63931	Tumor
TCGA-CJ-4901	4.70072	Tumor
TCGA-CJ-4902	5.26311	Tumor
TCGA-CJ-4903	5.29771	Tumor
TCGA-CJ-4904	5.83514	Tumor
TCGA-CJ-4905	6.36649	Tumor
TCGA-CJ-4907	5.97976	Tumor
TCGA-CJ-4908	5.95266	Tumor
TCGA-CJ-4912	3.82923	Tumor
TCGA-CJ-4916	4.90589	Tumor
TCGA-CJ-4918	5.4127	Tumor
TCGA-CJ-4920	5.72096	Tumor
TCGA-CJ-5671	5.19713	Tumor
TCGA-CJ-5672	5.38117	Tumor
TCGA-CJ-5675	5.1596	Tumor
TCGA-CJ-5676	4.8442	Tumor
TCGA-CJ-5677	4.72001	Tumor
TCGA-CJ-5678	4.04562	Tumor
TCGA-CJ-5679	4.06148	Tumor
TCGA-CJ-5680	5.84637	Tumor
TCGA-CJ-5681	5.97433	Tumor
TCGA-CJ-5682	5.24087	Tumor
TCGA-CJ-5683	5.38459	Tumor
TCGA-CJ-5684	5.563	Tumor
TCGA-CJ-5686	5.41336	Tumor
TCGA-CJ-5689	5.05893	Tumor
TCGA-CJ-6027	4.03685	Tumor
TCGA-CJ-6028	4.87641	Tumor
TCGA-CJ-6030	4.94716	Tumor
TCGA-CJ-6031	4.76266	Tumor
TCGA-CJ-6032	6.15724	Tumor
TCGA-CJ-6033	4.49862	Tumor
TCGA-CW-5580	5.84094	Tumor
TCGA-CW-5581	6.02858	Tumor
TCGA-CW-5583	6.18315	Tumor
TCGA-CW-5584	5.96171	Tumor
TCGA-CW-5585	6.20677	Tumor
TCGA-CW-5587	6.17472	Tumor
TCGA-CW-5588	5.05656	Tumor
TCGA-CW-5589	5.99432	Tumor
TCGA-CW-5590	5.52848	Tumor
TCGA-CW-5591	6.24005	Tumor
TCGA-CW-6087	4.88829	Tumor
TCGA-CW-6088	6.72218	Tumor
TCGA-CW-6090	4.4923	Tumor
TCGA-CW-6093	6.10902	Tumor
TCGA-CW-6097	5.75218	Tumor
TCGA-CZ-4853	5.39611	Tumor
TCGA-CZ-4854	4.7033	Tumor
TCGA-CZ-4856	5.55556	Tumor
TCGA-CZ-4857	4.47709	Tumor
TCGA-CZ-4858	4.29471	Tumor
TCGA-CZ-4859	5.87619	Tumor
TCGA-CZ-4860	5.22276	Tumor
TCGA-CZ-4861	4.69751	Tumor
TCGA-CZ-4862	5.52962	Tumor
TCGA-CZ-4863	5.47581	Tumor
TCGA-CZ-4864	5.3645	Tumor
TCGA-CZ-4865	5.1595	Tumor
TCGA-CZ-4866	5.4315	Tumor
TCGA-CZ-5451	5.75195	Tumor
TCGA-CZ-5452	4.80234	Tumor
TCGA-CZ-5453	5.1283	Tumor
TCGA-CZ-5454	4.61045	Tumor
TCGA-CZ-5455	5.53972	Tumor
TCGA-CZ-5456	3.97554	Tumor
TCGA-CZ-5457	5.5401	Tumor
TCGA-CZ-5458	5.38412	Tumor
TCGA-CZ-5459	4.74838	Tumor
TCGA-CZ-5460	4.95832	Tumor
TCGA-CZ-5461	5.17209	Tumor
TCGA-CZ-5462	4.60248	Tumor
TCGA-CZ-5463	5.10761	Tumor
TCGA-CZ-5464	4.50542	Tumor
TCGA-CZ-5465	5.33662	Tumor
TCGA-CZ-5466	4.70342	Tumor
TCGA-CZ-5467	5.10012	Tumor
TCGA-CZ-5468	4.17076	Tumor
TCGA-CZ-5469	4.21975	Tumor
TCGA-CZ-5470	4.98406	Tumor
TCGA-CZ-5982	5.9213	Tumor
TCGA-CZ-5984	4.96385	Tumor
TCGA-CZ-5985	5.52498	Tumor
TCGA-CZ-5986	5.92425	Tumor
TCGA-CZ-5987	4.38178	Tumor
TCGA-CZ-5988	5.69748	Tumor
TCGA-CZ-5989	5.06675	Tumor
TCGA-DV-5565	5.51463	Tumor
TCGA-DV-5566	5.18936	Tumor
TCGA-DV-5567	5.74841	Tumor
TCGA-DV-5568	4.90629	Tumor
TCGA-DV-5569	5.55248	Tumor
TCGA-DV-5573	5.291	Tumor
TCGA-DV-5574	5.66738	Tumor
TCGA-DV-5575	5.83008	Tumor
TCGA-DV-5576	5.60939	Tumor
TCGA-DV-A4VX	3.81472	Tumor
TCGA-DV-A4VZ	3.61991	Tumor
TCGA-DV-A4W0	5.87265	Tumor
TCGA-EU-5904	6.13776	Tumor
TCGA-EU-5905	5.39847	Tumor
TCGA-EU-5906	6.04174	Tumor
TCGA-EU-5907	4.71297	Tumor
TCGA-G6-A5PC	3.89307	Tumor
TCGA-G6-A8L6	4.77734	Tumor
TCGA-G6-A8L7	2.30742	Tumor
TCGA-G6-A8L8	4.54686	Tumor
TCGA-GK-A6C7	5.90115	Tumor
TCGA-MM-A563	5.13726	Tumor
TCGA-MM-A564	4.45093	Tumor
TCGA-MM-A84U	4.93649	Tumor
TCGA-MW-A4EC	4.73608	Tumor
TCGA-T7-A92I	6.28813	Tumor
